# Supplementary material for: Antagonistic Interactions in Mitochondria ROS Signaling Responses to Manganese
Source: Antioxidants (Basel). 2023 Mar 25;12(4):804. doi: 10.3390/antiox12040804 (PMC10134992; doi:10.3390/antiox12040804)
Supplement: Supplementary file 1 [file antioxidants-12-00804-s001.zip]

Archive with 13 entries (13 files):
- Figure S1.pptx
- Figure S2.pptx
- Figure S3.pptx
- Table S1.xlsx
- Table S2.xlsx
- Table S3.xlsx
- Table S4.xlsx
- Table S5.xlsx
- Table S6.xlsx
- Table S7.xlsx
- Table S8.xlsx
- Table S9.xlsx
- Text S1.pdf
