# Supplementary material for: Antagonistic Interactions in Mitochondria ROS Signaling Responses to Manganese
Source: Antioxidants (Basel). 2023 Mar 25;12(4):804. doi: 10.3390/antiox12040804 (PMC10134992; doi:10.3390/antiox12040804)
Supplement: Supplementary file 1 [file antioxidants-12-00804-s001.zip › Table S1.xlsx]

## Sheet: Mn_Genes
Supplemental Table S1: Genes associated with Community 1 (intracellular Mn) at |r|>0.8 (P<0.05)
ID	|r|	RefSeq ID	KEGG ID	Gene name	Gene_description
Z307	0.9842	NM_001136495	uc009xfh.3	C1orf198	Homo sapiens chromosome 1 open reading frame 198 (C1orf198), transcript variant 3, mRNA. (from RefSeq NM_001136495)
Z344	0.984	NM_001935	uc002ubz.4	DPP4	Homo sapiens dipeptidyl-peptidase 4 (DPP4), mRNA. (from RefSeq NM_001935)
Z791	0.9826	NR_046839	uc031tzy.1	AGBL4-IT1	Homo sapiens AGBL4 intronic transcript 1 (AGBL4-IT1), long non-coding RNA. (from RefSeq NR_046839)
Z790	0.9826	NM_001164106	uc003bjl.4	MOV10L1	Homo sapiens Mov10 RISC complex RNA helicase like 1 (MOV10L1), transcript variant 4, mRNA. (from RefSeq NM_001164106)
Z895	0.9814	NM_001130099	uc010cdf.4	KIFC3	Homo sapiens kinesin family member C3 (KIFC3), transcript variant 3, mRNA. (from RefSeq NM_001130099)
Z4280	0.9791	NM_001945	uc003lfi.4	HBEGF	Homo sapiens heparin-binding EGF-like growth factor (HBEGF), mRNA. (from RefSeq NM_001945)
Z1751	0.9683	NM_005650	uc003bcj.3	TCF20	Homo sapiens transcription factor 20 (AR1) (TCF20), transcript variant 1, mRNA. (from RefSeq NM_005650)
Z1750	0.9683	NM_001184832	uc010bem.4	SLC12A1	Homo sapiens solute carrier family 12 (sodium/potassium/chloride transporter), member 1 (SLC12A1), transcript variant 2, mRNA. (from RefSeq NM_001184832)
Z1554	0.9629	NM_005330	uc001mal.2	HBE1	Homo sapiens hemoglobin, epsilon 1 (HBE1), mRNA. (from RefSeq NM_005330)
Z1553	0.9629	NR_033853	uc001nng.2	RP11-142C4.6	Homo sapiens uncharacterized LOC283194 (LOC283194), long non-coding RNA. (from RefSeq NR_033853)
Z2468	0.9496	NM_001927	uc002vll.3	DES	Homo sapiens desmin (DES), mRNA. (from RefSeq NM_001927)
Z2467	0.9496	NM_002514	uc003yoq.3	NOV	Homo sapiens nephroblastoma overexpressed (NOV), mRNA. (from RefSeq NM_002514)
Z2464	0.9496	NM_001024603	uc003vlj.2	RP5-907C10.4	Homo sapiens chromosome 7 open reading frame 77 (C7orf77), mRNA. (from RefSeq NM_001024603)
Z2470	0.9496	NM_139046	uc010qgk.4	MAPK8	Homo sapiens mitogen-activated protein kinase 8 (MAPK8), transcript variant JNK1-b1, mRNA. (from RefSeq NM_139046)
Z2469	0.9496	NM_199482	uc002uum.4	MOB4	Homo sapiens MOB family member 4, phocein (MOB4), transcript variant 2, mRNA. (from RefSeq NM_199482)
Z2466	0.9496	NR_108027	uc032vtt.2	LINC01484	Homo sapiens long intergenic non-protein coding RNA 1484 (LINC01484), long non-coding RNA. (from RefSeq NR_108027)
Z2465	0.9496	NM_001130845	uc003frp.4	BCL6	Homo sapiens B-cell CLL/lymphoma 6 (BCL6), transcript variant 2, mRNA. (from RefSeq NM_001130845)
Z42	0.9447	NM_001554	uc001dle.4	CYR61	Homo sapiens cysteine-rich, angiogenic inducer, 61 (CYR61), mRNA. (from RefSeq NM_001554)
Z2611	0.9446	NM_013308	uc003eyq.5	GPR171	Homo sapiens G protein-coupled receptor 171 (GPR171), mRNA. (from RefSeq NM_013308)
Z2612	0.9446	NM_178034	uc001zox.3	PLA2G4D	Homo sapiens phospholipase A2, group IVD (cytosolic) (PLA2G4D), mRNA. (from RefSeq NM_178034)
Z2610	0.9446	NM_178276	uc003kgk.4	SERINC5	Homo sapiens serine incorporator 5 (SERINC5), transcript variant 2, mRNA. (from RefSeq NM_178276)
Z2613	0.9446	NR_110877	uc060jjh.1	SOX9-AS1	Homo sapiens uncharacterized LOC102723517 (LOC102723517), long non-coding RNA. (from RefSeq NR_110877)
Z3025	0.9438	NM_002052	uc003wuc.3	GATA4	Homo sapiens GATA binding protein 4 (GATA4), transcript variant 2, mRNA. (from RefSeq NM_002052)
Z2216	0.9419	NM_001012970	uc001iah.5	C1orf100	Homo sapiens chromosome 1 open reading frame 100 (C1orf100), transcript variant 1, mRNA. (from RefSeq NM_001012970)
Z2218	0.9419	NR_037496	uc021wny.1	MIR3928	Homo sapiens microRNA 3928 (MIR3928), microRNA. (from RefSeq NR_037496)
Z2217	0.9419	NR_039967	uc021yak.1	MIR4803	Homo sapiens microRNA 4803 (MIR4803), microRNA. (from RefSeq NR_039967)
Z2215	0.9419	NM_001130677	uc010wdq.3	C17orf96	Homo sapiens chromosome 17 open reading frame 96 (C17orf96), mRNA. (from RefSeq NM_001130677)
Z2338	0.9364	NM_001270453	uc010vlm.2	WWP2	Homo sapiens WW domain containing E3 ubiquitin protein ligase 2 (WWP2), transcript variant 4, mRNA. (from RefSeq NM_001270453)
Z2334	0.9364	NM_004931	uc002srz.4	CD8B	Homo sapiens CD8b molecule (CD8B), transcript variant 5, mRNA. (from RefSeq NM_004931)
Z2336	0.9364	NM_006167	uc011kzx.3	NKX3-1	Homo sapiens NK3 homeobox 1 (NKX3-1), transcript variant 1, mRNA. (from RefSeq NM_006167)
Z2337	0.9364	NM_032160	uc002lke.2	DSEL	Homo sapiens dermatan sulfate epimerase-like (DSEL), mRNA. (from RefSeq NM_032160)
Z2335	0.9364	NM_144670	uc001quz.6	A2ML1	Homo sapiens alpha-2-macroglobulin-like 1 (A2ML1), transcript variant 1, mRNA. (from RefSeq NM_144670)
Z2340	0.9364	NR_030328	uc022arw.2	MIR598	Homo sapiens microRNA 598 (MIR598), microRNA. (from RefSeq NR_030328)
Z2339	0.9364	NM_001197296	uc004asf.5	ECM2	Homo sapiens extracellular matrix protein 2, female organ and adipocyte specific (ECM2), transcript variant 3, mRNA. (from RefSeq NM_001197296)
Z1384	0.9345	NM_032536	uc004cbh.3	NTNG2	Homo sapiens netrin G2 (NTNG2), mRNA. (from RefSeq NM_032536)
Z4406	0.9343	NM_207398	uc001dna.2	GBP7	Homo sapiens guanylate binding protein 7 (GBP7), mRNA. (from RefSeq NM_207398)
Z3300	0.9328	NM_001146055	uc003hsr.4	SNCA	Homo sapiens synuclein, alpha (non A4 component of amyloid precursor) (SNCA), transcript variant 3, mRNA. (from RefSeq NM_001146055)
Z2707	0.9278	NM_133484	uc061oyf.1	TANK	Homo sapiens TRAF family member-associated NFKB activator (TANK), transcript variant 2, mRNA. (from RefSeq NM_133484)
Z1670	0.9238	NR_106819	uc031znl.1	MIR6761	Homo sapiens microRNA 6761 (MIR6761), microRNA. (from RefSeq NR_106819)
Z4477	0.9204	NM_030926	uc002vqz.5	ITM2C	Homo sapiens integral membrane protein 2C (ITM2C), transcript variant 1, mRNA. (from RefSeq NM_030926)
Z1782	0.9175	NM_001272034	uc010xjr.4	STXBP2	Homo sapiens syntaxin binding protein 2 (STXBP2), transcript variant 3, mRNA. (from RefSeq NM_001272034)
Z1781	0.9175	NR_047036	uc031qld.3	LINC00457	Homo sapiens long intergenic non-protein coding RNA 457 (LINC00457), long non-coding RNA. (from RefSeq NR_047036)
Z2021	0.9036	NM_001256574	uc031skd.1	ENC1	Homo sapiens ectodermal-neural cortex 1 (with BTB domain) (ENC1), transcript variant 2, mRNA. (from RefSeq NM_001256574)
Z897	0.893	NR_110596	uc001swn.3	LGR5	Homo sapiens leucine-rich repeat containing G protein-coupled receptor 5 (LGR5), transcript variant 4, non-coding RNA. (from RefSeq NR_110596)
Z418	0.8926	NM_001448	uc004exc.2	GPC4	Homo sapiens glypican 4 (GPC4), mRNA. (from RefSeq NM_001448)
Z3528	0.8906	NM_198540	uc002oqs.3	B3GNT8	Homo sapiens UDP-GlcNAc:betaGal beta-1,3-N-acetylglucosaminyltransferase 8 (B3GNT8), mRNA. (from RefSeq NM_198540)
Z2981	0.889	NM_024863	uc004ekl.4	TCEAL4	Homo sapiens transcription elongation factor A (SII)-like 4 (TCEAL4), transcript variant 1, mRNA. (from RefSeq NM_024863)
Z4631	0.8869	NM_144645	uc003hqe.5	C4orf36	Homo sapiens chromosome 4 open reading frame 36 (C4orf36), mRNA. (from RefSeq NM_144645)
Z453	0.8866	NM_022073	uc001wsa.5	EGLN3	Homo sapiens egl-9 family hypoxia-inducible factor 3 (EGLN3), transcript variant 1, mRNA. (from RefSeq NM_022073)
Z3900	0.8775	NM_152850	uc003zwf.4	PIGO	Homo sapiens phosphatidylinositol glycan anchor biosynthesis, class O (PIGO), transcript variant 2, mRNA. (from RefSeq NM_152850)
Z2968	0.8739	NM_014495	uc001das.3	ANGPTL3	Homo sapiens angiopoietin-like 3 (ANGPTL3), mRNA. (from RefSeq NM_014495)
Z122	0.864	NM_001190738	uc022bdp.1	NFIB	Homo sapiens nuclear factor I/B (NFIB), transcript variant 2, mRNA. (from RefSeq NM_001190738)
Z2020	0.8625	NM_003712	uc002loi.5	PPAP2C	Homo sapiens phosphatidic acid phosphatase type 2C (PPAP2C), transcript variant 1, mRNA. (from RefSeq NM_003712)
Z4867	0.8599	NM_001128224	uc010htg.4	TMCC1	Homo sapiens transmembrane and coiled-coil domain family 1 (TMCC1), transcript variant 3, mRNA. (from RefSeq NM_001128224)
Z4068	0.8587	NM_001170704	uc004eww.4	MBNL3	Homo sapiens muscleblind-like splicing regulator 3 (MBNL3), transcript variant 6, mRNA. (from RefSeq NM_001170704)
Z3390	0.8579	NM_001008539	uc064kns.1	SLC7A2	Homo sapiens solute carrier family 7 (cationic amino acid transporter, y+ system), member 2 (SLC7A2), transcript variant 2, mRNA. (from RefSeq NM_001008539)
Z556	0.8577	NM_020469	uc033djz.1	ABO	Homo sapiens ABO blood group (transferase A, alpha 1-3-N-acetylgalactosaminyltransferase; transferase B, alpha 1-3-galactosyltransferase) (ABO), mRNA. (from RefSeq NM_020469)
Z1972	0.8546	NM_052839	uc003bjn.5	PANX2	Homo sapiens pannexin 2 (PANX2), transcript variant 1, mRNA. (from RefSeq NM_052839)
Z2939	0.8536	NM_005627	uc003qen.5	SGK1	Homo sapiens serum/glucocorticoid regulated kinase 1 (SGK1), transcript variant 1, mRNA. (from RefSeq NM_005627)
Z459	0.8536	NM_181726	uc003ixm.4	ANKRD37	Homo sapiens ankyrin repeat domain 37 (ANKRD37), mRNA. (from RefSeq NM_181726)
Z3513	0.8521	NM_001136557	uc004bze.3	GPR107	Homo sapiens G protein-coupled receptor 107 (GPR107), transcript variant 1, mRNA. (from RefSeq NM_001136557)
Z2584	0.8507	NM_001300961	uc063hjf.1	BRD8	Homo sapiens bromodomain containing 8 (BRD8), transcript variant 5, mRNA. (from RefSeq NM_001300961)
Z2452	0.8466	NM_001287061	uc011kee.4	RABGEF1	Homo sapiens RAB guanine nucleotide exchange factor (GEF) 1 (RABGEF1), transcript variant 2, mRNA. (from RefSeq NM_001287061)
Z856	0.8462	NR_119375	uc001diz.6	RP11-475O6.1	Homo sapiens uncharacterized LOC101927587 (LOC101927587), long non-coding RNA. (from RefSeq NR_119375)
Z288	0.8433	NM_001199671	uc003vnr.4	CALU	Homo sapiens calumenin (CALU), transcript variant 3, mRNA. (from RefSeq NM_001199671)
Z1961	0.8428	NM_006688	uc002ihv.4	C1QL1	Homo sapiens complement component 1, q subcomponent-like 1 (C1QL1), mRNA. (from RefSeq NM_006688)
Z792	0.8428	NR_029501	uc060ujw.1	MIR27A	Homo sapiens microRNA 27a (MIR27A), microRNA. (from RefSeq NR_029501)
Z4252	0.8398	NM_032854	uc002hel.2	CORO6	Homo sapiens coronin 6 (CORO6), mRNA. (from RefSeq NM_032854)
Z1973	0.8389	NM_012208	uc003lgx.5	HARS2	Homo sapiens histidyl-tRNA synthetase 2, mitochondrial (HARS2), transcript variant 1, mRNA. (from RefSeq NM_012208)
Z808	0.8365	NM_001142275	uc001yve.4	NIPA1	Homo sapiens non imprinted in Prader-Willi/Angelman syndrome 1 (NIPA1), transcript variant 2, mRNA. (from RefSeq NM_001142275)
Z2265	0.834	NM_144575	uc061hvv.1	CAPN13	Homo sapiens calpain 13 (CAPN13), mRNA. (from RefSeq NM_144575)
Z2024	0.8327	NM_001001715	uc001vni.5	FARP1	Homo sapiens FERM, RhoGEF (ARHGEF) and pleckstrin domain protein 1 (chondrocyte-derived) (FARP1), transcript variant 2, mRNA. (from RefSeq NM_001001715)
Z725	0.8297	NM_138367	uc003zdv.5	ZNF251	Homo sapiens zinc finger protein 251 (ZNF251), mRNA. (from RefSeq NM_138367)
Z2894	0.8291	NM_020931	uc003pdj.5	KIAA1586	Homo sapiens KIAA1586 (KIAA1586), transcript variant 1, mRNA. (from RefSeq NM_020931)
Z4413	0.829	NM_001130849	uc010fxq.4	CAB39	Homo sapiens calcium binding protein 39 (CAB39), transcript variant 2, mRNA. (from RefSeq NM_001130849)
Z4708	0.826	NR_106774	uc032aso.1	MIR6717	Homo sapiens microRNA 6717 (MIR6717), microRNA. (from RefSeq NR_106774)
Z2823	0.8258	NM_032918	uc001rct.4	RERG	Homo sapiens RAS-like, estrogen-regulated, growth inhibitor (RERG), transcript variant 1, mRNA. (from RefSeq NM_032918)
Z417	0.8238	NM_052863	uc003mly.4	SCGB3A1	Homo sapiens secretoglobin, family 3A, member 1 (SCGB3A1), mRNA. (from RefSeq NM_052863)
Z1933	0.8236	NR_037424	uc010mqv.4	MIR3651	Homo sapiens microRNA 3651 (MIR3651), microRNA. (from RefSeq NR_037424)
Z863	-0.8218	NM_182847	uc002vma.4	ASIC4	Homo sapiens acid sensing (proton gated) ion channel family member 4 (ASIC4), mRNA. (from RefSeq NM_182847)
Z2780	-0.8223	NM_001142300	uc002vci.4	CCNYL1	Homo sapiens cyclin Y-like 1 (CCNYL1), transcript variant 1, mRNA. (from RefSeq NM_001142300)
Z3079	-0.8242	NM_001271959	uc031pph.1	SLC39A1	Homo sapiens solute carrier family 39 (zinc transporter), member 1 (SLC39A1), transcript variant 4, mRNA. (from RefSeq NM_001271959)
Z3616	-0.8243	NM_001286522	uc001qmm.4	PARP11	Homo sapiens poly (ADP-ribose) polymerase family, member 11 (PARP11), transcript variant 3, mRNA. (from RefSeq NM_001286522)
Z3593	-0.8245	NM_001288725	uc010rdz.4	ELP4	Homo sapiens elongator acetyltransferase complex subunit 4 (ELP4), transcript variant 2, mRNA. (from RefSeq NM_001288725)
Z3076	-0.8269	NM_001286440	uc032dni.2	NME4	Homo sapiens NME/NM23 nucleoside diphosphate kinase 4 (NME4), transcript variant 7, mRNA. (from RefSeq NM_001286440)
Z1618	-0.8274	NM_183378	uc001rix.2	OVCH1	Homo sapiens ovochymase 1 (OVCH1), mRNA. (from RefSeq NM_183378)
Z4687	-0.8287	NR_103746	uc001ecw.3	LINC01356	Homo sapiens long intergenic non-protein coding RNA 1356 (LINC01356), long non-coding RNA. (from RefSeq NR_103746)
Z3847	-0.8299	NM_002031	uc003pwi.2	FRK	Homo sapiens fyn-related Src family tyrosine kinase (FRK), mRNA. (from RefSeq NM_002031)
Z2908	-0.8317	NM_001282756	uc002rsp.2	MTA3	Homo sapiens metastasis associated 1 family, member 3 (MTA3), transcript variant 2, mRNA. (from RefSeq NM_001282756)
Z347	-0.8318	NR_110224	uc002sdf.3	AC007880.1	Homo sapiens uncharacterized LOC101927438 (LOC101927438), long non-coding RNA. (from RefSeq NR_110224)
Z4083	-0.8322	NM_015497	uc059icp.1	TMEM87A	Homo sapiens transmembrane protein 87A (TMEM87A), transcript variant 1, mRNA. (from RefSeq NM_015497)
Z4665	-0.8351	NM_015490	uc001krc.2	SEC31B	Homo sapiens SEC31 homolog B (S. cerevisiae) (SEC31B), mRNA. (from RefSeq NM_015490)
Z4853	-0.8356	NM_025244	uc002szi.5	TSGA10	Homo sapiens testis specific, 10 (TSGA10), transcript variant 1, mRNA. (from RefSeq NM_025244)
Z2317	-0.8364	NM_003512	uc003ngm.4	HIST1H2AC	Homo sapiens histone cluster 1, H2ac (HIST1H2AC), mRNA. (from RefSeq NM_003512)
Z3912	-0.8401	NM_001136205	uc002kvw.6	KCTD1	Homo sapiens potassium channel tetramerization domain containing 1 (KCTD1), transcript variant 1, mRNA. (from RefSeq NM_001136205)
Z2346	-0.8412	NM_024933	uc002shk.5	ANKRD53	Homo sapiens ankyrin repeat domain 53 (ANKRD53), transcript variant 2, mRNA. (from RefSeq NM_024933)
Z3002	-0.8417	NR_108104	uc003tvu.5	LINC01372	Homo sapiens long intergenic non-protein coding RNA 1372 (LINC01372), long non-coding RNA. (from RefSeq NR_108104)
Z2900	-0.8427	NM_001042495	uc001zid.4	SLC12A6	Homo sapiens solute carrier family 12 (potassium/chloride transporter), member 6 (SLC12A6), transcript variant 4, mRNA. (from RefSeq NM_001042495)
Z1980	-0.843	NM_016381	uc062jhx.1	TREX1	Homo sapiens three prime repair exonuclease 1 (TREX1), transcript variant 1, mRNA. (from RefSeq NM_016381)
Z4195	-0.843	NM_022359	uc001emh.4	PDE4DIP	Homo sapiens phosphodiesterase 4D interacting protein (PDE4DIP), transcript variant 3, mRNA. (from RefSeq NM_022359)
Z3396	-0.843	NR_125430	uc064kql.1	CTD-2547L16.1	Homo sapiens uncharacterized LOC101929066 (LOC101929066), transcript variant 2, long non-coding RNA. (from RefSeq NR_125430)
Z1711	-0.8446	NM_016944	uc003vwq.2	TAS2R4	Homo sapiens taste receptor, type 2, member 4 (TAS2R4), mRNA. (from RefSeq NM_016944)
Z3166	-0.8447	NM_133497	uc003zho.3	KCNV2	Homo sapiens potassium channel, voltage gated modifier subfamily V, member 2 (KCNV2), mRNA. (from RefSeq NM_133497)
Z1407	-0.8452	NM_198537	uc002nmt.3	YJEFN3	Homo sapiens YjeF N-terminal domain containing 3 (YJEFN3), transcript variant 1, mRNA. (from RefSeq NM_198537)
Z4416	-0.8453	NR_052004	uc031rwa.1	COL18A1-AS2	Homo sapiens COL18A1 antisense RNA 2 (COL18A1-AS2), long non-coding RNA. (from RefSeq NR_052004)
Z3409	-0.8453	NM_001141917	uc011lor.3	FAM205A	Homo sapiens family with sequence similarity 205, member A (FAM205A), mRNA. (from RefSeq NM_001141917)
Z3622	-0.8486	NM_001171948	uc021uqq.1	KXD1	Homo sapiens KxDL motif containing 1 (KXD1), transcript variant 1, mRNA. (from RefSeq NM_001171948)
Z3798	-0.8487	NM_001264573	uc031rbb.2	KIF18B	Homo sapiens kinesin family member 18B (KIF18B), transcript variant 2, mRNA. (from RefSeq NM_001264573)
Z1145	-0.8489	NM_001135218	uc001bqx.5	TAF12	Homo sapiens TAF12 RNA polymerase II, TATA box binding protein (TBP)-associated factor, 20kDa (TAF12), transcript variant 1, mRNA. (from RefSeq NM_001135218)
Z2421	-0.8493	NR_036540	uc021osv.2	LINC00622	Homo sapiens long intergenic non-protein coding RNA 622 (LINC00622), long non-coding RNA. (from RefSeq NR_036540)
Z1061	-0.8508	NM_174963	uc001ckb.4	ST3GAL3	Homo sapiens ST3 beta-galactoside alpha-2,3-sialyltransferase 3 (ST3GAL3), transcript variant 1, mRNA. (from RefSeq NM_174963)
Z3790	-0.8538	NM_017594	uc004aqx.2	DIRAS2	Homo sapiens DIRAS family, GTP-binding RAS-like 2 (DIRAS2), mRNA. (from RefSeq NM_017594)
Z179	-0.8553	NM_182791	uc031qss.3	CCDC33	Homo sapiens coiled-coil domain containing 33 (CCDC33), transcript variant 2, mRNA. (from RefSeq NM_182791)
Z3954	-0.8558	NM_016564	uc001lrh.2	CEND1	Homo sapiens cell cycle exit and neuronal differentiation 1 (CEND1), mRNA. (from RefSeq NM_016564)
Z4312	-0.8563	NM_030621	uc059ett.1	DICER1	Homo sapiens dicer 1, ribonuclease type III (DICER1), transcript variant 2, mRNA. (from RefSeq NM_030621)
Z3442	-0.8568	NM_001145118	uc011jwx.3	GRID2IP	Homo sapiens glutamate receptor, ionotropic, delta 2 (Grid2) interacting protein (GRID2IP), mRNA. (from RefSeq NM_001145118)
Z1467	-0.8574	NM_001282687	uc061fxi.1	SH3YL1	Homo sapiens SH3 and SYLF domain containing 1 (SH3YL1), transcript variant 4, mRNA. (from RefSeq NM_001282687)
Z785	-0.8577	NM_019885	uc002sih.3	CYP26B1	Homo sapiens cytochrome P450, family 26, subfamily B, polypeptide 1 (CYP26B1), transcript variant 1, mRNA. (from RefSeq NM_019885)
Z1257	-0.8586	NM_001297422	uc010sdu.2	RAD52	Homo sapiens RAD52 homolog (S. cerevisiae) (RAD52), transcript variant 5, mRNA. (from RefSeq NM_001297422)
Z2656	-0.8597	NM_001281300	uc003wje.3	AGAP3	Homo sapiens ArfGAP with GTPase domain, ankyrin repeat and PH domain 3 (AGAP3), transcript variant 3, mRNA. (from RefSeq NM_001281300)
Z2577	-0.8599	NM_173552	uc003evo.4	C3orf58	Homo sapiens chromosome 3 open reading frame 58 (C3orf58), transcript variant 1, mRNA. (from RefSeq NM_173552)
Z1395	-0.8612	NM_001143677	uc011ecw.3	SGK1	Homo sapiens serum/glucocorticoid regulated kinase 1 (SGK1), transcript variant 3, mRNA. (from RefSeq NM_001143677)
Z3188	-0.8614	NM_005608	uc001oli.2	PTPRCAP	Homo sapiens protein tyrosine phosphatase, receptor type, C-associated protein (PTPRCAP), mRNA. (from RefSeq NM_005608)
Z318	-0.8617	NR_033957	uc031wez.1	ANXA8L1	Homo sapiens long intergenic non-protein coding RNA 842 (LINC00842), long non-coding RNA. (from RefSeq NR_033957)
Z1968	-0.8634	NM_001102610	uc001yuq.3	TUBGCP5	Homo sapiens tubulin, gamma complex associated protein 5 (TUBGCP5), transcript variant 2, mRNA. (from RefSeq NM_001102610)
Z8	-0.8648	NM_005454	uc003zlj.4	CER1	Homo sapiens cerberus 1, DAN family BMP antagonist (CER1), mRNA. (from RefSeq NM_005454)
Z1391	-0.8649	NM_004179	uc001mnp.3	TPH1	Homo sapiens tryptophan hydroxylase 1 (TPH1), mRNA. (from RefSeq NM_004179)
Z1303	-0.8655	NR_046205	uc003xia.3	RBPMS-AS1	Homo sapiens RBPMS antisense RNA 1 (RBPMS-AS1), long non-coding RNA. (from RefSeq NR_046205)
Z4212	-0.8659	NM_021248	uc010ghk.3	CDH22	Homo sapiens cadherin 22, type 2 (CDH22), mRNA. (from RefSeq NM_021248)
Z2932	-0.866	NM_001171941	uc001bwg.5	FNDC5	Homo sapiens fibronectin type III domain containing 5 (FNDC5), transcript variant 1, mRNA. (from RefSeq NM_001171941)
Z957	-0.8667	NM_018926	uc003lkj.3	PCDHGB6	Homo sapiens protocadherin gamma subfamily B, 6 (PCDHGB6), transcript variant 1, mRNA. (from RefSeq NM_018926)
Z2941	-0.8669	NM_001005366	uc058uhm.1	KDM2B	Homo sapiens lysine (K)-specific demethylase 2B (KDM2B), transcript variant 2, mRNA. (from RefSeq NM_001005366)
Z3897	-0.8681	NM_002228	uc001cze.4	JUN	Homo sapiens jun proto-oncogene (JUN), mRNA. (from RefSeq NM_002228)
Z331	-0.8685	NR_004393	uc033aoy.1	RNY4	Homo sapiens RNA, Ro-associated Y4 (RNY4), Y RNA. (from RefSeq NR_004393)
Z2503	-0.8698	NM_015692	uc002nfb.4	CPAMD8	Homo sapiens C3 and PZP-like, alpha-2-macroglobulin domain containing 8 (CPAMD8), mRNA. (from RefSeq NM_015692)
Z4193	-0.8706	NM_015163	uc001wyx.5	TRIM9	Homo sapiens tripartite motif containing 9 (TRIM9), transcript variant 1, mRNA. (from RefSeq NM_015163)
Z4943	-0.8707	NM_000660	uc002oqh.4	TGFB1	Homo sapiens transforming growth factor, beta 1 (TGFB1), mRNA. (from RefSeq NM_000660)
Z988	-0.8715	NM_001130055	uc011lkk.2	EEF1D	Homo sapiens eukaryotic translation elongation factor 1 delta (guanine nucleotide exchange protein) (EEF1D), transcript variant 5, mRNA. (from RefSeq NM_001130055)
Z4376	-0.872	NM_006452	uc003hbs.1	PAICS	Homo sapiens phosphoribosylaminoimidazole carboxylase, phosphoribosylaminoimidazole succinocarboxamide synthetase (PAICS), transcript variant 2, mRNA. (from RefSeq NM_006452)
Z3752	-0.872	NM_001029955	uc003gwk.2	DCAF4L1	Homo sapiens DDB1 and CUL4 associated factor 4-like 1 (DCAF4L1), mRNA. (from RefSeq NM_001029955)
Z72	-0.8722	NM_004473	uc004axu.4	FOXE1	Homo sapiens forkhead box E1 (FOXE1), mRNA. (from RefSeq NM_004473)
Z251	-0.8732	NR_106808	uc031xro.1	MIR6750	Homo sapiens microRNA 6750 (MIR6750), microRNA. (from RefSeq NR_106808)
Z1280	-0.8757	NM_021978	uc001qfw.4	ST14	Homo sapiens suppression of tumorigenicity 14 (colon carcinoma) (ST14), mRNA. (from RefSeq NM_021978)
Z1902	-0.8759	NM_001252127	uc021skz.2	AP4E1	Homo sapiens adaptor-related protein complex 4, epsilon 1 subunit (AP4E1), transcript variant 2, mRNA. (from RefSeq NM_001252127)
Z3299	-0.8766	NR_026974	uc003zfb.5	ZNF252P-AS1	Homo sapiens ZNF252P antisense RNA 1 (ZNF252P-AS1), long non-coding RNA. (from RefSeq NR_026974)
Z811	-0.8776	NR_110542	uc062diq.1	PIK3IP1-AS1	Homo sapiens PIK3IP1 antisense RNA 1 (head to head) (PIK3IP1-AS1), long non-coding RNA. (from RefSeq NR_110542)
Z1425	-0.8785	NM_001165958	uc010cwj.4	GSDMB	Homo sapiens gasdermin B (GSDMB), transcript variant 3, mRNA. (from RefSeq NM_001165958)
Z4870	-0.8791	NM_153047	uc003pvh.3	FYN	Homo sapiens FYN proto-oncogene, Src family tyrosine kinase (FYN), transcript variant 2, mRNA. (from RefSeq NM_153047)
Z345	-0.8797	NR_026995	uc002uht.4	RAPGEF4-AS1	Homo sapiens RAPGEF4 antisense RNA 1 (RAPGEF4-AS1), long non-coding RNA. (from RefSeq NR_026995)
Z580	-0.8825	NM_014873	uc001hiv.3	LPGAT1	Homo sapiens lysophosphatidylglycerol acyltransferase 1 (LPGAT1), mRNA. (from RefSeq NM_014873)
Z3333	-0.8875	NM_001270614	uc031rkz.2	DEDD2	Homo sapiens death effector domain containing 2 (DEDD2), transcript variant 2, mRNA. (from RefSeq NM_001270614)
Z4346	-0.8886	NM_205853	uc003dga.5	MUSTN1	Homo sapiens musculoskeletal, embryonic nuclear protein 1 (MUSTN1), mRNA. (from RefSeq NM_205853)
Z2145	-0.8887	NM_144651	uc003xqu.5	PXDNL	Homo sapiens peroxidasin-like (PXDNL), mRNA. (from RefSeq NM_144651)
Z732	-0.8901	NM_181788	uc001rrm.3	H1FNT	Homo sapiens H1 histone family, member N, testis-specific (H1FNT), mRNA. (from RefSeq NM_181788)
Z1072	-0.8939	NM_001255976	uc061xzd.1	PMEPA1	Homo sapiens prostate transmembrane protein, androgen induced 1 (PMEPA1), transcript variant 5, mRNA. (from RefSeq NM_001255976)
Z649	-0.8941	NR_028328	uc001pjo.2	ELMOD1	Homo sapiens uncharacterized LOC643923 (LOC643923), long non-coding RNA. (from RefSeq NR_028328)
Z536	-0.8942	NR_031697	uc021xap.1	MIR1284	Homo sapiens microRNA 1284 (MIR1284), microRNA. (from RefSeq NR_031697)
Z2321	-0.8977	NM_173479	uc002nui.4	WDR88	Homo sapiens WD repeat domain 88 (WDR88), mRNA. (from RefSeq NM_173479)
Z2048	-0.9	NR_106862	uc032ifs.1	MIR6804	Homo sapiens microRNA 6804 (MIR6804), microRNA. (from RefSeq NR_106862)
Z2488	-0.9006	NR_110997	uc032vkw.2	AC034220.3	Homo sapiens uncharacterized LOC553103 (LOC553103), long non-coding RNA. (from RefSeq NR_110997)
Z2679	-0.902	NM_001288767	uc010vfn.3	ARMC5	Homo sapiens armadillo repeat containing 5 (ARMC5), transcript variant 3, mRNA. (from RefSeq NM_001288767)
Z1819	-0.9023	NM_015349	uc003osp.1	GLTSCR1L	Homo sapiens GLTSCR1-like (GLTSCR1L), mRNA. (from RefSeq NM_015349)
Z216	-0.9046	NM_203494	uc021sky.2	USP50	Homo sapiens ubiquitin specific peptidase 50 (USP50), mRNA. (from RefSeq NM_203494)
Z1857	-0.9059	NR_106925	uc032erv.1	MIR6865	Homo sapiens microRNA 6865 (MIR6865), microRNA. (from RefSeq NR_106925)
Z271	-0.907	NM_175734	uc002ggw.4	C17orf74	Homo sapiens chromosome 17 open reading frame 74 (C17orf74), mRNA. (from RefSeq NM_175734)
Z4176	-0.9078	NR_024580	uc004cjg.1	CCDC183-AS1	Homo sapiens CCDC183 antisense RNA 1 (CCDC183-AS1), long non-coding RNA. (from RefSeq NR_024580)
Z3948	-0.9088	NM_001267868	uc060scm.1	HSD11B1L	Homo sapiens hydroxysteroid (11-beta) dehydrogenase 1-like (HSD11B1L), transcript variant g, mRNA. (from RefSeq NM_001267868)
Z4225	-0.9107	NM_001190438	uc002gpr.4	NCOR1	Homo sapiens nuclear receptor corepressor 1 (NCOR1), transcript variant 2, mRNA. (from RefSeq NM_001190438)
Z638	-0.913	NM_001142292	uc002swv.4	LMAN2L	Homo sapiens lectin, mannose-binding 2-like (LMAN2L), transcript variant 1, mRNA. (from RefSeq NM_001142292)
Z3695	-0.9169	NM_144666	uc001mdw.5	DNHD1	Homo sapiens dynein heavy chain domain 1 (DNHD1), transcript variant 1, mRNA. (from RefSeq NM_144666)
Z1079	-0.9186	NM_005220	uc002ipy.3	DLX3	Homo sapiens distal-less homeobox 3 (DLX3), mRNA. (from RefSeq NM_005220)
Z1080	-0.9186	NR_046200	uc031qxk.2	RP11-46C24.3	Homo sapiens uncharacterized LOC400558 (LOC400558), long non-coding RNA. (from RefSeq NR_046200)
Z428	-0.9199	NM_001080463	uc001phn.2	DYNC2H1	Homo sapiens dynein, cytoplasmic 2, heavy chain 1 (DYNC2H1), transcript variant 2, mRNA. (from RefSeq NM_001080463)
Z21	-0.9211	NM_016025	uc002dje.4	METTL9	Homo sapiens methyltransferase like 9 (METTL9), transcript variant 1, mRNA. (from RefSeq NM_016025)
Z2689	-0.9214	NM_001287749	uc011kxj.3	FDFT1	Homo sapiens farnesyl-diphosphate farnesyltransferase 1 (FDFT1), transcript variant 8, mRNA. (from RefSeq NM_001287749)
Z4478	-0.9221	NM_017890	uc003yiv.5	VPS13B	Homo sapiens vacuolar protein sorting 13 homolog B (yeast) (VPS13B), transcript variant 5, mRNA. (from RefSeq NM_017890)
Z747	-0.923	NR_038387	uc003fax.3	LINC00886	Homo sapiens long intergenic non-protein coding RNA 886 (LINC00886), long non-coding RNA. (from RefSeq NR_038387)
Z926	-0.9238	NM_001170726	uc010rni.3	GPR137	Homo sapiens G protein-coupled receptor 137 (GPR137), transcript variant 4, mRNA. (from RefSeq NM_001170726)
Z4731	-0.9239	NM_031421	uc032fin.2	TTC25	Homo sapiens tetratricopeptide repeat domain 25 (TTC25), transcript variant 1, mRNA. (from RefSeq NM_031421)
Z2294	-0.9249	NM_178443	uc001nyl.3	FERMT3	Homo sapiens fermitin family member 3 (FERMT3), transcript variant URP2LF, mRNA. (from RefSeq NM_178443)
Z1277	-0.925	NM_001099684	uc004drl.4	FAM156B	Homo sapiens family with sequence similarity 156, member B (FAM156B), mRNA. (from RefSeq NM_001099684)
Z3522	-0.9287	NR_027856	uc061rfy.1	CLK1	Homo sapiens CDC-like kinase 1 (CLK1), transcript variant 4, non-coding RNA. (from RefSeq NR_027856)
Z1005	-0.9291	NM_032680	uc001qmj.3	CRACR2A	Homo sapiens calcium release activated channel regulator 2A (CRACR2A), transcript variant 3, mRNA. (from RefSeq NM_032680)
Z912	-0.9304	NM_017993	uc001uzc.5	ENOX1	Homo sapiens ecto-NOX disulfide-thiol exchanger 1 (ENOX1), transcript variant 1, mRNA. (from RefSeq NM_017993)
Z1034	-0.9308	NM_005297	uc003ayz.4	MCHR1	Homo sapiens melanin-concentrating hormone receptor 1 (MCHR1), mRNA. (from RefSeq NM_005297)
Z3502	-0.934	NM_020226	uc003hmb.5	PRDM8	Homo sapiens PR domain containing 8 (PRDM8), transcript variant 1, mRNA. (from RefSeq NM_020226)
Z3885	-0.9345	NR_038991	uc001vle.4	RBM26-AS1	Homo sapiens RBM26 antisense RNA 1 (RBM26-AS1), long non-coding RNA. (from RefSeq NR_038991)
Z1622	-0.9352	NM_014037	uc002pmz.4	SLC6A16	Homo sapiens solute carrier family 6, member 16 (SLC6A16), mRNA. (from RefSeq NM_014037)
Z1160	-0.9353	NM_170707	uc001fni.4	LMNA	Homo sapiens lamin A/C (LMNA), transcript variant 1, mRNA. (from RefSeq NM_170707)
Z2268	-0.9359	NR_103717	uc031wvl.2	LINC01561	Homo sapiens long intergenic non-protein coding RNA 1561 (LINC01561), long non-coding RNA. (from RefSeq NR_103717)
Z3496	-0.9362	NM_001004439	uc002ari.4	ITGA11	Homo sapiens integrin, alpha 11 (ITGA11), mRNA. (from RefSeq NM_001004439)
Z3968	-0.9365	NM_001013742	uc033edr.2	DGKK	Homo sapiens diacylglycerol kinase, kappa (DGKK), mRNA. (from RefSeq NM_001013742)
Z1469	-0.9371	NM_152494	uc001fgn.3	DCST1	Homo sapiens DC-STAMP domain containing 1 (DCST1), transcript variant 1, mRNA. (from RefSeq NM_152494)
Z2435	-0.9373	NM_021194	uc001hio.2	SLC30A1	Homo sapiens solute carrier family 30 (zinc transporter), member 1 (SLC30A1), mRNA. (from RefSeq NM_021194)
Z1217	-0.9376	NM_001287747	uc010lsb.5	FDFT1	Homo sapiens farnesyl-diphosphate farnesyltransferase 1 (FDFT1), transcript variant 6, mRNA. (from RefSeq NM_001287747)
Z1168	-0.9382	NM_024410	uc003ykt.3	ODF1	Homo sapiens outer dense fiber of sperm tails 1 (ODF1), mRNA. (from RefSeq NM_024410)
Z3672	-0.9386	NM_175907	uc002llx.4	ZADH2	Homo sapiens zinc binding alcohol dehydrogenase domain containing 2 (ZADH2), transcript variant 1, mRNA. (from RefSeq NM_175907)
Z2782	-0.9408	NM_182492	uc062cmk.1	LRP5L	Homo sapiens low density lipoprotein receptor-related protein 5-like (LRP5L), transcript variant 1, mRNA. (from RefSeq NM_182492)
Z90	-0.9415	NM_001202559	uc059ckz.1	CHURC1-FNTB	Homo sapiens CHURC1-FNTB readthrough (CHURC1-FNTB), transcript variant 1, mRNA. (from RefSeq NM_001202559)
Z2492	-0.9425	NM_001301013	uc011ecs.3	EYA4	Homo sapiens EYA transcriptional coactivator and phosphatase 4 (EYA4), transcript variant 6, mRNA. (from RefSeq NM_001301013)
Z3748	-0.9428	NR_027255	uc010wul.1	AATK-AS1	Homo sapiens AATK antisense RNA 1 (AATK-AS1), long non-coding RNA. (from RefSeq NR_027255)
Z1155	-0.9439	NM_174914	uc003jjz.3	UGT3A2	Homo sapiens UDP glycosyltransferase 3 family, polypeptide A2 (UGT3A2), transcript variant 1, mRNA. (from RefSeq NM_174914)
Z3415	-0.945	NR_109957	uc032pag.1	LAMP5-AS1	Homo sapiens LAMP5 antisense RNA 1 (LAMP5-AS1), long non-coding RNA. (from RefSeq NR_109957)
Z2586	-0.9468	NM_005317	uc002low.3	GZMM	Homo sapiens granzyme M (lymphocyte met-ase 1) (GZMM), transcript variant 1, mRNA. (from RefSeq NM_005317)
Z2587	-0.9468	NM_001080456	uc010ygh.2	ZSCAN5B	Homo sapiens zinc finger and SCAN domain containing 5B (ZSCAN5B), mRNA. (from RefSeq NM_001080456)
Z925	-0.9493	NR_029702	uc010zog.2	MIR149	Homo sapiens microRNA 149 (MIR149), microRNA. (from RefSeq NR_029702)
Z2473	-0.9494	NM_001288731	uc033czy.2	DAPK1	Homo sapiens death-associated protein kinase 1 (DAPK1), transcript variant 4, mRNA. (from RefSeq NM_001288731)
Z959	-0.9512	NM_001286805	uc032tbo.2	TBC1D14	Homo sapiens TBC1 domain family, member 14 (TBC1D14), transcript variant 4, mRNA. (from RefSeq NM_001286805)
Z1221	-0.9516	NR_108100	uc032ibq.1	SPACA6P-AS	Homo sapiens SPACA6P antisense RNA (SPACA6P-AS), long non-coding RNA. (from RefSeq NR_108100)
Z2484	-0.9524	NR_024153	uc003vqo.1	LINC-PINT	Homo sapiens long intergenic non-protein coding RNA, p53 induced transcript (LINC-PINT), transcript variant 2, long non-coding RNA. (from RefSeq NR_024153)
Z2570	-0.9536	NR_039911	uc021wca.1	MIR4755	Homo sapiens microRNA 4755 (MIR4755), microRNA. (from RefSeq NR_039911)
Z2569	-0.9536	NR_125841	uc063pck.1	LINC01564	Homo sapiens long intergenic non-protein coding RNA 1564 (LINC01564), long non-coding RNA. (from RefSeq NR_125841)
Z1977	-0.9544	NM_000549	uc001efs.2	TSHB	Homo sapiens thyroid stimulating hormone, beta (TSHB), transcript variant 1, mRNA. (from RefSeq NM_000549)
Z2039	-0.9548	NM_001286534	uc001tre.6	RAD9B	Homo sapiens RAD9 homolog B (S. pombe) (RAD9B), transcript variant 5, mRNA. (from RefSeq NM_001286534)
Z197	-0.9562	NM_000037	uc003xoi.4	ANK1	Homo sapiens ankyrin 1, erythrocytic (ANK1), transcript variant 3, mRNA. (from RefSeq NM_000037)
Z4302	-0.9611	NM_138690	uc002lqo.2	GRIN3B	Homo sapiens glutamate receptor, ionotropic, N-methyl-D-aspartate 3B (GRIN3B), mRNA. (from RefSeq NM_138690)
Z1862	-0.9616	NM_001184960	uc011mjf.3	SH3KBP1	Homo sapiens SH3-domain kinase binding protein 1 (SH3KBP1), transcript variant 3, mRNA. (from RefSeq NM_001184960)
Z387	-0.9633	NM_198955	uc002jti.4	MGAT5B	Homo sapiens mannosyl (alpha-1,6-)-glycoprotein beta-1,6-N-acetyl-glucosaminyltransferase, isozyme B (MGAT5B), transcript variant 2, mRNA. (from RefSeq NM_198955)
Z163	-0.9664	NM_018342	uc003ipx.4	TMEM144	Homo sapiens transmembrane protein 144 (TMEM144), mRNA. (from RefSeq NM_018342)
Z205	-0.9676	NM_018891	uc001gpz.5	LAMC2	Homo sapiens laminin, gamma 2 (LAMC2), transcript variant 2, mRNA. (from RefSeq NM_018891)
Z3844	-0.9676	NR_039737	uc032chp.1	MIR4512	Homo sapiens microRNA 4512 (MIR4512), microRNA. (from RefSeq NR_039737)
Z907	-0.969	NR_036113	uc021pwn.1	MIR3157	Homo sapiens microRNA 3157 (MIR3157), microRNA. (from RefSeq NR_036113)
Z4482	-0.9857	NM_182628	uc003eiu.1	CCDC37	Homo sapiens coiled-coil domain containing 37 (CCDC37), mRNA. (from RefSeq NM_182628)
