# Supplementary material for: Antagonistic Interactions in Mitochondria ROS Signaling Responses to Manganese
Source: Antioxidants (Basel). 2023 Mar 25;12(4):804. doi: 10.3390/antiox12040804 (PMC10134992; doi:10.3390/antiox12040804)
Supplement: Supplementary file 1 [file antioxidants-12-00804-s001.zip › Table S2.xlsx]

## Sheet: Sheet1
Supplemental Table S2: Annotation of metabolic features associated with Community 1 (intracellular Mn) at |r|>0.8 (P<0.05)
Annotations are from xMSannotator with 10 ppm tolerance using HMDB and KEGG database. Many of the common metabolites have been previously confirmed by coelution and MS/MS relative to authentic standards but are considered here as annotations because MS/MS of adduct forms have not been confirmed.
Features without annotations deemed useful by the authors are listed as "unknown".
ID	|r|	m/z	RT (sec)	Annotation	Formula	Adduct	Chemical_ID	Annotation Score
Y447	-0.8621	158.097	77.5	Methylsalsolinol	C11H15NO2	M+H-2H2O	HMDB03626	4
Y1566	-0.8373	387.18	43.9	Carboxyleukotriene-B4	C20H30O6	M+Na[1+]	C05950	4
Y1106	-0.8711	272.931	135.7	Dichlorooxoadipate	C6H6Cl2O5	M+2Na-H	C18244	4
Y492	-0.8561	163.039	551.6	Oxoadipate	C6H8O5	M(S34)+H[1+]	C00322	4
Y1017	-0.8486	251.124	216.2	Hexenoic acid	C6H10O2	2M+Na	HMDB31501	4
Y1298	-0.9147	316.212	66.8	Hydroxytetradecanedioic acid	C14H26O5	M+ACN+H	HMDB00394	4
Y360	-0.9334	147.629	261.6	Androstane	C19H32O2	M(C13)+2H[2+]	CE2209	4
Y964	-0.9116	241.08	66.4	Glutamyl-alanine	C8H14N2O5	M+Na	HMDB06248	4
Y607	-0.9145	180.047	292.9	Phosphogluconic acid	C6H13O10P	M+2ACN+2H	HMDB01316	4
Y502	-0.8535	164.991	153.1	Alloxan	C4H2N2O4	M+Na	HMDB02818	4
Y619	0.8878	183.037	251.4	Aminomalonic acid	C3H5NO4	M+ACN+Na	HMDB01147	4
Y937	-0.8316	237.117	43.5	Asparaginyl-serine	C7H13N3O5	M+NH4	HMDB28740	4
Y706	-0.8437	195.062	230	Butenoic acid	C4H6O2	2M+Na	HMDB10720	4
Y2808	-0.8531	1060.67	86.7	CDP-bis-phytanylglycerol	C52H101N3O13P2	M+Na	C20627	4
Y2287	-0.8719	731.534	182.4	CL (18:0, 18:0, 18:1, 18:1)	C81H154O17P2	M+2H	HMDB56982	4
Y1700	-0.8646	431.004	173.6	CMP-2-aminoethylphosphonate	C11H20N4O10P2	M+H	HMDB60067	3
Y2129	0.9001	654.273	295	Coproporphyrin	C36H38N4O8	M[1+]	C05770	4
Y839	0.8842	217.637	43.4	CPA (16:0, 0:0)	C19H37O6P	M+ACN+2H	HMDB07003	4
Y963	-0.8383	241.031	260.1	Cystine	C6H12N2O4S2	M+H	HMDB00192	3
Y1662	-0.8748	416.058	66	Deoxyguanosine monophosphate	C10H14N5O7P	M+HCOONa[1+]	C00362	4
Y301	-0.9306	139.076	512	Diethyl succinate	C8H14O4	M+H-2H2O	HMDB33838	4
Y884	-0.9274	225.11	492.2	Dihydrolipoamide	C8H17NOS2	M+NH4	HMDB00985	4
Y670	-0.8875	189.98	514.1	Dimethyl trisulfide	C2H6S3	M+ACN+Na	HMDB13780	4
Y94	-0.9706	106.069	178.7	Dimethylglycine	C4H9NO2	M(Cl37)+H[1+]	C01026	4
Y744	-0.9804	201.185	548.7	Dodecanoic acid	C12H24O2	M+H	HMDB00638	3
Y2408	-0.9662	786.48	102	Ganglioside GD3 (18:1, 24:1)	C76H135N3O29	M+H+NH4	HMDB04917	4
Y602	-0.8671	179.054	253	Gluconolactone	C6H10O6	M+H	HMDB00150	3
Y1435	-0.8562	352.055	180.7	Glutathione	C10H17N3O6S	M+2Na-H	HMDB00125	4
Y1433	-0.9219	351.987	219.8	Glutathioselenol; GSSeH	C10H17N3O6SSe	M+H-2H2O	C18871	4
Y182	-0.8948	120.003	132.4	Glycine	C2H5NO2	M+2Na-H	HMDB00123	4
Y697	-0.8364	193.084	539.6	Guanine	C5H5N5O	M+ACN+H	HMDB00132	4
Y1264	0.8508	309.095	240.1	Heme	C34H32FeN4O4	M+2H	HMDB03178	4
Y903	0.9003	228.196	35.5	Heptadecanoylcarnitine	C24H47NO4	M+ACN+2H	HMDB06210	4
Y226	-0.8796	128.119	137	Hexadecenoate	C16H30O2	M+2H	HMDB60082	4
Y1392	-0.9703	341.003	370.1	Hexose bisphosphate	C6H14O12P2	M+H[1+]	C00354	4
Y241	-0.8556	131.023	262.5	Hexose phosphate	C6H13O9P	M+2H	HMDB00124	4
Y808	-0.8504	211.997	126.9	Homocysteinesulfinic acid	C4H9NO4S	M+2Na-H	HMDB06462	4
Y260	-0.8769	133.086	544.1	Hydroxyisocaproic acid	C6H12O3	M+H	HMDB00746	3
Y219	-0.8835	127.05	536	Imidazoleacetic acid	C5H6N2O2	M+H	HMDB02024	3
Y366	-0.9104	148.04	544.6	Indolequinone	C8H5NO2	M+H[1+]	C05579	4
Y1741	-0.8386	446.255	307.3	Isopentenyladenine glucoside	C17H25N5O4	M+2ACN+H	HMDB12240	4
Y551	-0.8505	172.061	47.6	Itaconic acid	C5H6O4	M+ACN+H	HMDB02092	4
Y391	0.8399	151.07	330.4	Aspartic acid	C4H7NO4	M+NH4	HMDB00191	4
Y1293	-0.8385	315.128	197.8	Glutamine	C5H10N2O3	2M+Na	HMDB00641	4
Y987	0.853	245.227	46	Linoleic acid	C18H32O2	M+H-2H2O	HMDB00673	4
Y1191	-0.8544	291.032	453.9	Malic acid	C4H6O5	2M+Na	HMDB00156	4
Y898	-0.9863	227.079	84.9	Tryptophan	C11H12N2O2	M+Na	HMDB00929	4
Y1834	-0.9629	494.325	214.4	LysoPC (16:1)	C24H48NO7P	M+H	HMDB10383	3
Y2661	-0.8684	925.521	134.1	LysoPE (16:1, 0:0)	C21H42NO7P	2M+Na	HMDB11504	4
Y1197	-0.8468	292.665	234.1	Mesoporphyrin IX	C34H38N4O4	M+H+NH4	HMDB02379	4
Y308	-0.8315	140.985	228.1	Methyl (methylthio)methyl disulfide	C3H8S3	M+H	HMDB31875	3
Y753	0.8737	202.144	42	MG (0:0, 22:6, 0:0)	C25H38O4	M+2H	HMDB11557	4
Y1469	-0.9272	359.316	226.9	MG (18:0, 0:0, 0:0)	C21H42O4	M+H	HMDB11131	3
Y1470	-0.8867	359.316	41.4	MG(18:00:00:0)	C21H42O4	M+H	HMDB11131	3
Y975	-0.8311	243.183	233.2	Methyllysine	C7H16N2O2	M+2ACN+H	HMDB02038	4
Y673	-0.8676	190.071	48	Acetylglutamic acid	C7H11NO5	M+H	HMDB01138	3
Y433	0.922	156.101	91	Acetylleucine	C8H15NO3	M+H-H2O	HMDB11756	4
Y772	-0.8428	206.09	434.2	Dimethylhistidine	C8H13N3O2	M+Na	C04259	4
Y892	0.9666	226.18	35.4	Undecanoylglycine	C13H25NO3	M+H-H2O	HMDB13286	2
Y982	0.9011	244.191	46.2	Undecanoylglycine	C13H25NO3	M+H	HMDB13286	2
Y539	-0.8995	170.154	100.8	Palmitic acid	C16H32O2	M+2ACN+2H	HMDB00220	4
Y1668	0.8634	418.799	123.2	PC (16:1, 18:3)	C42H76NO8P	M+2ACN+2H	HMDB08007	4
Y2425	-0.8399	793.557	159.5	PC (16:1, 18:4)	C42H74NO8P	M+ACN+H	HMDB08009	4
Y2222	-0.9503	704.506	119.2	PC (18:4, 15:0)	C41H74NO8P	M+H-2H2O	HMDB08231	4
Y1768	0.9143	454.846	210.8	PE (18:2, 24:1)	C47H88NO8P	M+2ACN+2H	HMDB09113	4
Y2486	-0.8522	817.59	178.4	PE (20:2, 18:1)	C43H80NO7P	M+ACN+Na	HMDB09314	4
Y2511	-0.9161	828.59	330	PE (22:1, 22:6)	C49H84NO8P	M+H-H2O	HMDB09540	4
Y446	-0.9591	157.994	229.8	Phosphoglycolic acid	C2H5O6P	M(C13)+H[1+]	C00988	4
Y2564	0.837	855.576	106.5	PI (16:0, 22:2)	C47H87O13P	M+H-2H2O	HMDB09791	4
Y2683	-0.8565	947.5	129.1	PIP (16:0, 22:5)	C47H82O16P2	M+H-H2O	HMDB09937	4
Y1907	0.9309	528.354	232.4	Prolyl-lysine	C11H21N3O3	2M+ACN+H	HMDB29022	4
Y1721	-0.8707	437.194	61.8	Prostaglandin E2	C20H32O5	M+HCOOK[1+]	C00584	4
Y56	-0.827	98.0714	78.3	Pyrimidine	C4H4N2	M+NH4	HMDB03361	4
Y383	0.8577	150.02	122.6	Quinolinic acid	C7H5NO4	M+H-H2O	HMDB00232	4
Y1606	-0.873	401.141	288.3	Reduced riboflavin	C17H22N4O6	M+Na[1+]	C01007	4
Y980	0.8817	244.023	245.3	Oxocarboxypropyl)cysteine	C7H11NO5S	M+Na	HMDB02135	4
Y155	-0.8875	117.048	48	Glycerophosphoethanolamine	C5H14NO6P	M+H+NH4	HMDB59660	4
Y893	-0.8674	226.217	35.1	Tetracosanoic acid	C24H48O2	M+2ACN+2H	HMDB02003	4
Y610	0.9063	181.93	99.5	Thiosulfate	HS2O3	M+HCOONa[1+]	C00320	4
Y2758	0.9469	1003.27	117.2	Enoyl-OPC4-CoA	C35H54N7O18P3S	M+NH4	HMDB11120	4
Y74	-0.876	101.108	78.1	Trimethylamine	C3H9N	M+ACN+H	HMDB00906	4
Y1437	0.8263	352.246	51.7	Undecanoylcarnitine	C18H35NO4	M+Na	HMDB13321	4
Y707	-0.8262	195.088	531.5	Uracil	C4H4N2O2	M+2ACN+H	HMDB00300	4
Y202	-0.8578	124.048	549.1	Urea	CH4N2O	M+ACN+Na	HMDB00294	4
Y404	-0.8782	153.041	47.8	Xanthine	C5H4N4O2	M+H	HMDB00292	3
Y1485	0.8432	364.038	178.6	Xanthosine phosphate	C10H13N4O9P	M[1+]	C00655	4
Y576	0.8288	175.942	540.8	Unknown	Unknown	Unknown	Unknown	Unknown
Y9	0.8602	88.0044	211.3	Unknown	Unknown	Unknown	Unknown	Unknown
Y15	-0.8812	88.9527	266.4	Unknown	Unknown	Unknown	Unknown	Unknown
Y37	-0.9774	92.3131	55.6	Unknown	Unknown	Unknown	Unknown	Unknown
Y54	0.8952	98.0137	270	Unknown	Unknown	Unknown	Unknown	Unknown
Y187	-0.8599	120.129	79	Unknown	Unknown	Unknown	Unknown	Unknown
Y194	-0.8732	122.524	255.5	Unknown	Unknown	Unknown	Unknown	Unknown
Y209	0.9276	124.862	224.4	Unknown	Unknown	Unknown	Unknown	Unknown
Y258	-0.9582	132.933	81.3	Unknown	Unknown	Unknown	Unknown	Unknown
Y337	-0.8571	145.017	259	Unknown	Unknown	Unknown	Unknown	Unknown
Y418	0.9234	154.6	197.9	Unknown	Unknown	Unknown	Unknown	Unknown
Y420	0.9243	154.967	363.4	Unknown	Unknown	Unknown	Unknown	Unknown
Y463	-0.8751	159.987	228.6	Unknown	Unknown	Unknown	Unknown	Unknown
Y603	-0.9623	179.064	494.1	Unknown	Unknown	Unknown	Unknown	Unknown
Y630	0.929	184.947	516.3	Unknown	Unknown	Unknown	Unknown	Unknown
Y684	-0.8444	191.886	117.8	Unknown	Unknown	Unknown	Unknown	Unknown
Y726	0.9085	198.876	126.8	Unknown	Unknown	Unknown	Unknown	Unknown
Y747	-0.8864	201.915	128.1	Unknown	Unknown	Unknown	Unknown	Unknown
Y810	0.9149	212.381	250.5	Unknown	Unknown	Unknown	Unknown	Unknown
Y837	-0.9871	216.632	273.7	Unknown	Unknown	Unknown	Unknown	Unknown
Y877	0.8419	224.129	245.6	Unknown	Unknown	Unknown	Unknown	Unknown
Y885	-0.8553	225.196	465.4	Unknown	Unknown	Unknown	Unknown	Unknown
Y978	-0.8955	243.942	174.5	Unknown	Unknown	Unknown	Unknown	Unknown
Y1009	-0.8222	249.052	295.4	Unknown	Unknown	Unknown	Unknown	Unknown
Y1023	0.8667	252.778	288.8	Unknown	Unknown	Unknown	Unknown	Unknown
Y1185	0.8305	289.493	287.7	Unknown	Unknown	Unknown	Unknown	Unknown
Y1189	-0.9689	290.782	119.4	Unknown	Unknown	Unknown	Unknown	Unknown
Y1190	-0.8802	290.803	127.8	Unknown	Unknown	Unknown	Unknown	Unknown
Y1199	0.8955	292.873	165.7	Unknown	Unknown	Unknown	Unknown	Unknown
Y1290	0.8744	314.342	75.9	Unknown	Unknown	Unknown	Unknown	Unknown
Y1442	0.8845	353.938	535.5	Unknown	Unknown	Unknown	Unknown	Unknown
Y1471	0.9484	359.938	513.3	Unknown	Unknown	Unknown	Unknown	Unknown
Y1826	-0.9327	488.869	169.4	Unknown	Unknown	Unknown	Unknown	Unknown
Y1891	-0.8708	519.128	183.6	Unknown	Unknown	Unknown	Unknown	Unknown
Y1910	-0.8206	528.987	86.3	Unknown	Unknown	Unknown	Unknown	Unknown
Y2132	-0.8364	654.717	111.3	Unknown	Unknown	Unknown	Unknown	Unknown
Y2141	0.9344	658.891	393.7	Unknown	Unknown	Unknown	Unknown	Unknown
Y2166	-0.9497	671.226	302	Unknown	Unknown	Unknown	Unknown	Unknown
Y2195	-0.9235	690.841	318.4	Unknown	Unknown	Unknown	Unknown	Unknown
Y2197	-0.946	692.482	117.8	Unknown	Unknown	Unknown	Unknown	Unknown
Y2253	-0.8793	713.223	343.8	Unknown	Unknown	Unknown	Unknown	Unknown
Y2277	-0.8492	721.814	175.9	Unknown	Unknown	Unknown	Unknown	Unknown
Y2421	-0.8743	791.79	296.4	Unknown	Unknown	Unknown	Unknown	Unknown
Y2557	-0.8444	853.314	176.5	Unknown	Unknown	Unknown	Unknown	Unknown
Y2636	-0.8845	907.457	90.6	Unknown	Unknown	Unknown	Unknown	Unknown
Y2858	0.8315	1140.18	109.1	Unknown	Unknown	Unknown	Unknown	Unknown
Y2880	-0.9621	1200.36	92.4	Unknown	Unknown	Unknown	Unknown	Unknown
Y2887	0.9183	1212.12	119.4	Unknown	Unknown	Unknown	Unknown	Unknown
Y2919	-0.8904	1262.32	93.2	Unknown	Unknown	Unknown	Unknown	Unknown
Y450	-0.8442	158.191	122.4	Unknown	Unknown	Unknown	Unknown	Unknown
Y1228	-0.8633	300.769	127.7	Unknown	Unknown	Unknown	Unknown	Unknown
Y1284	-0.9257	313.144	293.3	Unknown	Unknown	Unknown	Unknown	Unknown
Y1288	-0.8456	314.129	76.5	Unknown	Unknown	Unknown	Unknown	Unknown
Y1357	0.8878	332.331	62.6	Unknown	Unknown	Unknown	Unknown	Unknown
Y1405	0.8849	345.189	139.8	Unknown	Unknown	Unknown	Unknown	Unknown
Y1656	-0.8573	414.642	124.2	Unknown	Unknown	Unknown	Unknown	Unknown
Y1916	0.824	531.21	294.9	Unknown	Unknown	Unknown	Unknown	Unknown
Y2398	-0.8765	780.155	340.7	Unknown	Unknown	Unknown	Unknown	Unknown
Y2743	-0.8298	992.262	111	Unknown	Unknown	Unknown	Unknown	Unknown
Y2809	-0.8628	1061.23	116.7	Unknown	Unknown	Unknown	Unknown	Unknown
Y2847	-0.8601	1123.21	330.9	Unknown	Unknown	Unknown	Unknown	Unknown
Y17	0.8609	89.0084	282.2	Unknown	Unknown	Unknown	Unknown	Unknown
Y573	0.87	174.938	152.8	Unknown	Unknown	Unknown	Unknown	Unknown
Y1049	-0.8792	257.41	312.2	Unknown	Unknown	Unknown	Unknown	Unknown
Y1084	0.839	266.97	242.2	Unknown	Unknown	Unknown	Unknown	Unknown
Y1207	0.8588	294.863	489.8	Unknown	Unknown	Unknown	Unknown	Unknown
Y1242	-0.8328	303.874	133.4	Unknown	Unknown	Unknown	Unknown	Unknown
Y1320	0.8671	320.955	202.6	Unknown	Unknown	Unknown	Unknown	Unknown
Y1351	-0.8683	331.538	288.9	Unknown	Unknown	Unknown	Unknown	Unknown
Y1354	-0.8578	331.952	182.5	Unknown	Unknown	Unknown	Unknown	Unknown
Y1481	-0.8505	360.84	124.3	Unknown	Unknown	Unknown	Unknown	Unknown
Y1516	-0.8272	370.355	36.9	Unknown	Unknown	Unknown	Unknown	Unknown
Y1550	0.868	377.73	254.1	Unknown	Unknown	Unknown	Unknown	Unknown
Y1966	-0.8217	561.004	142.1	Unknown	Unknown	Unknown	Unknown	Unknown
Y1970	-0.8298	564.462	79.3	Unknown	Unknown	Unknown	Unknown	Unknown
Y2422	0.8418	792.811	176.5	Unknown	Unknown	Unknown	Unknown	Unknown
Y2430	-0.8381	796.077	181.6	Unknown	Unknown	Unknown	Unknown	Unknown
Y2594	-0.8999	870.849	89.7	Unknown	Unknown	Unknown	Unknown	Unknown
Y2633	0.8221	903.009	85.7	Unknown	Unknown	Unknown	Unknown	Unknown
Y2640	-0.8922	908.831	176.8	Unknown	Unknown	Unknown	Unknown	Unknown
Y69	-0.8438	100.516	228	Unkown	Unkown	Unkown	Unkown	Unkown
