# Supplementary material for: Antagonistic Interactions in Mitochondria ROS Signaling Responses to Manganese
Source: Antioxidants (Basel). 2023 Mar 25;12(4):804. doi: 10.3390/antiox12040804 (PMC10134992; doi:10.3390/antiox12040804)
Supplement: Supplementary file 1 [file antioxidants-12-00804-s001.zip › Table S3.xlsx]

## Sheet: Mitooxidativestress_Genes
Supplemental Table S3: Genes associated with Community 2a (mtOx) at |r|>0.8 (P<0.05)
note: Value of r below correlation threshold <0.8 is denoted as 0
ID	|r| mtROS	|r| mtH2O2	|r| SOD2	RefSeq ID	KEGG ID	Gene name	Gene_description
Z3622	-0.9863	-0.9361	-0.9629	NM_001171948	uc021uqq.1	KXD1	Homo sapiens KxDL motif containing 1 (KXD1), transcript variant 1, mRNA. (from RefSeq NM_001171948)
Z3496	-0.9808	-0.9786	-0.9943	NM_001004439	uc002ari.4	ITGA11	Homo sapiens integrin, alpha 11 (ITGA11), mRNA. (from RefSeq NM_001004439)
Z4346	-0.9758	-0.98	-0.9364	NM_205853	uc003dga.5	MUSTN1	Homo sapiens musculoskeletal, embryonic nuclear protein 1 (MUSTN1), mRNA. (from RefSeq NM_205853)
Z3954	-0.974	-0.9195	-0.9645	NM_016564	uc001lrh.2	CEND1	Homo sapiens cell cycle exit and neuronal differentiation 1 (CEND1), mRNA. (from RefSeq NM_016564)
Z4302	-0.9697	-0.9926	-0.9718	NM_138690	uc002lqo.2	GRIN3B	Homo sapiens glutamate receptor, ionotropic, N-methyl-D-aspartate 3B (GRIN3B), mRNA. (from RefSeq NM_138690)
Z1116	-0.9693	-0.9415	-0.908	NM_175617	uc002ejl.5	MT1E	Homo sapiens metallothionein 1E (MT1E), mRNA. (from RefSeq NM_175617)
Z2780	-0.9564	-0.8866	-0.9309	NM_001142300	uc002vci.4	CCNYL1	Homo sapiens cyclin Y-like 1 (CCNYL1), transcript variant 1, mRNA. (from RefSeq NM_001142300)
Z1980	-0.955	-0.8883	-0.9639	NM_016381	uc062jhx.1	TREX1	Homo sapiens three prime repair exonuclease 1 (TREX1), transcript variant 1, mRNA. (from RefSeq NM_016381)
Z90	-0.9533	-0.9912	-0.9492	NM_001202559	uc059ckz.1	CHURC1-FNTB	Homo sapiens CHURC1-FNTB readthrough (CHURC1-FNTB), transcript variant 1, mRNA. (from RefSeq NM_001202559)
Z3897	-0.9499	-0.9273	-0.9712	NM_002228	uc001cze.4	JUN	Homo sapiens jun proto-oncogene (JUN), mRNA. (from RefSeq NM_002228)
Z1425	-0.9494	-0.9627	-0.9242	NM_001165958	uc010cwj.4	GSDMB	Homo sapiens gasdermin B (GSDMB), transcript variant 3, mRNA. (from RefSeq NM_001165958)
Z551	-0.9488	-0.9071	-0.9273	NM_032387	uc002ibj.4	WNK4	Homo sapiens WNK lysine deficient protein kinase 4 (WNK4), mRNA. (from RefSeq NM_032387)
Z2268	-0.9477	-0.9588	-0.9733	NR_103717	uc031wvl.2	LINC01561	Homo sapiens long intergenic non-protein coding RNA 1561 (LINC01561), long non-coding RNA. (from RefSeq NR_103717)
Z3442	-0.9437	-0.9114	-0.9156	NM_001145118	uc011jwx.3	GRID2IP	Homo sapiens glutamate receptor, ionotropic, delta 2 (Grid2) interacting protein (GRID2IP), mRNA. (from RefSeq NM_001145118)
Z352	-0.9435	-0.8895	-0.9061	NM_016429	uc032flu.2	COPZ2	Homo sapiens coatomer protein complex, subunit zeta 2 (COPZ2), mRNA. (from RefSeq NM_016429)
Z4653	-0.943	-0.9329	-0.8985	NR_125991	uc057inz.1	RP11-147C23.1	Homo sapiens uncharacterized LOC102723661 (LOC102723661), long non-coding RNA. (from RefSeq NR_125991)
Z113	-0.9409	-0.9163	-0.8948	NM_201649	uc001cll.5	SLC6A9	Homo sapiens solute carrier family 6 (neurotransmitter transporter, glycine), member 9 (SLC6A9), transcript variant 2, mRNA. (from RefSeq NM_201649)
Z2098	-0.9395	-0.8603	-0.8918	NM_014952	uc001zlu.2	BAHD1	Homo sapiens bromo adjacent homology domain containing 1 (BAHD1), transcript variant 1, mRNA. (from RefSeq NM_014952)
Z3790	-0.938	-0.9441	-0.9198	NM_017594	uc004aqx.2	DIRAS2	Homo sapiens DIRAS family, GTP-binding RAS-like 2 (DIRAS2), mRNA. (from RefSeq NM_017594)
Z565	-0.9367	-0.8684	-0.911	NM_001142533	uc004bry.4	SH2D3C	Homo sapiens SH2 domain containing 3C (SH2D3C), transcript variant 5, mRNA. (from RefSeq NM_001142533)
Z974	-0.9352	-0.8691	-0.94	NM_006451	uc003job.4	PAIP1	Homo sapiens poly(A) binding protein interacting protein 1 (PAIP1), transcript variant 1, mRNA. (from RefSeq NM_006451)
Z4831	-0.9317	-0.8699	-0.9361	NM_001077494	uc001kvb.6	NFKB2	Homo sapiens nuclear factor of kappa light polypeptide gene enhancer in B-cells 2 (p49/p100) (NFKB2), transcript variant 1, mRNA. (from RefSeq NM_001077494)
Z4960	-0.9293	-0.9195	-0.9359	NM_001193612	uc002ixx.3	TUBD1	Homo sapiens tubulin, delta 1 (TUBD1), transcript variant 5, mRNA. (from RefSeq NM_001193612)
Z163	-0.9279	-0.9674	-0.9306	NM_018342	uc003ipx.4	TMEM144	Homo sapiens transmembrane protein 144 (TMEM144), mRNA. (from RefSeq NM_018342)
Z1215	-0.9273	-0.9525	-0.8931	NM_024308	uc002hnd.4	DHRS11	Homo sapiens dehydrogenase/reductase (SDR family) member 11 (DHRS11), mRNA. (from RefSeq NM_024308)
Z1970	-0.927	-0.8845	-0.8745	NM_001080471	uc001fqj.1	PEAR1	Homo sapiens platelet endothelial aggregation receptor 1 (PEAR1), mRNA. (from RefSeq NM_001080471)
Z3974	-0.9254	-0.8429	-0.8769	NM_001076552	uc010gey.3	ACSS2	Homo sapiens acyl-CoA synthetase short-chain family member 2 (ACSS2), transcript variant 2, mRNA. (from RefSeq NM_001076552)
Z3845	-0.9226	-0.8682	-0.8516	NM_000195	uc057vhd.1	HPS1	Homo sapiens Hermansky-Pudlak syndrome 1 (HPS1), transcript variant 1, mRNA. (from RefSeq NM_000195)
Z243	-0.9213	-0.9211	-0.885	NM_021199	uc001zvv.4	SQRDL	Homo sapiens sulfide quinone reductase-like (yeast) (SQRDL), transcript variant 1, mRNA. (from RefSeq NM_021199)
Z907	-0.9181	-0.9572	-0.9226	NR_036113	uc021pwn.1	MIR3157	Homo sapiens microRNA 3157 (MIR3157), microRNA. (from RefSeq NR_036113)
Z3672	-0.9148	-0.8754	-0.9501	NM_175907	uc002llx.4	ZADH2	Homo sapiens zinc binding alcohol dehydrogenase domain containing 2 (ZADH2), transcript variant 1, mRNA. (from RefSeq NM_175907)
Z197	-0.9124	-0.97	-0.9223	NM_000037	uc003xoi.4	ANK1	Homo sapiens ankyrin 1, erythrocytic (ANK1), transcript variant 3, mRNA. (from RefSeq NM_000037)
Z1217	-0.9095	-0.8988	-0.9214	NM_001287747	uc010lsb.5	FDFT1	Homo sapiens farnesyl-diphosphate farnesyltransferase 1 (FDFT1), transcript variant 6, mRNA. (from RefSeq NM_001287747)
Z1432	-0.9088	-0.8319	-0.8831	NM_001199747	uc002ukn.3	HOXD8	Homo sapiens homeobox D8 (HOXD8), transcript variant 3, mRNA. (from RefSeq NM_001199747)
Z248	-0.9051	0	-0.8999	NM_004265	uc001nsl.3	FADS2	Homo sapiens fatty acid desaturase 2 (FADS2), transcript variant 1, mRNA. (from RefSeq NM_004265)
Z819	-0.9038	-0.9115	-0.8735	NM_001136483	uc002ieg.4	C17orf105	Homo sapiens chromosome 17 open reading frame 105 (C17orf105), mRNA. (from RefSeq NM_001136483)
Z3652	-0.9034	-0.8795	-0.8613	NM_018973	uc001fhm.3	DPM3	Homo sapiens dolichyl-phosphate mannosyltransferase polypeptide 3 (DPM3), transcript variant 1, mRNA. (from RefSeq NM_018973)
Z205	-0.9023	-0.9585	-0.9145	NM_018891	uc001gpz.5	LAMC2	Homo sapiens laminin, gamma 2 (LAMC2), transcript variant 2, mRNA. (from RefSeq NM_018891)
Z747	-0.9022	-0.9227	-0.8919	NR_038387	uc003fax.3	LINC00886	Homo sapiens long intergenic non-protein coding RNA 886 (LINC00886), long non-coding RNA. (from RefSeq NR_038387)
Z2317	-0.902	-0.855	-0.9236	NM_003512	uc003ngm.4	HIST1H2AC	Homo sapiens histone cluster 1, H2ac (HIST1H2AC), mRNA. (from RefSeq NM_003512)
Z4689	-0.9002	0	-0.8884	NM_020372	uc001wjl.5	SLC22A17	Homo sapiens solute carrier family 22, member 17 (SLC22A17), transcript variant 1, mRNA. (from RefSeq NM_020372)
Z3079	-0.8973	0	-0.9308	NM_001271959	uc031pph.1	SLC39A1	Homo sapiens solute carrier family 39 (zinc transporter), member 1 (SLC39A1), transcript variant 4, mRNA. (from RefSeq NM_001271959)
Z4398	-0.8958	0	-0.8645	NR_047504	uc031zck.1	HOXC-AS1	Homo sapiens HOXC cluster antisense RNA 1 (HOXC-AS1), long non-coding RNA. (from RefSeq NR_047504)
Z1344	-0.895	-0.8952	-0.8645	NM_021620	uc003pqg.2	PRDM13	Homo sapiens PR domain containing 13 (PRDM13), mRNA. (from RefSeq NM_021620)
Z461	-0.8949	-0.8589	0	NR_104343	uc002gtt.3	FLJ35934	Homo sapiens FLJ35934 (FLJ35934), long non-coding RNA. (from RefSeq NR_104343)
Z815	-0.8926	-0.8761	-0.8562	NM_001098579	uc010rcb.2	MRVI1	Homo sapiens murine retrovirus integration site 1 homolog (MRVI1), transcript variant 1, mRNA. (from RefSeq NM_001098579)
Z1287	-0.8899	0	-0.8748	NM_001008226	uc002bgv.4	FAM154B	Homo sapiens stabilizer of axonemal microtubules 2 (SAXO2), mRNA. (from RefSeq NM_001008226)
Z681	-0.8895	-0.8665	-0.8506	NR_038332	uc002oss.4	CTC-378H22.1	Homo sapiens uncharacterized LOC100505622 (LOC100505622), long non-coding RNA. (from RefSeq NR_038332)
Z1689	-0.8887	-0.901	-0.8253	NM_001282707	uc010yjg.4	PDIA6	Homo sapiens protein disulfide isomerase family A, member 6 (PDIA6), transcript variant 5, mRNA. (from RefSeq NM_001282707)
Z1268	-0.8881	-0.8909	-0.8592	NR_110138	uc031wcr.1	LINC01452	Homo sapiens prostate cancer associated transcript 5 (non-protein coding) (PCAT5), long non-coding RNA. (from RefSeq NR_110138)
Z1515	-0.8873	-0.8959	-0.8602	NM_030766	uc001rae.4	BCL2L14	Homo sapiens BCL2-like 14 (apoptosis facilitator) (BCL2L14), transcript variant 2, mRNA. (from RefSeq NM_030766)
Z3550	-0.8861	-0.8957	-0.8532	NM_030613	uc003mjn.2	ZFP2	Homo sapiens ZFP2 zinc finger protein (ZFP2), mRNA. (from RefSeq NM_030613)
Z4176	-0.8855	-0.8601	-0.954	NR_024580	uc004cjg.1	CCDC183-AS1	Homo sapiens CCDC183 antisense RNA 1 (CCDC183-AS1), long non-coding RNA. (from RefSeq NR_024580)
Z1221	-0.8855	-0.885	-0.9395	NR_108100	uc032ibq.1	SPACA6P-AS	Homo sapiens SPACA6P antisense RNA (SPACA6P-AS), long non-coding RNA. (from RefSeq NR_108100)
Z2689	-0.8854	-0.8874	-0.9466	NM_001287749	uc011kxj.3	FDFT1	Homo sapiens farnesyl-diphosphate farnesyltransferase 1 (FDFT1), transcript variant 8, mRNA. (from RefSeq NM_001287749)
Z2082	-0.8849	-0.8953	-0.8476	NM_016239	uc060cbc.1	MYO15A	Homo sapiens myosin XVA (MYO15A), mRNA. (from RefSeq NM_016239)
Z1923	-0.8832	0	0	NR_106959	uc032qmg.1	MIR7109	Homo sapiens microRNA 7109 (MIR7109), microRNA. (from RefSeq NR_106959)
Z778	-0.8829	0	0	NM_001254758	uc021qry.2	ST3GAL4	Homo sapiens ST3 beta-galactoside alpha-2,3-sialyltransferase 4 (ST3GAL4), transcript variant 3, mRNA. (from RefSeq NM_001254758)
Z4706	-0.8824	0	-0.8894	NM_005598	uc001fwa.3	NHLH1	Homo sapiens nescient helix loop helix 1 (NHLH1), mRNA. (from RefSeq NM_005598)
Z1609	-0.8812	0	0	NM_002479	uc001gzd.5	MYOG	Homo sapiens myogenin (myogenic factor 4) (MYOG), mRNA. (from RefSeq NM_002479)
Z1608	-0.8812	0	0	NR_037449	uc021ucz.1	MIR3678	Homo sapiens microRNA 3678 (MIR3678), microRNA. (from RefSeq NR_037449)
Z1610	-0.8812	0	0	NR_039699	uc031vxh.1	MIR548AK	Homo sapiens microRNA 548ak (MIR548AK), microRNA. (from RefSeq NR_039699)
Z1611	-0.8812	0	0	NR_106831	uc032edj.1	MIR6773	Homo sapiens microRNA 6773 (MIR6773), microRNA. (from RefSeq NR_106831)
Z2045	-0.881	0	0	NR_036207	uc021umr.1	MIR4321	Homo sapiens microRNA 4321 (MIR4321), microRNA. (from RefSeq NR_036207)
Z3090	-0.8801	0	-0.901	NM_153219	uc002qlk.2	ZNF524	Homo sapiens zinc finger protein 524 (ZNF524), mRNA. (from RefSeq NM_153219)
Z905	-0.8801	0	0	NM_172109	uc002yfc.2	KCNQ2	Homo sapiens potassium channel, voltage gated KQT-like subfamily Q, member 2 (KCNQ2), transcript variant 5, mRNA. (from RefSeq NM_172109)
Z1883	-0.88	-0.838	-0.8245	NM_001170754	uc010oao.2	C1orf127	Homo sapiens chromosome 1 open reading frame 127 (C1orf127), mRNA. (from RefSeq NM_001170754)
Z1430	-0.8798	-0.891	-0.8545	NM_001012977	uc004ebg.3	PABPC1L2A	Homo sapiens poly(A) binding protein, cytoplasmic 1-like 2A (PABPC1L2A), mRNA. (from RefSeq NM_001012977)
Z1428	-0.8798	-0.891	-0.8545	NM_032344	uc001nyp.6	NUDT22	Homo sapiens nudix (nucleoside diphosphate linked moiety X)-type motif 22 (NUDT22), transcript variant 1, mRNA. (from RefSeq NM_032344)
Z1429	-0.8798	-0.891	-0.8545	NR_030366	uc021udo.1	MIR636	Homo sapiens microRNA 636 (MIR636), microRNA. (from RefSeq NR_030366)
Z3013	-0.8789	0	0	NM_001278683	uc003eqf.4	AMOTL2	Homo sapiens angiomotin like 2 (AMOTL2), transcript variant 1, mRNA. (from RefSeq NM_001278683)
Z3014	-0.8789	0	0	NM_001286175	uc010sir.4	C2CD5	Homo sapiens C2 calcium-dependent domain containing 5 (C2CD5), transcript variant 3, mRNA. (from RefSeq NM_001286175)
Z3016	-0.8789	0	0	NM_001029883	uc002rmt.3	C2orf71	Homo sapiens chromosome 2 open reading frame 71 (C2orf71), mRNA. (from RefSeq NM_001029883)
Z4943	-0.8789	-0.8824	-0.9209	NM_000660	uc002oqh.4	TGFB1	Homo sapiens transforming growth factor, beta 1 (TGFB1), mRNA. (from RefSeq NM_000660)
Z3015	-0.8789	0	0	NM_001168409	uc010kar.4	RIMS1	Homo sapiens regulating synaptic membrane exocytosis 1 (RIMS1), transcript variant 4, mRNA. (from RefSeq NM_001168409)
Z2154	-0.8783	0	-0.821	NM_001301267	uc002ejv.2	MT1G	Homo sapiens metallothionein 1G (MT1G), transcript variant 2, mRNA. (from RefSeq NM_001301267)
Z3155	-0.8778	0	0	NM_001276378	uc003coy.3	LZTFL1	Homo sapiens leucine zipper transcription factor-like 1 (LZTFL1), transcript variant 2, mRNA. (from RefSeq NM_001276378)
Z3158	-0.8778	0	0	NM_002638	uc002xng.4	PI3	Homo sapiens peptidase inhibitor 3, skin-derived (PI3), mRNA. (from RefSeq NM_002638)
Z3159	-0.8778	0	0	NM_006202	uc002mom.3	PDE4A	Homo sapiens phosphodiesterase 4A, cAMP-specific (PDE4A), transcript variant 4, mRNA. (from RefSeq NM_006202)
Z3161	-0.8778	0	0	NM_006418	uc001vhl.4	OLFM4	Homo sapiens olfactomedin 4 (OLFM4), mRNA. (from RefSeq NM_006418)
Z3160	-0.8778	0	0	NM_018302	uc003gsy.5	C4orf19	Homo sapiens chromosome 4 open reading frame 19 (C4orf19), transcript variant 2, mRNA. (from RefSeq NM_018302)
Z3156	-0.8778	0	0	NM_022659	uc003xes.3	EBF2	Homo sapiens early B-cell factor 2 (EBF2), mRNA. (from RefSeq NM_022659)
Z440	-0.8778	0	0	NM_177528	uc002dqg.3	SULT1A2	Homo sapiens sulfotransferase family, cytosolic, 1A, phenol-preferring, member 2 (SULT1A2), transcript variant 2, mRNA. (from RefSeq NM_177528)
Z3157	-0.8778	0	0	NR_024419	uc010wzm.1	RP11-789C17.3	Homo sapiens uncharacterized LOC100192426 (LOC100192426), long non-coding RNA. (from RefSeq NR_024419)
Z3153	-0.8778	0	0	NR_104086	uc031uoz.1	RNVU1-19	Homo sapiens RNA, variant U1 small nuclear 19 (RNVU1-19), small nuclear RNA. (from RefSeq NR_104086)
Z3162	-0.8778	0	0	NR_106884	uc032sbz.1	MIR6826	Homo sapiens microRNA 6826 (MIR6826), microRNA. (from RefSeq NR_106884)
Z3154	-0.8778	0	0	NM_000798	uc003gmb.5	DRD5	Homo sapiens dopamine receptor D5 (DRD5), mRNA. (from RefSeq NM_000798)
Z213	-0.8768	0	0	NM_001003927	uc002hgl.4	EVI2A	Homo sapiens ecotropic viral integration site 2A (EVI2A), transcript variant 1, mRNA. (from RefSeq NM_001003927)
Z4700	-0.8746	0	-0.8876	NM_001136509	uc010vfm.2	ZNF843	Homo sapiens zinc finger protein 843 (ZNF843), mRNA. (from RefSeq NM_001136509)
Z1155	-0.8743	-0.943	-0.8922	NM_174914	uc003jjz.3	UGT3A2	Homo sapiens UDP glycosyltransferase 3 family, polypeptide A2 (UGT3A2), transcript variant 1, mRNA. (from RefSeq NM_174914)
Z3928	-0.8713	0	-0.8893	NM_174905	uc002oin.2	FAM98C	Homo sapiens family with sequence similarity 98, member C (FAM98C), mRNA. (from RefSeq NM_174905)
Z2609	-0.871	0	0	NM_001287136	uc010les.3	CDK14	Homo sapiens cyclin-dependent kinase 14 (CDK14), transcript variant 3, mRNA. (from RefSeq NM_001287136)
Z2603	-0.871	0	0	NM_022904	uc002nbe.3	RASAL3	Homo sapiens RAS protein activator like 3 (RASAL3), mRNA. (from RefSeq NM_022904)
Z2606	-0.871	0	0	NM_080588	uc001gxl.2	PTPN7	Homo sapiens protein tyrosine phosphatase, non-receptor type 7 (PTPN7), transcript variant 2, mRNA. (from RefSeq NM_080588)
Z2604	-0.871	0	0	NM_173833	uc003xgj.4	SCARA5	Homo sapiens scavenger receptor class A, member 5 (SCARA5), mRNA. (from RefSeq NM_173833)
Z2607	-0.871	0	0	NR_039919	uc021wrl.1	MIR4762	Homo sapiens microRNA 4762 (MIR4762), microRNA. (from RefSeq NR_039919)
Z2605	-0.871	0	0	NR_108085	uc031xse.2	OVOL1-AS1	Homo sapiens OVOL1 antisense RNA 1 (OVOL1-AS1), long non-coding RNA. (from RefSeq NR_108085)
Z2608	-0.871	0	0	NM_001102669	uc009ygq.4	RRAS2	Homo sapiens related RAS viral (r-ras) oncogene homolog 2 (RRAS2), transcript variant 2, mRNA. (from RefSeq NM_001102669)
Z3331	-0.8703	-0.8853	-0.8716	NM_001301171	uc010uen.3	SHF	Homo sapiens Src homology 2 domain containing F (SHF), transcript variant 5, mRNA. (from RefSeq NM_001301171)
Z466	-0.87	-0.8863	-0.8473	NR_047550	uc031pyq.2	RP11-23F23.2	Homo sapiens uncharacterized LOC100506082 (LOC100506082), long non-coding RNA. (from RefSeq NR_047550)
Z3188	-0.8699	-0.8678	-0.8617	NM_005608	uc001oli.2	PTPRCAP	Homo sapiens protein tyrosine phosphatase, receptor type, C-associated protein (PTPRCAP), mRNA. (from RefSeq NM_005608)
Z3789	-0.8699	-0.8287	-0.8396	NM_203344	uc002onv.5	SERTAD3	Homo sapiens SERTA domain containing 3 (SERTAD3), transcript variant 2, mRNA. (from RefSeq NM_203344)
Z2729	-0.8692	0	0	NR_015376	uc010qag.1	LINC00200	Homo sapiens long intergenic non-protein coding RNA 200 (LINC00200), long non-coding RNA. (from RefSeq NR_015376)
Z2734	-0.8692	0	0	NR_106717	uc032qmw.1	MIR6069	Homo sapiens microRNA 6069 (MIR6069), microRNA. (from RefSeq NR_106717)
Z2733	-0.8692	0	0	NR_106794	uc031utk.1	MIR6736	Homo sapiens microRNA 6736 (MIR6736), microRNA. (from RefSeq NR_106794)
Z2728	-0.8692	0	0	NR_106880	uc032rkc.1	MIR6822	Homo sapiens microRNA 6822 (MIR6822), microRNA. (from RefSeq NR_106880)
Z2731	-0.8692	0	0	NR_111906	uc061xsk.1	RP4-530I15.6	Homo sapiens uncharacterized LOC100506175 (LOC100506175), long non-coding RNA. (from RefSeq NR_111906)
Z2730	-0.8692	0	0	NM_001144070	uc002isk.5	ABCC3	Homo sapiens ATP-binding cassette, sub-family C (CFTR/MRP), member 3 (ABCC3), transcript variant 2, mRNA. (from RefSeq NM_001144070)
Z2732	-0.8692	0	0	NM_001001711	uc001phr.3	DDI1	Homo sapiens DNA-damage inducible 1 homolog 1 (S. cerevisiae) (DDI1), mRNA. (from RefSeq NM_001001711)
Z4626	-0.8688	0	-0.8492	NR_015380	uc002qsg.3	A1BG-AS1	Homo sapiens A1BG antisense RNA 1 (A1BG-AS1), long non-coding RNA. (from RefSeq NR_015380)
Z4819	-0.8682	-0.8519	-0.8354	NR_121579	uc004cfy.3	RP11-426A6.5	Homo sapiens uncharacterized LOC101928525 (LOC101928525), long non-coding RNA. (from RefSeq NR_121579)
Z3415	-0.8677	-0.8429	-0.8999	NR_109957	uc032pag.1	LAMP5-AS1	Homo sapiens LAMP5 antisense RNA 1 (LAMP5-AS1), long non-coding RNA. (from RefSeq NR_109957)
Z3616	-0.8668	-0.9119	-0.829	NM_001286522	uc001qmm.4	PARP11	Homo sapiens poly (ADP-ribose) polymerase family, member 11 (PARP11), transcript variant 3, mRNA. (from RefSeq NM_001286522)
Z988	-0.8662	0	-0.9243	NM_001130055	uc011lkk.2	EEF1D	Homo sapiens eukaryotic translation elongation factor 1 delta (guanine nucleotide exchange protein) (EEF1D), transcript variant 5, mRNA. (from RefSeq NM_001130055)
Z2552	-0.8646	-0.8203	0	NR_026674	uc010vos.2	FLJ30679	Homo sapiens uncharacterized protein FLJ30679 (FLJ30679), long non-coding RNA. (from RefSeq NR_026674)
Z1987	-0.8644	-0.8647	-0.8372	NM_001894	uc003avk.3	CSNK1E	Homo sapiens casein kinase 1, epsilon (CSNK1E), transcript variant 2, mRNA. (from RefSeq NM_001894)
Z1986	-0.8644	-0.8647	-0.8372	NM_005430	uc001rsu.4	WNT1	Homo sapiens wingless-type MMTV integration site family, member 1 (WNT1), mRNA. (from RefSeq NM_005430)
Z222	-0.8639	-0.8204	0	NM_001286470	uc001xza.4	C14orf159	Homo sapiens chromosome 14 open reading frame 159 (C14orf159), transcript variant 6, mRNA. (from RefSeq NM_001286470)
Z4323	-0.861	-0.8874	-0.8292	NM_001136571	uc010abc.1	ZAR1L	Homo sapiens zygote arrest 1-like (ZAR1L), mRNA. (from RefSeq NM_001136571)
Z2118	-0.8608	-0.8416	-0.8453	NR_110943	uc002fkc.3	RP11-482M8.1	Homo sapiens uncharacterized LOC101928737 (LOC101928737), long non-coding RNA. (from RefSeq NR_110943)
Z471	-0.8605	-0.884	-0.8405	NM_001251935	uc009yll.3	NR1H3	Homo sapiens nuclear receptor subfamily 1, group H, member 3 (NR1H3), transcript variant 5, mRNA. (from RefSeq NM_001251935)
Z925	-0.8603	-0.9263	-0.8798	NR_029702	uc010zog.2	MIR149	Homo sapiens microRNA 149 (MIR149), microRNA. (from RefSeq NR_029702)
Z3960	-0.8601	0	0	NM_001042403	uc001teg.5	USP44	Homo sapiens ubiquitin specific peptidase 44 (USP44), transcript variant 2, mRNA. (from RefSeq NM_001042403)
Z2052	-0.86	-0.8604	-0.8333	NR_015377	uc002tjr.6	PAX8-AS1	Homo sapiens PAX8 antisense RNA 1 (PAX8-AS1), transcript variant 1, long non-coding RNA. (from RefSeq NR_015377)
Z3691	-0.8589	0	-0.8342	NM_002686	uc002hsi.3	PNMT	Homo sapiens phenylethanolamine N-methyltransferase (PNMT), transcript variant 1, mRNA. (from RefSeq NM_002686)
Z2264	-0.8587	-0.8682	-0.8353	NM_001128929	uc062lpj.1	ROBO2	Homo sapiens roundabout, axon guidance receptor, homolog 2 (Drosophila) (ROBO2), transcript variant 1, mRNA. (from RefSeq NM_001128929)
Z1316	-0.8568	-0.8366	-0.8221	NR_026985	uc010osm.4	LINC01140	Homo sapiens long intergenic non-protein coding RNA 1140 (LINC01140), transcript variant 1, long non-coding RNA. (from RefSeq NR_026985)
Z1889	-0.856	-0.8591	-0.8307	NM_001007122	uc002bjd.4	FSD2	Homo sapiens fibronectin type III and SPRY domain containing 2 (FSD2), transcript variant 1, mRNA. (from RefSeq NM_001007122)
Z1890	-0.856	-0.8591	-0.8307	NM_021110	uc003yox.5	COL14A1	Homo sapiens collagen, type XIV, alpha 1 (COL14A1), mRNA. (from RefSeq NM_021110)
Z2933	-0.8559	0	-0.9004	NM_001286704	uc032ack.2	UFM1	Homo sapiens ubiquitin-fold modifier 1 (UFM1), transcript variant 3, mRNA. (from RefSeq NM_001286704)
Z649	-0.855	0	-0.9233	NR_028328	uc001pjo.2	ELMOD1	Homo sapiens uncharacterized LOC643923 (LOC643923), long non-coding RNA. (from RefSeq NR_028328)
Z698	-0.8548	0	0	NR_039741	uc021taq.1	MIR4516	Homo sapiens microRNA 4516 (MIR4516), microRNA. (from RefSeq NR_039741)
Z3828	-0.854	0	-0.8304	NR_027108	uc003mcp.6	CTB-33O18.3	Homo sapiens uncharacterized LOC285593 (LOC285593), transcript variant 1, long non-coding RNA. (from RefSeq NR_027108)
Z1303	-0.8539	0	-0.92	NR_046205	uc003xia.3	RBPMS-AS1	Homo sapiens RBPMS antisense RNA 1 (RBPMS-AS1), long non-coding RNA. (from RefSeq NR_046205)
Z3748	-0.8528	-0.8351	-0.9321	NR_027255	uc010wul.1	AATK-AS1	Homo sapiens AATK antisense RNA 1 (AATK-AS1), long non-coding RNA. (from RefSeq NR_027255)
Z3427	-0.8526	0	-0.8715	NM_175575	uc002isv.5	WFIKKN2	Homo sapiens WAP, follistatin/kazal, immunoglobulin, kunitz and netrin domain containing 2 (WFIKKN2), mRNA. (from RefSeq NM_175575)
Z879	-0.8524	-0.8224	0	NM_004668	uc003vwy.4	MGAM	Homo sapiens maltase-glucoamylase (MGAM), mRNA. (from RefSeq NM_004668)
Z4676	-0.8519	0	-0.8815	NM_020378	uc002qle.3	NAT14	Homo sapiens N-acetyltransferase 14 (GCN5-related, putative) (NAT14), mRNA. (from RefSeq NM_020378)
Z1949	-0.8515	-0.8547	-0.8267	NM_003087	uc001keb.3	SNCG	Homo sapiens synuclein, gamma (breast cancer-specific protein 1) (SNCG), mRNA. (from RefSeq NM_003087)
Z1017	-0.8509	-0.824	0	NM_019599	uc003jem.2	TAS2R1	Homo sapiens taste receptor, type 2, member 1 (TAS2R1), mRNA. (from RefSeq NM_019599)
Z1227	-0.8504	-0.8329	0	NM_001886	uc003acz.4	CRYBA4	Homo sapiens crystallin, beta A4 (CRYBA4), mRNA. (from RefSeq NM_001886)
Z1228	-0.8504	-0.8329	0	NR_033337	uc021tkx.1	SNORA70D	Homo sapiens small nucleolar RNA, H/ACA box 70D (SNORA70D), small nucleolar RNA. (from RefSeq NR_033337)
Z959	-0.8503	-0.8838	-0.8601	NM_001286805	uc032tbo.2	TBC1D14	Homo sapiens TBC1 domain family, member 14 (TBC1D14), transcript variant 4, mRNA. (from RefSeq NM_001286805)
Z2141	-0.8496	-0.8619	-0.8281	NM_006033	uc002ldv.4	LIPG	Homo sapiens lipase, endothelial (LIPG), transcript variant 1, mRNA. (from RefSeq NM_006033)
Z2930	-0.8495	0	-0.8252	NM_001080434	uc002pjk.3	LMTK3	Homo sapiens lemur tyrosine kinase 3 (LMTK3), mRNA. (from RefSeq NM_001080434)
Z3697	-0.8484	0	-0.8538	NM_004185	uc001eca.4	WNT2B	Homo sapiens wingless-type MMTV integration site family, member 2B (WNT2B), transcript variant WNT-2B1, mRNA. (from RefSeq NM_004185)
Z838	-0.8472	0	0	NR_033833	uc002bfo.4	LINC00927	Homo sapiens long intergenic non-protein coding RNA 927 (LINC00927), long non-coding RNA. (from RefSeq NR_033833)
Z839	-0.8472	0	0	NM_001113226	uc001dvh.5	NTNG1	Homo sapiens netrin G1 (NTNG1), transcript variant 1, mRNA. (from RefSeq NM_001113226)
Z3632	-0.8468	-0.8663	0	NM_001281719	uc032evq.2	UBB	Homo sapiens ubiquitin B (UBB), transcript variant 5, mRNA. (from RefSeq NM_001281719)
Z1862	-0.8465	-0.9117	-0.869	NM_001184960	uc011mjf.3	SH3KBP1	Homo sapiens SH3-domain kinase binding protein 1 (SH3KBP1), transcript variant 3, mRNA. (from RefSeq NM_001184960)
Z387	-0.8459	-0.9093	-0.8677	NM_198955	uc002jti.4	MGAT5B	Homo sapiens mannosyl (alpha-1,6-)-glycoprotein beta-1,6-N-acetyl-glucosaminyltransferase, isozyme B (MGAT5B), transcript variant 2, mRNA. (from RefSeq NM_198955)
Z3844	-0.8448	-0.8995	-0.9081	NR_039737	uc032chp.1	MIR4512	Homo sapiens microRNA 4512 (MIR4512), microRNA. (from RefSeq NR_039737)
Z3313	-0.8444	-0.8874	0	NM_025045	uc003auw.4	BAIAP2L2	Homo sapiens BAI1-associated protein 2-like 2 (BAIAP2L2), mRNA. (from RefSeq NM_025045)
Z2288	-0.8431	0	0	NR_002598	uc064nkw.1	SNORD87	Homo sapiens small nucleolar RNA, C/D box 87 (SNORD87), small nucleolar RNA. (from RefSeq NR_002598)
Z4006	-0.8414	0	0	NM_001130487	uc002enm.4	NDRG4	Homo sapiens NDRG family member 4 (NDRG4), transcript variant 2, mRNA. (from RefSeq NM_001130487)
Z1458	-0.8413	0	0	NM_016615	uc001qic.3	SLC6A13	Homo sapiens solute carrier family 6 (neurotransmitter transporter), member 13 (SLC6A13), transcript variant 1, mRNA. (from RefSeq NM_016615)
Z1746	-0.8413	0	-0.8756	NM_030907	uc001ayd.4	RSG1	Homo sapiens REM2 and RAB-like small GTPase 1 (RSG1), mRNA. (from RefSeq NM_030907)
Z4952	-0.8406	0	-0.8706	NM_001294	uc002pai.5	CLPTM1	Homo sapiens cleft lip and palate associated transmembrane protein 1 (CLPTM1), transcript variant 2, mRNA. (from RefSeq NM_001294)
Z3725	-0.8399	0	-0.8913	NM_001282533	uc002wib.3	LZTS3	Homo sapiens leucine zipper, putative tumor suppressor family member 3 (LZTS3), mRNA. (from RefSeq NM_001282533)
Z3471	-0.8394	0	-0.8933	NM_003609	uc002dve.4	HIRIP3	Homo sapiens HIRA interacting protein 3 (HIRIP3), transcript variant 1, mRNA. (from RefSeq NM_003609)
Z1705	-0.8387	-0.8429	0	NM_001807	uc010naa.3	CEL	Homo sapiens carboxyl ester lipase (CEL), mRNA. (from RefSeq NM_001807)
Z2039	-0.8383	-0.9117	-0.8639	NM_001286534	uc001tre.6	RAD9B	Homo sapiens RAD9 homolog B (S. pombe) (RAD9B), transcript variant 5, mRNA. (from RefSeq NM_001286534)
Z3885	-0.8372	0	-0.9201	NR_038991	uc001vle.4	RBM26-AS1	Homo sapiens RBM26 antisense RNA 1 (RBM26-AS1), long non-coding RNA. (from RefSeq NR_038991)
Z3695	-0.8371	0	-0.8934	NM_144666	uc001mdw.5	DNHD1	Homo sapiens dynein heavy chain domain 1 (DNHD1), transcript variant 1, mRNA. (from RefSeq NM_144666)
Z3100	-0.8369	0	-0.8369	NM_001002836	uc032igd.1	ZNF787	Homo sapiens zinc finger protein 787 (ZNF787), mRNA. (from RefSeq NM_001002836)
Z3178	-0.8367	0	-0.8976	NM_001166599	uc004exr.4	FAM122B	Homo sapiens family with sequence similarity 122B (FAM122B), transcript variant 2, mRNA. (from RefSeq NM_001166599)
Z1257	-0.8346	-0.8843	-0.8451	NM_001297422	uc010sdu.2	RAD52	Homo sapiens RAD52 homolog (S. cerevisiae) (RAD52), transcript variant 5, mRNA. (from RefSeq NM_001297422)
Z2868	-0.8342	-0.8243	-0.8749	NM_005622	uc002dhr.4	ACSM3	Homo sapiens acyl-CoA synthetase medium-chain family member 3 (ACSM3), transcript variant 1, mRNA. (from RefSeq NM_005622)
Z3894	-0.8336	0	0	NM_173564	uc003uvd.3	NYAP1	Homo sapiens neuronal tyrosine-phosphorylated phosphoinositide-3-kinase adaptor 1 (NYAP1), mRNA. (from RefSeq NM_173564)
Z1977	-0.8336	-0.9093	-0.8606	NM_000549	uc001efs.2	TSHB	Homo sapiens thyroid stimulating hormone, beta (TSHB), transcript variant 1, mRNA. (from RefSeq NM_000549)
Z3603	-0.8322	0	-0.8568	NM_032587	uc003jmg.4	CARD6	Homo sapiens caspase recruitment domain family, member 6 (CARD6), mRNA. (from RefSeq NM_032587)
Z3502	-0.8316	-0.8418	-0.8443	NM_020226	uc003hmb.5	PRDM8	Homo sapiens PR domain containing 8 (PRDM8), transcript variant 1, mRNA. (from RefSeq NM_020226)
Z3852	-0.8301	0	-0.8625	NM_001174164	uc022aky.2	PRRT4	Homo sapiens proline-rich transmembrane protein 4 (PRRT4), transcript variant 1, mRNA. (from RefSeq NM_001174164)
Z4259	-0.8297	0	-0.8341	NM_000784	uc002viz.5	CYP27A1	Homo sapiens cytochrome P450, family 27, subfamily A, polypeptide 1 (CYP27A1), mRNA. (from RefSeq NM_000784)
Z1280	-0.8294	0	-0.9129	NM_021978	uc001qfw.4	ST14	Homo sapiens suppression of tumorigenicity 14 (colon carcinoma) (ST14), mRNA. (from RefSeq NM_021978)
Z2672	-0.8292	-0.8793	-0.8466	NM_001178115	uc004fgx.4	ZNF185	Homo sapiens zinc finger protein 185 (LIM domain) (ZNF185), transcript variant 9, mRNA. (from RefSeq NM_001178115)
Z3611	-0.8288	0	-0.8269	NM_003378	uc003uxx.5	VGF	Homo sapiens VGF nerve growth factor inducible (VGF), mRNA. (from RefSeq NM_003378)
Z1085	-0.8282	0	0	NM_178822	uc011bod.3	IGSF10	Homo sapiens immunoglobulin superfamily, member 10 (IGSF10), transcript variant 1, mRNA. (from RefSeq NM_178822)
Z4482	-0.8273	-0.8585	-0.8818	NM_182628	uc003eiu.1	CCDC37	Homo sapiens coiled-coil domain containing 37 (CCDC37), mRNA. (from RefSeq NM_182628)
Z1469	-0.8268	-0.8548	-0.836	NM_152494	uc001fgn.3	DCST1	Homo sapiens DC-STAMP domain containing 1 (DCST1), transcript variant 1, mRNA. (from RefSeq NM_152494)
Z4983	-0.8266	0	0	NR_036137	uc021szr.1	MIR3176	Homo sapiens microRNA 3176 (MIR3176), microRNA. (from RefSeq NR_036137)
Z3404	-0.8264	-0.831	-0.8413	NM_003660	uc002pmr.5	PPFIA3	Homo sapiens protein tyrosine phosphatase, receptor type, f polypeptide (PTPRF), interacting protein (liprin), alpha 3 (PPFIA3), transcript variant 1, mRNA. (from RefSeq NM_003660)
Z3012	-0.8254	0	-0.8617	NM_032140	uc002etw.2	ENKD1	Homo sapiens enkurin domain containing 1 (ENKD1), mRNA. (from RefSeq NM_032140)
Z1154	-0.8246	0	0	NM_001013734	uc003pvx.1	RFPL4B	Homo sapiens ret finger protein-like 4B (RFPL4B), mRNA. (from RefSeq NM_001013734)
Z1153	-0.8246	0	0	NM_015976	uc010ouc.3	SNX7	Homo sapiens sorting nexin 7 (SNX7), transcript variant 1, mRNA. (from RefSeq NM_015976)
Z1151	-0.8246	0	0	NM_198714	uc001dfg.2	PTGER3	Homo sapiens prostaglandin E receptor 3 (subtype EP3) (PTGER3), transcript variant 4, mRNA. (from RefSeq NM_198714)
Z1152	-0.8246	0	0	NR_125403	uc062rom.1	RP11-513G11.4	Homo sapiens uncharacterized LOC100505920 (LOC100505920), transcript variant 1, long non-coding RNA. (from RefSeq NR_125403)
Z4853	-0.8233	0	0	NM_025244	uc002szi.5	TSGA10	Homo sapiens testis specific, 10 (TSGA10), transcript variant 1, mRNA. (from RefSeq NM_025244)
Z2976	-0.8225	0	0	NM_001134420	uc009wdc.3	CDC7	Homo sapiens cell division cycle 7 (CDC7), transcript variant 3, mRNA. (from RefSeq NM_001134420)
Z3815	-0.8222	0	-0.8263	NM_002446	uc002ona.3	MAP3K10	Homo sapiens mitogen-activated protein kinase kinase kinase 10 (MAP3K10), mRNA. (from RefSeq NM_002446)
Z1716	-0.821	0	0	NM_001145028	uc010xnk.2	PALM3	Homo sapiens paralemmin 3 (PALM3), mRNA. (from RefSeq NM_001145028)
Z8	-0.82	0	-0.8925	NM_005454	uc003zlj.4	CER1	Homo sapiens cerberus 1, DAN family BMP antagonist (CER1), mRNA. (from RefSeq NM_005454)
Z4291	0.8209	0.8304	0	NM_000885	uc002unu.4	ITGA4	Homo sapiens integrin, alpha 4 (antigen CD49D, alpha 4 subunit of VLA-4 receptor) (ITGA4), mRNA. (from RefSeq NM_000885)
Z2096	0.8222	0	0	NR_030330	uc033bvm.1	MIR548A3	Homo sapiens microRNA 548a-3 (MIR548A3), microRNA. (from RefSeq NR_030330)
Z2136	0.8229	0	0	NM_031501	uc003lhj.2	PCDHA5	Homo sapiens protocadherin alpha 5 (PCDHA5), transcript variant 2, mRNA. (from RefSeq NM_031501)
Z1752	0.825	0.8702	0	NM_001145815	uc010uwc.3	AMDHD2	Homo sapiens amidohydrolase domain containing 2 (AMDHD2), transcript variant 2, mRNA. (from RefSeq NM_001145815)
Z4605	0.8255	0.8536	0	NM_006895	uc002tvf.4	HNMT	Homo sapiens histamine N-methyltransferase (HNMT), transcript variant 1, mRNA. (from RefSeq NM_006895)
Z1714	0.826	0.8743	0	NM_001280800	uc003uat.5	GTF2I	Homo sapiens general transcription factor IIi (GTF2I), transcript variant 6, mRNA. (from RefSeq NM_001280800)
Z1369	0.8266	0	0	NM_173477	uc032fra.2	USH1G	Homo sapiens Usher syndrome 1G (autosomal recessive) (USH1G), transcript variant 1, mRNA. (from RefSeq NM_173477)
Z269	0.8276	0	0	NM_001160328	uc010ycd.3	SYT3	Homo sapiens synaptotagmin III (SYT3), transcript variant 2, mRNA. (from RefSeq NM_001160328)
Z4412	0.8285	0	0	NM_001127362	uc001tdo.5	NR2C1	Homo sapiens nuclear receptor subfamily 2, group C, member 1 (NR2C1), transcript variant 3, mRNA. (from RefSeq NM_001127362)
Z683	0.8293	0.8539	0	NR_033829	uc001vlm.2	MIR4500HG	Homo sapiens MIR4500 host gene (MIR4500HG), long non-coding RNA. (from RefSeq NR_033829)
Z2864	0.8302	0.8872	0	NM_001031847	uc001oof.5	CPT1A	Homo sapiens carnitine palmitoyltransferase 1A (liver) (CPT1A), transcript variant 2, mRNA. (from RefSeq NM_001031847)
Z4845	0.831	0	0	NM_001286449	uc010ugl.4	TEX9	Homo sapiens testis expressed 9 (TEX9), transcript variant 2, mRNA. (from RefSeq NM_001286449)
Z3893	0.8323	0.862	0.8493	NM_001270455	uc059wmm.1	WWP2	Homo sapiens WW domain containing E3 ubiquitin protein ligase 2 (WWP2), transcript variant 6, mRNA. (from RefSeq NM_001270455)
Z2436	0.8344	0	0	NM_057090	uc001ckv.4	ARTN	Homo sapiens artemin (ARTN), transcript variant 4, mRNA. (from RefSeq NM_057090)
Z1773	0.8354	0.8285	0	NR_036106	uc022azm.1	MIR3151	Homo sapiens microRNA 3151 (MIR3151), microRNA. (from RefSeq NR_036106)
Z760	0.8371	0	0.8389	NM_001300925	uc060vbq.1	SMIM7	Homo sapiens small integral membrane protein 7 (SMIM7), transcript variant 1, mRNA. (from RefSeq NM_001300925)
Z4632	0.8376	0	0	NM_001301056	uc001hjy.4	VASH2	Homo sapiens vasohibin 2 (VASH2), transcript variant 4, mRNA. (from RefSeq NM_001301056)
Z3513	0.8376	0.8368	0.8904	NM_001136557	uc004bze.3	GPR107	Homo sapiens G protein-coupled receptor 107 (GPR107), transcript variant 1, mRNA. (from RefSeq NM_001136557)
Z458	0.838	0	0	NM_001142568	uc010hpr.5	BBX	Homo sapiens bobby sox homolog (Drosophila) (BBX), transcript variant 1, mRNA. (from RefSeq NM_001142568)
Z2305	0.8398	0	0	NM_005243	uc003aet.4	EWSR1	Homo sapiens EWS RNA-binding protein 1 (EWSR1), transcript variant 2, mRNA. (from RefSeq NM_005243)
Z1701	0.8409	0.8334	0	NR_110794	uc057ply.1	RP11-152L7.2	Homo sapiens uncharacterized LOC101929631 (LOC101929631), long non-coding RNA. (from RefSeq NR_110794)
Z2958	0.841	0.8347	0	NM_001135773	uc010gie.5	SPATA2	Homo sapiens spermatogenesis associated 2 (SPATA2), transcript variant 2, mRNA. (from RefSeq NM_001135773)
Z613	0.8413	0	0	NM_001029884	uc003qny.1	PLEKHG1	Homo sapiens pleckstrin homology domain containing, family G (with RhoGef domain) member 1 (PLEKHG1), mRNA. (from RefSeq NM_001029884)
Z4470	0.8422	0	0	NM_030824	uc002mtr.2	ZNF442	Homo sapiens zinc finger protein 442 (ZNF442), mRNA. (from RefSeq NM_030824)
Z1896	0.8423	0.8374	0	NM_000805	uc002hxl.3	GAST	Homo sapiens gastrin (GAST), mRNA. (from RefSeq NM_000805)
Z2366	0.8429	0	0	NM_001166287	uc021svu.1	RGMA	Homo sapiens repulsive guidance molecule family member a (RGMA), transcript variant 3, mRNA. (from RefSeq NM_001166287)
Z2024	0.8432	0.8412	0.8552	NM_001001715	uc001vni.5	FARP1	Homo sapiens FERM, RhoGEF (ARHGEF) and pleckstrin domain protein 1 (chondrocyte-derived) (FARP1), transcript variant 2, mRNA. (from RefSeq NM_001001715)
Z4326	0.8473	0	0.8699	NR_030373	uc021uyt.2	MIR643	Homo sapiens microRNA 643 (MIR643), microRNA. (from RefSeq NR_030373)
Z1812	0.8477	0.8421	0	NM_017791	uc001xrs.3	FLVCR2	Homo sapiens feline leukemia virus subgroup C cellular receptor family, member 2 (FLVCR2), transcript variant 1, mRNA. (from RefSeq NM_017791)
Z2382	0.8483	0	0	NM_000064	uc002mfm.4	C3	Homo sapiens complement component 3 (C3), mRNA. (from RefSeq NM_000064)
Z1322	0.8487	0.8551	0	NM_001282599	uc032nsw.2	CTNNA2	Homo sapiens catenin (cadherin-associated protein), alpha 2 (CTNNA2), transcript variant 5, mRNA. (from RefSeq NM_001282599)
Z1646	0.8489	0.8472	0	NM_001258357	uc031rnp.2	HPCAL1	Homo sapiens hippocalcin-like 1 (HPCAL1), transcript variant 3, mRNA. (from RefSeq NM_001258357)
Z1647	0.8489	0.8472	0	NM_000909	uc003iqm.3	NPY1R	Homo sapiens neuropeptide Y receptor Y1 (NPY1R), mRNA. (from RefSeq NM_000909)
Z3825	0.8511	0	0	NM_152496	uc001cbz.3	MANEAL	Homo sapiens mannosidase, endo-alpha-like (MANEAL), transcript variant 2, mRNA. (from RefSeq NM_152496)
Z2021	0.8533	0	0.9064	NM_001256574	uc031skd.1	ENC1	Homo sapiens ectodermal-neural cortex 1 (with BTB domain) (ENC1), transcript variant 2, mRNA. (from RefSeq NM_001256574)
Z2707	0.8562	0.8613	0.9216	NM_133484	uc061oyf.1	TANK	Homo sapiens TRAF family member-associated NFKB activator (TANK), transcript variant 2, mRNA. (from RefSeq NM_133484)
Z2047	0.8565	0	0.868	NM_021197	uc002fhw.5	WFDC1	Homo sapiens WAP four-disulfide core domain 1 (WFDC1), transcript variant 1, mRNA. (from RefSeq NM_021197)
Z2319	0.8567	0	0	NM_001122834	uc009xcx.3	HHAT	Homo sapiens hedgehog acyltransferase (HHAT), transcript variant 2, mRNA. (from RefSeq NM_001122834)
Z1115	0.8576	0	0	NM_001144058	uc001qgq.4	NTM	Homo sapiens neurotrimin (NTM), transcript variant 3, mRNA. (from RefSeq NM_001144058)
Z3017	0.8586	0.9012	0	NM_005603	uc002lgw.5	ATP8B1	Homo sapiens ATPase, aminophospholipid transporter, class I, type 8B, member 1 (ATP8B1), mRNA. (from RefSeq NM_005603)
Z992	0.8591	0	0	NM_000120	uc001hpl.4	EPHX1	Homo sapiens epoxide hydrolase 1, microsomal (xenobiotic) (EPHX1), transcript variant 1, mRNA. (from RefSeq NM_000120)
Z3300	0.8593	0.8862	0.8911	NM_001146055	uc003hsr.4	SNCA	Homo sapiens synuclein, alpha (non A4 component of amyloid precursor) (SNCA), transcript variant 3, mRNA. (from RefSeq NM_001146055)
Z878	0.8603	0.8439	0.8627	NM_001204091	uc003ojn.3	RPS10	Homo sapiens ribosomal protein S10 (RPS10), transcript variant 3, mRNA. (from RefSeq NM_001204091)
Z1687	0.8606	0	0	NM_001099856	uc033fbu.1	IKBKG	Homo sapiens inhibitor of kappa light polypeptide gene enhancer in B-cells, kinase gamma (IKBKG), transcript variant 2, mRNA. (from RefSeq NM_001099856)
Z4252	0.8612	0.8952	0	NM_032854	uc002hel.2	CORO6	Homo sapiens coronin 6 (CORO6), mRNA. (from RefSeq NM_032854)
Z2883	0.8614	0	0	NM_018338	uc003eae.3	CFAP44	Homo sapiens cilia and flagella associated protein 44 (CFAP44), transcript variant 2, mRNA. (from RefSeq NM_018338)
Z948	0.8627	0.8696	0.8572	NM_001008505	uc003qpo.3	OPRM1	Homo sapiens opioid receptor, mu 1 (OPRM1), transcript variant MOR-1X, mRNA. (from RefSeq NM_001008505)
Z1302	0.8631	0.8525	0.8429	NM_001137673	uc002mpm.3	ILF3	Homo sapiens interleukin enhancer binding factor 3, 90kDa (ILF3), transcript variant 5, mRNA. (from RefSeq NM_001137673)
Z1993	0.8641	0	0	NM_001162498	uc058wym.1	LPAR6	Homo sapiens lysophosphatidic acid receptor 6 (LPAR6), transcript variant 3, mRNA. (from RefSeq NM_001162498)
Z2504	0.8644	0.833	0.8569	NM_032995	uc032ocg.2	ARHGEF4	Homo sapiens Rho guanine nucleotide exchange factor (GEF) 4 (ARHGEF4), transcript variant 2, mRNA. (from RefSeq NM_032995)
Z1173	0.8654	0.8585	0.842	NM_002582	uc010uzd.3	PARN	Homo sapiens poly(A)-specific ribonuclease (PARN), transcript variant 1, mRNA. (from RefSeq NM_002582)
Z569	0.8656	0	0.8879	NM_018293	uc003dqv.4	ZNF654	Homo sapiens zinc finger protein 654 (ZNF654), mRNA. (from RefSeq NM_018293)
Z2480	0.8665	0.8592	0	NM_030953	uc003lrj.4	TIGD6	Homo sapiens tigger transposable element derived 6 (TIGD6), transcript variant 1, mRNA. (from RefSeq NM_030953)
Z2261	0.8667	0	0.8693	NR_126007	uc059wnt.1	RP11-296I10.3	Homo sapiens uncharacterized LOC400541 (LOC400541), long non-coding RNA. (from RefSeq NR_126007)
Z897	0.8668	0.8328	0.9404	NR_110596	uc001swn.3	LGR5	Homo sapiens leucine-rich repeat containing G protein-coupled receptor 5 (LGR5), transcript variant 4, non-coding RNA. (from RefSeq NR_110596)
Z666	0.8679	0	0.8903	NR_105006	uc033bqc.2	LINC01111	Homo sapiens long intergenic non-protein coding RNA 1111 (LINC01111), long non-coding RNA. (from RefSeq NR_105006)
Z4359	0.868	0.8497	0.8811	NM_001007246	uc002yxm.4	BRWD1	Homo sapiens bromodomain and WD repeat domain containing 1 (BRWD1), transcript variant 3, mRNA. (from RefSeq NM_001007246)
Z980	0.8704	0	0	NM_021957	uc001rfb.3	GYS2	Homo sapiens glycogen synthase 2 (liver) (GYS2), mRNA. (from RefSeq NM_021957)
Z4477	0.8706	0.8417	0.8966	NM_030926	uc002vqz.5	ITM2C	Homo sapiens integral membrane protein 2C (ITM2C), transcript variant 1, mRNA. (from RefSeq NM_030926)
Z111	0.871	0.8912	0.8322	NR_026800	uc032bne.1	KIAA0125	Homo sapiens KIAA0125 (KIAA0125), long non-coding RNA. (from RefSeq NR_026800)
Z3226	0.8714	0	0.9116	NM_014730	uc001tyy.2	MLEC	Homo sapiens malectin (MLEC), transcript variant 1, mRNA. (from RefSeq NM_014730)
Z2517	0.8721	0.8473	0.9044	NM_001282679	uc010mwx.5	GAPVD1	Homo sapiens GTPase activating protein and VPS9 domains 1 (GAPVD1), transcript variant 1, mRNA. (from RefSeq NM_001282679)
Z4081	0.8721	0.9103	0	NR_027098	uc061hyt.1	LINC00486	Homo sapiens long intergenic non-protein coding RNA 486 (LINC00486), transcript variant 1, long non-coding RNA. (from RefSeq NR_027098)
Z3309	0.8722	0.8588	0.8468	NM_005960	uc033aad.2	MUC3A	Homo sapiens mucin 3A, cell surface associated (MUC3A), mRNA. (from RefSeq NM_005960)
Z1925	0.8741	0	0	NM_015660	uc003who.4	GIMAP2	Homo sapiens GTPase, IMAP family member 2 (GIMAP2), mRNA. (from RefSeq NM_015660)
Z3726	0.8745	0.8317	0.8847	NM_001201475	uc021uiu.2	C18orf21	Homo sapiens chromosome 18 open reading frame 21 (C18orf21), transcript variant 3, mRNA. (from RefSeq NM_001201475)
Z3746	0.8754	0	0.8407	NM_021083	uc004ddq.4	XK	Homo sapiens X-linked Kx blood group (XK), mRNA. (from RefSeq NM_021083)
Z233	0.879	0.8874	0.8504	NM_001934	uc002ipw.4	DLX4	Homo sapiens distal-less homeobox 4 (DLX4), transcript variant 2, mRNA. (from RefSeq NM_001934)
Z3099	0.8817	0.943	0.8526	NM_001281441	uc032zso.2	WBSCR16	Homo sapiens Williams-Beuren syndrome chromosome region 16 (WBSCR16), transcript variant 3, mRNA. (from RefSeq NM_001281441)
Z725	0.884	0.873	0.8807	NM_138367	uc003zdv.5	ZNF251	Homo sapiens zinc finger protein 251 (ZNF251), mRNA. (from RefSeq NM_138367)
Z2939	0.8842	0.8764	0.9325	NM_005627	uc003qen.5	SGK1	Homo sapiens serum/glucocorticoid regulated kinase 1 (SGK1), transcript variant 1, mRNA. (from RefSeq NM_005627)
Z808	0.8848	0.8721	0.8862	NM_001142275	uc001yve.4	NIPA1	Homo sapiens non imprinted in Prader-Willi/Angelman syndrome 1 (NIPA1), transcript variant 2, mRNA. (from RefSeq NM_001142275)
Z3771	0.885	0.8385	0.8701	NM_002022	uc001gho.4	FMO4	Homo sapiens flavin containing monooxygenase 4 (FMO4), mRNA. (from RefSeq NM_002022)
Z3286	0.8859	0.8789	0.8723	NM_001278553	uc002jlu.2	GRIN2C	Homo sapiens glutamate receptor, ionotropic, N-methyl D-aspartate 2C (GRIN2C), transcript variant 2, mRNA. (from RefSeq NM_001278553)
Z5002	0.8878	0	0.9037	NM_000944	uc011cen.2	PPP3CA	Homo sapiens protein phosphatase 3, catalytic subunit, alpha isozyme (PPP3CA), transcript variant 1, mRNA. (from RefSeq NM_000944)
Z4068	0.8895	0.8882	0.8445	NM_001170704	uc004eww.4	MBNL3	Homo sapiens muscleblind-like splicing regulator 3 (MBNL3), transcript variant 6, mRNA. (from RefSeq NM_001170704)
Z3390	0.8929	0.9404	0.8448	NM_001008539	uc064kns.1	SLC7A2	Homo sapiens solute carrier family 7 (cationic amino acid transporter, y+ system), member 2 (SLC7A2), transcript variant 2, mRNA. (from RefSeq NM_001008539)
Z2265	0.8967	0.8989	0.9221	NM_144575	uc061hvv.1	CAPN13	Homo sapiens calpain 13 (CAPN13), mRNA. (from RefSeq NM_144575)
Z4718	0.9003	0.9513	0.8473	NM_017912	uc011cdi.3	HERC6	Homo sapiens HECT and RLD domain containing E3 ubiquitin protein ligase family member 6 (HERC6), transcript variant 1, mRNA. (from RefSeq NM_017912)
Z3832	0.9008	0.8863	0.8623	NM_001204193	uc003kqb.3	SRP19	Homo sapiens signal recognition particle 19kDa (SRP19), transcript variant 2, mRNA. (from RefSeq NM_001204193)
Z2508	0.9029	0.8693	0.9138	NM_001816	uc002oud.3	CEACAM8	Homo sapiens carcinoembryonic antigen-related cell adhesion molecule 8 (CEACAM8), mRNA. (from RefSeq NM_001816)
Z2963	0.9067	0.8548	0	NM_004616	uc001swj.2	TSPAN8	Homo sapiens tetraspanin 8 (TSPAN8), mRNA. (from RefSeq NM_004616)
Z2043	0.9073	0.8505	0.8739	NM_000960	uc002pex.4	PTGIR	Homo sapiens prostaglandin I2 (prostacyclin) receptor (IP) (PTGIR), mRNA. (from RefSeq NM_000960)
Z3812	0.9115	0.8453	0.9317	NR_103535	uc031uek.1	NEXN-AS1	Homo sapiens NEXN antisense RNA 1 (NEXN-AS1), long non-coding RNA. (from RefSeq NR_103535)
Z4859	0.9118	0	0.888	NM_201612	uc001tfv.5	IKBIP	Homo sapiens IKBKB interacting protein (IKBIP), transcript variant 2, mRNA. (from RefSeq NM_201612)
Z3291	0.9129	0.8954	0.8933	NM_001289978	uc021uty.2	DPF1	Homo sapiens D4, zinc and double PHD fingers family 1 (DPF1), transcript variant 4, mRNA. (from RefSeq NM_001289978)
Z1818	0.9137	0.8595	0.8977	NM_198682	uc003ijj.4	GYPE	Homo sapiens glycophorin E (MNS blood group) (GYPE), transcript variant 2, mRNA. (from RefSeq NM_198682)
Z3355	0.9139	0.8325	0.8962	NM_001560	uc004eqs.4	IL13RA1	Homo sapiens interleukin 13 receptor, alpha 1 (IL13RA1), mRNA. (from RefSeq NM_001560)
Z1673	0.9221	0.947	0.8708	NM_001025159	uc003lsc.4	CD74	Homo sapiens CD74 molecule, major histocompatibility complex, class II invariant chain (CD74), transcript variant 1, mRNA. (from RefSeq NM_001025159)
Z134	0.9234	0.8674	0.931	NM_020427	uc003ywy.3	SLURP1	Homo sapiens secreted LY6/PLAUR domain containing 1 (SLURP1), mRNA. (from RefSeq NM_020427)
Z3493	0.9249	0.8557	0.9088	NM_033668	uc001iwr.5	ITGB1	Homo sapiens integrin, beta 1 (fibronectin receptor, beta polypeptide, antigen CD29 includes MDF2, MSK12) (ITGB1), transcript variant 1D, mRNA. (from RefSeq NM_033668)
Z4319	0.9294	0.9268	0.8881	NM_001127207	uc002vgd.5	SMARCAL1	Homo sapiens SWI/SNF related, matrix associated, actin dependent regulator of chromatin, subfamily a-like 1 (SMARCAL1), transcript variant 2, mRNA. (from RefSeq NM_001127207)
Z247	0.9322	0.8612	0.8756	NR_039886	uc021tui.1	MIR4733	Homo sapiens microRNA 4733 (MIR4733), microRNA. (from RefSeq NR_039886)
Z3237	0.9329	0.8923	0.878	NM_016603	uc003lbz.3	FAM13B	Homo sapiens family with sequence similarity 13, member B (FAM13B), transcript variant 1, mRNA. (from RefSeq NM_016603)
Z364	0.9364	0.8968	0.8648	NM_032214	uc002xfv.4	SLA2	Homo sapiens Src-like-adaptor 2 (SLA2), transcript variant 1, mRNA. (from RefSeq NM_032214)
Z3874	0.9383	0.9544	0.8843	NM_172069	uc010yny.3	PLEKHH2	Homo sapiens pleckstrin homology domain containing, family H (with MyTH4 domain) member 2 (PLEKHH2), mRNA. (from RefSeq NM_172069)
Z2823	0.9426	0.9357	0.9285	NM_032918	uc001rct.4	RERG	Homo sapiens RAS-like, estrogen-regulated, growth inhibitor (RERG), transcript variant 1, mRNA. (from RefSeq NM_032918)
Z137	0.9429	0.887	0.8919	NM_001198593	uc021vhf.1	STON1-GTF2A1L	Homo sapiens STON1-GTF2A1L readthrough (STON1-GTF2A1L), transcript variant 2, mRNA. (from RefSeq NM_001198593)
Z1973	0.9442	0.8965	0.9623	NM_012208	uc003lgx.5	HARS2	Homo sapiens histidyl-tRNA synthetase 2, mitochondrial (HARS2), transcript variant 1, mRNA. (from RefSeq NM_012208)
Z3394	0.9569	0.9036	0.9085	NM_178043	uc062zmr.1	LARP1B	Homo sapiens La ribonucleoprotein domain family, member 1B (LARP1B), transcript variant 2, mRNA. (from RefSeq NM_178043)
Z2452	0.9671	0.9457	0.9635	NM_001287061	uc011kee.4	RABGEF1	Homo sapiens RAB guanine nucleotide exchange factor (GEF) 1 (RABGEF1), transcript variant 2, mRNA. (from RefSeq NM_001287061)
Z4413	0.9774	0.9709	0.9268	NM_001130849	uc010fxq.4	CAB39	Homo sapiens calcium binding protein 39 (CAB39), transcript variant 2, mRNA. (from RefSeq NM_001130849)
Z2850	0	-0.8843	0	NM_012360	uc010uwu.3	OR1F1	Homo sapiens olfactory receptor, family 1, subfamily F, member 1 (OR1F1), mRNA. (from RefSeq NM_012360)
Z1902	0	-0.8824	-0.8515	NM_001252127	uc021skz.2	AP4E1	Homo sapiens adaptor-related protein complex 4, epsilon 1 subunit (AP4E1), transcript variant 2, mRNA. (from RefSeq NM_001252127)
Z2346	0	-0.88	0	NM_024933	uc002shk.5	ANKRD53	Homo sapiens ankyrin repeat domain 53 (ANKRD53), transcript variant 2, mRNA. (from RefSeq NM_024933)
Z2570	0	-0.866	-0.827	NR_039911	uc021wca.1	MIR4755	Homo sapiens microRNA 4755 (MIR4755), microRNA. (from RefSeq NR_039911)
Z2569	0	-0.866	-0.827	NR_125841	uc063pck.1	LINC01564	Homo sapiens long intergenic non-protein coding RNA 1564 (LINC01564), long non-coding RNA. (from RefSeq NR_125841)
Z2484	0	-0.8631	-0.8231	NR_024153	uc003vqo.1	LINC-PINT	Homo sapiens long intergenic non-protein coding RNA, p53 induced transcript (LINC-PINT), transcript variant 2, long non-coding RNA. (from RefSeq NR_024153)
Z2586	0	-0.8627	0	NM_005317	uc002low.3	GZMM	Homo sapiens granzyme M (lymphocyte met-ase 1) (GZMM), transcript variant 1, mRNA. (from RefSeq NM_005317)
Z2587	0	-0.8627	0	NM_001080456	uc010ygh.2	ZSCAN5B	Homo sapiens zinc finger and SCAN domain containing 5B (ZSCAN5B), mRNA. (from RefSeq NM_001080456)
Z3968	0	-0.8618	-0.8259	NM_001013742	uc033edr.2	DGKK	Homo sapiens diacylglycerol kinase, kappa (DGKK), mRNA. (from RefSeq NM_001013742)
Z2814	0	-0.8601	0	NM_001291311	uc002onn.3	PLD3	Homo sapiens phospholipase D family, member 3 (PLD3), transcript variant 3, mRNA. (from RefSeq NM_001291311)
Z4258	0	-0.8591	0	NM_001002912	uc001dgg.3	ERICH3	Homo sapiens glutamate-rich 3 (ERICH3), mRNA. (from RefSeq NM_001002912)
Z2473	0	-0.8567	0	NM_001288731	uc033czy.2	DAPK1	Homo sapiens death-associated protein kinase 1 (DAPK1), transcript variant 4, mRNA. (from RefSeq NM_001288731)
Z4384	0	-0.8566	0	NM_152606	uc002ogq.5	ZNF540	Homo sapiens zinc finger protein 540 (ZNF540), transcript variant 2, mRNA. (from RefSeq NM_152606)
Z2492	0	-0.8532	0	NM_001301013	uc011ecs.3	EYA4	Homo sapiens EYA transcriptional coactivator and phosphatase 4 (EYA4), transcript variant 6, mRNA. (from RefSeq NM_001301013)
Z2419	0	-0.8466	0	NM_000828	uc033etm.2	GRIA3	Homo sapiens glutamate receptor, ionotropic, AMPA 3 (GRIA3), transcript variant 2, mRNA. (from RefSeq NM_000828)
Z1168	0	-0.8442	0	NM_024410	uc003ykt.3	ODF1	Homo sapiens outer dense fiber of sperm tails 1 (ODF1), mRNA. (from RefSeq NM_024410)
Z2321	0	-0.8441	0	NM_173479	uc002nui.4	WDR88	Homo sapiens WD repeat domain 88 (WDR88), mRNA. (from RefSeq NM_173479)
Z4312	0	-0.8429	0	NM_030621	uc059ett.1	DICER1	Homo sapiens dicer 1, ribonuclease type III (DICER1), transcript variant 2, mRNA. (from RefSeq NM_030621)
Z3406	0	-0.8378	0	NM_006760	uc001puh.4	UPK2	Homo sapiens uroplakin 2 (UPK2), mRNA. (from RefSeq NM_006760)
Z3058	0	-0.8377	0	NM_002009	uc001zxn.3	FGF7	Homo sapiens fibroblast growth factor 7 (FGF7), mRNA. (from RefSeq NM_002009)
Z2782	0	-0.8377	-0.8373	NM_182492	uc062cmk.1	LRP5L	Homo sapiens low density lipoprotein receptor-related protein 5-like (LRP5L), transcript variant 1, mRNA. (from RefSeq NM_182492)
Z3948	0	-0.8372	-0.8961	NM_001267868	uc060scm.1	HSD11B1L	Homo sapiens hydroxysteroid (11-beta) dehydrogenase 1-like (HSD11B1L), transcript variant g, mRNA. (from RefSeq NM_001267868)
Z1079	0	-0.8323	0	NM_005220	uc002ipy.3	DLX3	Homo sapiens distal-less homeobox 3 (DLX3), mRNA. (from RefSeq NM_005220)
Z1080	0	-0.8323	0	NR_046200	uc031qxk.2	RP11-46C24.3	Homo sapiens uncharacterized LOC400558 (LOC400558), long non-coding RNA. (from RefSeq NR_046200)
Z2965	0	-0.8295	0	NM_005714	uc001oeu.3	KCNK7	Homo sapiens potassium channel, two pore domain subfamily K, member 7 (KCNK7), transcript variant C, mRNA. (from RefSeq NM_005714)
Z258	0	-0.8292	0	NM_001114620	uc010jlg.4	MGAT1	Homo sapiens mannosyl (alpha-1,3-)-glycoprotein beta-1,2-N-acetylglucosaminyltransferase (MGAT1), transcript variant 5, mRNA. (from RefSeq NM_001114620)
Z1034	0	-0.829	0	NM_005297	uc003ayz.4	MCHR1	Homo sapiens melanin-concentrating hormone receptor 1 (MCHR1), mRNA. (from RefSeq NM_005297)
Z1622	0	-0.8287	0	NM_014037	uc002pmz.4	SLC6A16	Homo sapiens solute carrier family 6, member 16 (SLC6A16), mRNA. (from RefSeq NM_014037)
Z4369	0	-0.8287	0	NM_001134664	uc010orx.3	SAMD13	Homo sapiens sterile alpha motif domain containing 13 (SAMD13), transcript variant 3, mRNA. (from RefSeq NM_001134664)
Z1259	0	-0.8278	0	NM_001611	uc002msg.5	ACP5	Homo sapiens acid phosphatase 5, tartrate resistant (ACP5), transcript variant 4, mRNA. (from RefSeq NM_001611)
Z1160	0	-0.8222	0	NM_170707	uc001fni.4	LMNA	Homo sapiens lamin A/C (LMNA), transcript variant 1, mRNA. (from RefSeq NM_170707)
Z1145	0	-0.822	0	NM_001135218	uc001bqx.5	TAF12	Homo sapiens TAF12 RNA polymerase II, TATA box binding protein (TBP)-associated factor, 20kDa (TAF12), transcript variant 1, mRNA. (from RefSeq NM_001135218)
Z1277	0	-0.8201	0	NM_001099684	uc004drl.4	FAM156B	Homo sapiens family with sequence similarity 156, member B (FAM156B), mRNA. (from RefSeq NM_001099684)
Z3083	0	0.8239	0	NM_003898	uc003qqx.3	SYNJ2	Homo sapiens synaptojanin 2 (SYNJ2), transcript variant 1, mRNA. (from RefSeq NM_003898)
Z795	0	0.8296	0.8315	NM_005684	uc001gka.2	GPR52	Homo sapiens G protein-coupled receptor 52 (GPR52), mRNA. (from RefSeq NM_005684)
Z3335	0	0.8306	0	NR_049816	uc031qxb.1	MIR5093	Homo sapiens microRNA 5093 (MIR5093), microRNA. (from RefSeq NR_049816)
Z4206	0	0.8312	0	NM_001100878	uc010mff.4	MROH6	Homo sapiens maestro heat-like repeat family member 6 (MROH6), mRNA. (from RefSeq NM_001100878)
Z556	0	0.8343	0	NM_020469	uc033djz.1	ABO	Homo sapiens ABO blood group (transferase A, alpha 1-3-N-acetylgalactosaminyltransferase; transferase B, alpha 1-3-galactosyltransferase) (ABO), mRNA. (from RefSeq NM_020469)
Z3899	0	0.835	0	NM_001282650	uc011mml.2	SLC35A2	Homo sapiens solute carrier family 35 (UDP-galactose transporter), member A2 (SLC35A2), transcript variant 7, mRNA. (from RefSeq NM_001282650)
Z504	0	0.8363	0	NR_039762	uc033drr.1	MIR548AM	Homo sapiens microRNA 548am (MIR548AM), microRNA. (from RefSeq NR_039762)
Z4342	0	0.8426	0	NM_001174070	uc021xkl.1	FAM53A	Homo sapiens family with sequence similarity 53, member A (FAM53A), transcript variant 2, mRNA. (from RefSeq NM_001174070)
Z1558	0	0.8439	0	NR_036087	uc021xaj.1	MIR3136	Homo sapiens microRNA 3136 (MIR3136), microRNA. (from RefSeq NR_036087)
Z344	0	0.8448	0.8742	NM_001935	uc002ubz.4	DPP4	Homo sapiens dipeptidyl-peptidase 4 (DPP4), mRNA. (from RefSeq NM_001935)
Z1933	0	0.8476	0	NR_037424	uc010mqv.4	MIR3651	Homo sapiens microRNA 3651 (MIR3651), microRNA. (from RefSeq NR_037424)
Z1807	0	0.8491	0	NM_020733	uc003ehs.4	HEG1	Homo sapiens heart development protein with EGF-like domains 1 (HEG1), mRNA. (from RefSeq NM_020733)
Z307	0	0.8499	0.8731	NM_001136495	uc009xfh.3	C1orf198	Homo sapiens chromosome 1 open reading frame 198 (C1orf198), transcript variant 3, mRNA. (from RefSeq NM_001136495)
Z1674	0	0.8508	0	NM_054023	uc003lot.3	SCGB3A2	Homo sapiens secretoglobin, family 3A, member 2 (SCGB3A2), mRNA. (from RefSeq NM_054023)
Z414	0	0.8546	0	NM_130469	uc010tvc.3	JDP2	Homo sapiens Jun dimerization protein 2 (JDP2), transcript variant 1, mRNA. (from RefSeq NM_130469)
Z4708	0	0.8574	0.8319	NR_106774	uc032aso.1	MIR6717	Homo sapiens microRNA 6717 (MIR6717), microRNA. (from RefSeq NR_106774)
Z791	0	0.8588	0.8688	NR_046839	uc031tzy.1	AGBL4-IT1	Homo sapiens AGBL4 intronic transcript 1 (AGBL4-IT1), long non-coding RNA. (from RefSeq NR_046839)
Z790	0	0.8588	0.8688	NM_001164106	uc003bjl.4	MOV10L1	Homo sapiens Mov10 RISC complex RNA helicase like 1 (MOV10L1), transcript variant 4, mRNA. (from RefSeq NM_001164106)
Z1782	0	0.8612	0	NM_001272034	uc010xjr.4	STXBP2	Homo sapiens syntaxin binding protein 2 (STXBP2), transcript variant 3, mRNA. (from RefSeq NM_001272034)
Z1781	0	0.8612	0	NR_047036	uc031qld.3	LINC00457	Homo sapiens long intergenic non-protein coding RNA 457 (LINC00457), long non-coding RNA. (from RefSeq NR_047036)
Z895	0	0.8612	0.8668	NM_001130099	uc010cdf.4	KIFC3	Homo sapiens kinesin family member C3 (KIFC3), transcript variant 3, mRNA. (from RefSeq NM_001130099)
Z4280	0	0.8615	0.8839	NM_001945	uc003lfi.4	HBEGF	Homo sapiens heparin-binding EGF-like growth factor (HBEGF), mRNA. (from RefSeq NM_001945)
Z1670	0	0.8634	0	NR_106819	uc031znl.1	MIR6761	Homo sapiens microRNA 6761 (MIR6761), microRNA. (from RefSeq NR_106819)
Z2338	0	0.8672	0	NM_001270453	uc010vlm.2	WWP2	Homo sapiens WW domain containing E3 ubiquitin protein ligase 2 (WWP2), transcript variant 4, mRNA. (from RefSeq NM_001270453)
Z2334	0	0.8672	0	NM_004931	uc002srz.4	CD8B	Homo sapiens CD8b molecule (CD8B), transcript variant 5, mRNA. (from RefSeq NM_004931)
Z2336	0	0.8672	0	NM_006167	uc011kzx.3	NKX3-1	Homo sapiens NK3 homeobox 1 (NKX3-1), transcript variant 1, mRNA. (from RefSeq NM_006167)
Z2337	0	0.8672	0	NM_032160	uc002lke.2	DSEL	Homo sapiens dermatan sulfate epimerase-like (DSEL), mRNA. (from RefSeq NM_032160)
Z2335	0	0.8672	0	NM_144670	uc001quz.6	A2ML1	Homo sapiens alpha-2-macroglobulin-like 1 (A2ML1), transcript variant 1, mRNA. (from RefSeq NM_144670)
Z2340	0	0.8672	0	NR_030328	uc022arw.2	MIR598	Homo sapiens microRNA 598 (MIR598), microRNA. (from RefSeq NR_030328)
Z2339	0	0.8672	0	NM_001197296	uc004asf.5	ECM2	Homo sapiens extracellular matrix protein 2, female organ and adipocyte specific (ECM2), transcript variant 3, mRNA. (from RefSeq NM_001197296)
Z417	0	0.8676	0	NM_052863	uc003mly.4	SCGB3A1	Homo sapiens secretoglobin, family 3A, member 1 (SCGB3A1), mRNA. (from RefSeq NM_052863)
Z2216	0	0.8685	0.8201	NM_001012970	uc001iah.5	C1orf100	Homo sapiens chromosome 1 open reading frame 100 (C1orf100), transcript variant 1, mRNA. (from RefSeq NM_001012970)
Z2218	0	0.8685	0.8201	NR_037496	uc021wny.1	MIR3928	Homo sapiens microRNA 3928 (MIR3928), microRNA. (from RefSeq NR_037496)
Z2217	0	0.8685	0.8201	NR_039967	uc021yak.1	MIR4803	Homo sapiens microRNA 4803 (MIR4803), microRNA. (from RefSeq NR_039967)
Z2215	0	0.8685	0.8201	NM_001130677	uc010wdq.3	C17orf96	Homo sapiens chromosome 17 open reading frame 96 (C17orf96), mRNA. (from RefSeq NM_001130677)
Z2611	0	0.869	0.823	NM_013308	uc003eyq.5	GPR171	Homo sapiens G protein-coupled receptor 171 (GPR171), mRNA. (from RefSeq NM_013308)
Z2612	0	0.869	0.823	NM_178034	uc001zox.3	PLA2G4D	Homo sapiens phospholipase A2, group IVD (cytosolic) (PLA2G4D), mRNA. (from RefSeq NM_178034)
Z2610	0	0.869	0.823	NM_178276	uc003kgk.4	SERINC5	Homo sapiens serine incorporator 5 (SERINC5), transcript variant 2, mRNA. (from RefSeq NM_178276)
Z2613	0	0.869	0.823	NR_110877	uc060jjh.1	SOX9-AS1	Homo sapiens uncharacterized LOC102723517 (LOC102723517), long non-coding RNA. (from RefSeq NR_110877)
Z2468	0	0.8699	0.8284	NM_001927	uc002vll.3	DES	Homo sapiens desmin (DES), mRNA. (from RefSeq NM_001927)
Z2467	0	0.8699	0.8284	NM_002514	uc003yoq.3	NOV	Homo sapiens nephroblastoma overexpressed (NOV), mRNA. (from RefSeq NM_002514)
Z1751	0	0.8699	0.8495	NM_005650	uc003bcj.3	TCF20	Homo sapiens transcription factor 20 (AR1) (TCF20), transcript variant 1, mRNA. (from RefSeq NM_005650)
Z2464	0	0.8699	0.8284	NM_001024603	uc003vlj.2	RP5-907C10.4	Homo sapiens chromosome 7 open reading frame 77 (C7orf77), mRNA. (from RefSeq NM_001024603)
Z2470	0	0.8699	0.8284	NM_139046	uc010qgk.4	MAPK8	Homo sapiens mitogen-activated protein kinase 8 (MAPK8), transcript variant JNK1-b1, mRNA. (from RefSeq NM_139046)
Z2469	0	0.8699	0.8284	NM_199482	uc002uum.4	MOB4	Homo sapiens MOB family member 4, phocein (MOB4), transcript variant 2, mRNA. (from RefSeq NM_199482)
Z2466	0	0.8699	0.8284	NR_108027	uc032vtt.2	LINC01484	Homo sapiens long intergenic non-protein coding RNA 1484 (LINC01484), long non-coding RNA. (from RefSeq NR_108027)
Z2465	0	0.8699	0.8284	NM_001130845	uc003frp.4	BCL6	Homo sapiens B-cell CLL/lymphoma 6 (BCL6), transcript variant 2, mRNA. (from RefSeq NM_001130845)
Z1750	0	0.8699	0.8495	NM_001184832	uc010bem.4	SLC12A1	Homo sapiens solute carrier family 12 (sodium/potassium/chloride transporter), member 1 (SLC12A1), transcript variant 2, mRNA. (from RefSeq NM_001184832)
Z287	0	0.8703	0	NM_032546	uc002rjn.4	TRIM54	Homo sapiens tripartite motif containing 54 (TRIM54), transcript variant 1, mRNA. (from RefSeq NM_032546)
Z1554	0	0.8706	0.8432	NM_005330	uc001mal.2	HBE1	Homo sapiens hemoglobin, epsilon 1 (HBE1), mRNA. (from RefSeq NM_005330)
Z1553	0	0.8706	0.8432	NR_033853	uc001nng.2	RP11-142C4.6	Homo sapiens uncharacterized LOC283194 (LOC283194), long non-coding RNA. (from RefSeq NR_033853)
Z2981	0	0.8914	0.8378	NM_024863	uc004ekl.4	TCEAL4	Homo sapiens transcription elongation factor A (SII)-like 4 (TCEAL4), transcript variant 1, mRNA. (from RefSeq NM_024863)
Z418	0	0.892	0.8312	NM_001448	uc004exc.2	GPC4	Homo sapiens glypican 4 (GPC4), mRNA. (from RefSeq NM_001448)
Z72	0	0	-0.8966	NM_004473	uc004axu.4	FOXE1	Homo sapiens forkhead box E1 (FOXE1), mRNA. (from RefSeq NM_004473)
Z3798	0	0	-0.8795	NM_001264573	uc031rbb.2	KIF18B	Homo sapiens kinesin family member 18B (KIF18B), transcript variant 2, mRNA. (from RefSeq NM_001264573)
Z1618	0	0	-0.8795	NM_183378	uc001rix.2	OVCH1	Homo sapiens ovochymase 1 (OVCH1), mRNA. (from RefSeq NM_183378)
Z863	0	0	-0.8775	NM_182847	uc002vma.4	ASIC4	Homo sapiens acid sensing (proton gated) ion channel family member 4 (ASIC4), mRNA. (from RefSeq NM_182847)
Z1857	0	0	-0.8755	NR_106925	uc032erv.1	MIR6865	Homo sapiens microRNA 6865 (MIR6865), microRNA. (from RefSeq NR_106925)
Z2048	0	0	-0.8744	NR_106862	uc032ifs.1	MIR6804	Homo sapiens microRNA 6804 (MIR6804), microRNA. (from RefSeq NR_106862)
Z308	0	0	-0.8663	NR_110809	uc060hwp.1	RP11-159D12.10	Homo sapiens uncharacterized LOC101927666 (LOC101927666), long non-coding RNA. (from RefSeq NR_110809)
Z296	0	0	-0.8651	NM_001145661	uc003ekm.4	GATA2	Homo sapiens GATA binding protein 2 (GATA2), transcript variant 1, mRNA. (from RefSeq NM_001145661)
Z3326	0	0	-0.8646	NR_123725	uc001fvj.1	RP11-536C5.7	Homo sapiens uncharacterized LOC729867 (LOC729867), long non-coding RNA. (from RefSeq NR_123725)
Z1819	0	0	-0.8628	NM_015349	uc003osp.1	GLTSCR1L	Homo sapiens GLTSCR1-like (GLTSCR1L), mRNA. (from RefSeq NM_015349)
Z3938	0	0	-0.8603	NM_001282431	uc002vvm.6	ARL4C	Homo sapiens ADP-ribosylation factor-like 4C (ARL4C), transcript variant 1, mRNA. (from RefSeq NM_001282431)
Z1614	0	0	-0.8599	NM_000015	uc003wyw.2	NAT2	Homo sapiens N-acetyltransferase 2 (arylamine N-acetyltransferase) (NAT2), mRNA. (from RefSeq NM_000015)
Z4551	0	0	-0.8589	NR_110599	uc061pzh.1	LINC01117	Homo sapiens long intergenic non-protein coding RNA 1117 (LINC01117), long non-coding RNA. (from RefSeq NR_110599)
Z2488	0	0	-0.8542	NR_110997	uc032vkw.2	AC034220.3	Homo sapiens uncharacterized LOC553103 (LOC553103), long non-coding RNA. (from RefSeq NR_110997)
Z2097	0	0	-0.8522	NM_001099784	uc002eab.2	FBXL19	Homo sapiens F-box and leucine-rich repeat protein 19 (FBXL19), transcript variant 1, mRNA. (from RefSeq NM_001099784)
Z603	0	0	-0.8451	NM_152367	uc001egc.1	MAB21L3	Homo sapiens mab-21-like 3 (C. elegans) (MAB21L3), mRNA. (from RefSeq NM_152367)
Z3076	0	0	-0.8441	NM_001286440	uc032dni.2	NME4	Homo sapiens NME/NM23 nucleoside diphosphate kinase 4 (NME4), transcript variant 7, mRNA. (from RefSeq NM_001286440)
Z811	0	0	-0.8423	NR_110542	uc062diq.1	PIK3IP1-AS1	Homo sapiens PIK3IP1 antisense RNA 1 (head to head) (PIK3IP1-AS1), long non-coding RNA. (from RefSeq NR_110542)
Z271	0	0	-0.8415	NM_175734	uc002ggw.4	C17orf74	Homo sapiens chromosome 17 open reading frame 74 (C17orf74), mRNA. (from RefSeq NM_175734)
Z1441	0	0	-0.8413	NR_104225	uc061fxj.1	SH3YL1	Homo sapiens SH3 and SYLF domain containing 1 (SH3YL1), transcript variant 7, non-coding RNA. (from RefSeq NR_104225)
Z318	0	0	-0.8333	NR_033957	uc031wez.1	ANXA8L1	Homo sapiens long intergenic non-protein coding RNA 842 (LINC00842), long non-coding RNA. (from RefSeq NR_033957)
Z4478	0	0	-0.8329	NM_017890	uc003yiv.5	VPS13B	Homo sapiens vacuolar protein sorting 13 homolog B (yeast) (VPS13B), transcript variant 5, mRNA. (from RefSeq NM_017890)
Z3962	0	0	-0.8329	NM_000091	uc002vom.2	COL4A3	Homo sapiens collagen, type IV, alpha 3 (Goodpasture antigen) (COL4A3), mRNA. (from RefSeq NM_000091)
Z2956	0	0	-0.832	NR_034122	uc003khe.3	CKMT2-AS1	Homo sapiens CKMT2 antisense RNA 1 (CKMT2-AS1), transcript variant 2, long non-coding RNA. (from RefSeq NR_034122)
Z48	0	0	-0.8295	NM_004793	uc002mcx.5	LONP1	Homo sapiens lon peptidase 1, mitochondrial (LONP1), transcript variant 1, mRNA. (from RefSeq NM_004793)
Z3912	0	0	-0.8281	NM_001136205	uc002kvw.6	KCTD1	Homo sapiens potassium channel tetramerization domain containing 1 (KCTD1), transcript variant 1, mRNA. (from RefSeq NM_001136205)
Z3428	0	0	-0.8273	NM_001199417	uc021twd.2	ARHGAP23	Homo sapiens Rho GTPase activating protein 23 (ARHGAP23), mRNA. (from RefSeq NM_001199417)
Z83	0	0	-0.8266	NM_003893	uc001kuk.6	LDB1	Homo sapiens LIM domain binding 1 (LDB1), transcript variant 3, mRNA. (from RefSeq NM_003893)
Z3287	0	0	-0.8244	NM_001104631	uc003jsa.4	PDE4D	Homo sapiens phosphodiesterase 4D, cAMP-specific (PDE4D), transcript variant 1, mRNA. (from RefSeq NM_001104631)
Z4195	0	0	-0.8239	NM_022359	uc001emh.4	PDE4DIP	Homo sapiens phosphodiesterase 4D interacting protein (PDE4DIP), transcript variant 3, mRNA. (from RefSeq NM_022359)
Z2145	0	0	-0.8232	NM_144651	uc003xqu.5	PXDNL	Homo sapiens peroxidasin-like (PXDNL), mRNA. (from RefSeq NM_144651)
Z3417	0	0	-0.8227	NM_001286473	uc010atu.5	C14orf159	Homo sapiens chromosome 14 open reading frame 159 (C14orf159), transcript variant 9, mRNA. (from RefSeq NM_001286473)
Z1395	0	0	-0.822	NM_001143677	uc011ecw.3	SGK1	Homo sapiens serum/glucocorticoid regulated kinase 1 (SGK1), transcript variant 3, mRNA. (from RefSeq NM_001143677)
Z2968	0	0	0.8202	NM_014495	uc001das.3	ANGPTL3	Homo sapiens angiopoietin-like 3 (ANGPTL3), mRNA. (from RefSeq NM_014495)
Z4607	0	0	0.8242	NM_032273	uc001par.4	TMEM126A	Homo sapiens transmembrane protein 126A (TMEM126A), transcript variant 1, mRNA. (from RefSeq NM_032273)
Z1090	0	0	0.8244	NR_003925	uc031zpc.2	RNU4-1	Homo sapiens RNA, U4 small nuclear 1 (RNU4-1), small nuclear RNA. (from RefSeq NR_003925)
Z4196	0	0	0.8444	NM_007266	uc010ymc.3	GPN1	Homo sapiens GPN-loop GTPase 1 (GPN1), transcript variant 1, mRNA. (from RefSeq NM_007266)
Z4406	0	0	0.8477	NM_207398	uc001dna.2	GBP7	Homo sapiens guanylate binding protein 7 (GBP7), mRNA. (from RefSeq NM_207398)
Z2960	0	0	0.8492	NM_006851	uc001sxs.4	GLIPR1	Homo sapiens GLI pathogenesis-related 1 (GLIPR1), mRNA. (from RefSeq NM_006851)
Z42	0	0	0.8529	NM_001554	uc001dle.4	CYR61	Homo sapiens cysteine-rich, angiogenic inducer, 61 (CYR61), mRNA. (from RefSeq NM_001554)
Z3900	0	0	0.8561	NM_152850	uc003zwf.4	PIGO	Homo sapiens phosphatidylinositol glycan anchor biosynthesis, class O (PIGO), transcript variant 2, mRNA. (from RefSeq NM_152850)
