# Supplementary material for: Antagonistic Interactions in Mitochondria ROS Signaling Responses to Manganese
Source: Antioxidants (Basel). 2023 Mar 25;12(4):804. doi: 10.3390/antiox12040804 (PMC10134992; doi:10.3390/antiox12040804)
Supplement: Supplementary file 1 [file antioxidants-12-00804-s001.zip › Table S4.xlsx]

## Sheet: Sheet2
Supplemental Table S4: Annotation of metabolic features associated with Community 2a (mtOx) at |r|>0.8 (P<0.05)
note: Value of r below correlation threshold <0.8 is denoted as 0
Annotations are from xMSannotator with 10 ppm tolerance using HMDB and KEGG database. Many of the common metabolites have been previously confirmed by coelution and MS/MS relative to authentic standards but are considered here as annotations because MS/MS of adduct forms have not been confirmed.
Features without annotations deemed useful by the authors are listed as "unknown".
ID	|r| mtROS	|r| mtH2O2	|r| SOD2	m/z	RT (sec)	Annotation	Formula	Adduct	Chemical_ID	Annotation Score
Y447	-0.8389	-0.8409	-0.8825	158.097	77.5	Methylsalsolinol	C11H15NO2	M+H-2H2O	HMDB03626	4
Y1566	0	0	-0.8663	387.18	43.9	Carboxy-leukotriene-B4	C20H30O6	M+Na[1+]	C05950	4
Y121	0	0.8351	0	112.956	284.3	Dichloroacetaldehyde	C2H2Cl2O	M+H	HMDB60357	3
Y1882	0	-0.8201	0	513.377	175.9	Deoxyestradiol	C18H24O	2M+H	C14239	4
Y1017	0	0	-0.8325	251.124	216.2	Hexenoic acid	C6H10O2	2M+Na	HMDB31501	4
Y1298	-0.8256	0	-0.9064	316.212	66.8	Hydroxytetradecanedioic acid	C14H26O5	M+ACN+H	HMDB00394	4
Y1098	-0.8753	0	0	271.227	513	Oxohexadecanoic acid	C16H30O3	M+H	HMDB10733	3
Y360	-0.9315	-0.9483	-0.951	147.629	261.6	Androstane	C19H32O2	M(C13)+2H[2+]	CE2209	4
Y491	-0.8347	0	0	162.076	45.4	Aminoadipic acid	C6H11NO4	M+H	HMDB00510	3
Y619	0.8262	0.832	0.8847	183.037	251.4	Aminomalonic acid	C3H5NO4	M+ACN+Na	HMDB01147	4
Y635	0	0.8565	0	185.63	282.8	Arginyl-leucine	C12H25N5O3	M+2ACN+2H	HMDB28713	4
Y937	0	0	-0.8643	237.117	43.5	Asparaginyl-serine	C7H13N3O5	M+NH4	HMDB28740	4
Y286	0.8741	0	0	136.041	274.1	Aspartate	C4H7NO4	M(S34)+H[1+]	C00049	4
Y1822	0.9082	0.9134	0.8326	485.283	165.3	Butyrylcarnitine	C11H21NO4	2M+Na	HMDB02013	4
Y2216	0.8231	0	0	702.645	117.1	Cer (18:1, 22:1)	C40H77NO3	M+2ACN+H	HMDB11775	4
Y1046	0.8964	0.8519	0.876	257.075	91.2	Aconitic acid	C6H6O6	M+2ACN+H	HMDB00072	4
Y1701	-0.8262	-0.8203	-0.835	431.073	280.4	CMP-aminoethylphosphonate	C11H20N4O10P2	M+H	HMDB60067	3
Y2129	0	0.8539	0	654.273	295	Coproporphyrin	C36H38N4O8	M[1+]	C05770	4
Y839	0.8351	0.9098	0.8298	217.637	43.4	CPA (16:0, 0:0)	C19H37O6P	M+ACN+2H	HMDB07003	4
Y287	0.8266	0	0	136.048	109.5	Creatinine	C4H7N3O	M+Na	HMDB00562	4
Y1480	0.9651	0.9459	0.9216	360.829	233.5	DG (16:0, 24:1, 0:0)	C43H82O5	M+ACN+2H	HMDB07123	4
Y2491	0	-0.8206	0	819.047	337.1	Diadenosine tetraphosphate	C20H28N10O19P4	M+H-H2O	HMDB01211	4
Y884	-0.9064	-0.9422	-0.9186	225.11	492.2	Dihydrolipoamide	C8H17NOS2	M+NH4	HMDB00985	4
Y94	-0.8523	-0.875	-0.9179	106.069	178.7	Dimethylglycine	C4H9NO2	M(Cl37)+H[1+]	C01026	4
Y744	-0.9043	-0.9027	-0.934	201.185	548.7	Dodecanoic acid	C12H24O2	M+H	HMDB00638	3
Y1040	-0.8227	-0.8477	0	256.025	245.7	Dopamine sulfate	C8H11NO5S	M+Na	HMDB04148	4
Y2056	0.8508	0.8826	0.8295	613.34	168.7	Dynorphin A	C53H85N17O14	M+ACN+2H	HMDB12934	4
Y2408	-0.9544	-0.961	-0.9563	786.48	102	Ganglioside GD3 (18:1, 24:1)	C76H135N3O29	M+H+NH4	HMDB04917	4
Y602	0	0	-0.8442	179.054	253	Gluconolactone	C6H10O6	M+H	HMDB00150	3
Y1433	-0.9179	-0.8897	-0.9294	351.987	219.8	Glutathioselenol; GSSeH	C10H17N3O6SSe	M+H-2H2O	C18871	4
Y956	0.8413	0	0.8247	240.232	46	Hexacosanoic acid	C26H52O2	M+2ACN+2H	HMDB02356	4
Y1141	0.8468	0.8458	0.8837	280.264	46	Hexadecenal	C16H30O	M+ACN+H	HMDB60482	4
Y1392	-0.9157	-0.9095	-0.9489	341.003	370.1	Hexose bisphosphate	C6H14O12P2	M+H[1+]	C00354	4
Y241	0	0	-0.8663	131.023	262.5	Hexose phosphate	C6H13O9P	M+2H	HMDB00124	4
Y260	0	0	-0.9018	133.086	544.1	Hydroxyisocaproic acid	C6H12O3	M+H	HMDB00746	3
Y219	-0.8779	-0.942	-0.8458	127.05	536	Imidazoleacetic acid	C5H6N2O2	M+H	HMDB02024	3
Y366	-0.8472	-0.8463	-0.9052	148.04	544.6	Indole quinone	C8H5NO2	M+H[1+]	C05579	4
Y1741	0	0	-0.8225	446.255	307.3	Isopentenyladenine-glucoside	C17H25N5O4	M+2ACN+H	HMDB12240	4
Y85	-0.8746	0	0	103.076	524.4	Isovaleric acid	C5H10O2	M+H	HMDB00718	3
Y551	-0.853	-0.9155	-0.8794	172.061	47.6	Itaconic acid	C5H6O4	M+ACN+H	HMDB02092	4
Y552	0.8236	0	0	172.086	78.7	Glutamyl-hydroxyproline	C10H16N2O6	M+2ACN+2H	HMDB11161	4
Y591	0.8646	0	0.8364	177.99	140.9	Aspartyl-phosphate	C4H8NO7P	M+H-2H2O	HMDB12250	4
Y963	-0.9429	-0.939	-0.9102	241.031	260.1	Cystine	C6H12N2O4S2	M+H	HMDB00192	3
Y1139	-0.931	-0.9197	-0.8883	279.232	44.1	Linolenic acid	C18H30O2	M+H	HMDB01388	3
Y771	-0.864	-0.8315	0	206.067	318	Lipoamide	C8H15NOS2	M+H	HMDB00962	3
Y278	0.8258	0	0	135.092	388	Ornithine	C5H12N2O2	M(S34)+H[1+]	C00077	4
Y898	-0.8908	-0.898	-0.9262	227.079	84.9	Tryptophan	C11H12N2O2	M+Na	HMDB00929	4
Y1834	-0.8674	-0.8768	-0.9401	494.325	214.4	LysoPC (16:1)	C24H48NO7P	M+H	HMDB10383	3
Y791	0.8849	0.9179	0.8397	209.983	229.6	Methyl (propenylthio) selenide	C4H8SSe	M+ACN+H	HMDB30877	4
Y1469	0	0	-0.8572	359.316	226.9	MG (18:0, 0:0, 0:0)	C21H42O4	M+H	HMDB11131	3
Y1470	-0.9142	-0.914	-0.9472	359.316	41.4	MG (18:0, 0:0, 0:0)	C21H42O4	M+H	HMDB11131	3
Y1673	-0.8233	-0.8653	-0.8256	421.233	157	MG (20:5, 0:0, 0:0)	C23H36O4	M+2Na-H	HMDB11580	4
Y975	0	0	-0.8539	243.183	233.2	Methyllysine	C7H16N2O2	M+2ACN+H	HMDB02038	4
Y709	-0.8243	0	0	195.123	426.3	Acetylhistamine	C7H11N3O	M+ACN+H	HMDB13253	4
Y433	0	0	0.9055	156.101	91	Acetylleucine	C8H15NO3	M+H-H2O	HMDB11756	4
Y371	0	-0.828	-0.8257	148.144	267	Acetylputrescine	C6H14N2O	M+NH4	HMDB02064	4
Y2603	0.8378	0	0	877.439	334.3	neuromedin	C39H53N15O9	M+H[1+]	HMDB13019	4
Y892	0	0.8419	0.8436	226.18	35.4	Undecanoylglycine	C13H25NO3	M+H-H2O	HMDB13286	2
Y1159	0	0.8201	0	284.295	37.5	Octadecanamide	C18H37NO	M+H	HMDB34146	3
Y675	0.8426	0	0	190.994	94.1	Oxoglutaric acid	C5H6O5	M+2Na-H	HMDB00208	4
Y1576	-0.8949	-0.8415	0	392.288	351.7	PA (18:0, 18:2)	C39H73O8P	M+2ACN+2H	HMDB07861	4
Y539	-0.8774	-0.9008	-0.9096	170.154	100.8	Palmitic acid	C16H32O2	M+2ACN+2H	HMDB00220	4
Y1216	0.829	0.8358	0	297.29	44.7	Palmitic amide	C16H33NO	M+ACN+H	HMDB12273	4
Y1445	-0.8487	-0.8812	-0.8235	354.285	550.6	PC (14:0, 16:0)	C38H76NO7P	M+H+NH4	HMDB07895	4
Y2577	-0.8957	0	-0.8481	858.59	118.3	PC (14:1, 24:1)	C46H88NO8P	M+2Na-H	HMDB07927	4
Y2270	-0.8205	0	-0.8557	718.538	174.1	PC (16:1, 15:0)	C39H76NO8P	M+H	HMDB08000	3
Y1668	0.9547	0.946	0.953	418.799	123.2	PC (16:1, 18:3)	C42H76NO8P	M+2ACN+2H	HMDB08007	4
Y2425	0	0	-0.8564	793.557	159.5	PC (16:1, 18:4)	C42H74NO8P	M+ACN+H	HMDB08009	4
Y2455	0	0	-0.8362	807.566	179.8	PC (18:2, 15:0)	C41H78NO8P	M+ACN+Na	HMDB08132	4
Y2222	0	0	-0.8651	704.506	119.2	PC (18:4, 15:0)	C41H74NO8P	M+H-2H2O	HMDB08231	4
Y2578	0	0	-0.8386	858.598	140	PC (20:2, 22:6)	C50H84NO8P	M+H	HMDB08354	3
Y2486	0	-0.8343	0	817.59	178.4	PE (20:2, 18:1)	C43H80NO7P	M+ACN+Na	HMDB09314	4
Y2472	-0.8433	0	0	812.528	119.9	PE (20:4, 22:6)	C47H74NO8P	M+H	HMDB09408	3
Y2511	0	-0.835	-0.9029	828.59	330	PE (22:1, 22:6)	C49H84NO8P	M+H-H2O	HMDB09540	4
Y2319	0	0	-0.8822	751.544	143	PG (16:0, 18:0)	C40H79O10P	M+H	HMDB10572	3
Y2629	-0.8593	-0.8871	0	900.569	178.1	PGP (18:0, 18:0)	C42H84O13P2	M+ACN+H	HMDB13504	4
Y189	0	0	-0.8491	121.065	524.8	Phenylacetaldehyde	C8H8O	M+H	HMDB06236	3
Y446	-0.9047	-0.8842	-0.9378	157.994	229.8	Phosphoglycolic acid	C2H5O6P	M(C13)+H[1+]	C00988	4
Y959	0.8827	0.8727	0.901	240.95	193.2	Phosphoglycolic acid	C2H5O6P	M+HCOOK[1+]	C00988	4
Y2683	0	0	-0.8239	947.5	129.1	PIP (16:0, 22:5)	C47H82O16P2	M+H-H2O	HMDB09937	4
Y547	0.8669	0.9023	0.8316	171.121	35.7	Menthene-thiol	C10H18S	M+H	HMDB38192	3
Y1907	0.8435	0.8427	0.9162	528.354	232.4	Prolyl-Lysine	C11H21N3O3	2M+ACN+H	HMDB29022	4
Y1721	0	0	-0.824	437.194	61.8	Prostaglandin E2	C20H32O5	M+HCOOK[1+]	C00584	4
Y2536	0.9331	0.8804	0.8701	842.592	91.6	PS (18:0, 20:0)	C44H86NO10P	M+Na	HMDB10164	4
Y56	0	0	-0.8438	98.0714	78.3	Pyrimidine	C4H4N2	M+NH4	HMDB03361	4
Y383	0.9369	0.96	0.9153	150.02	122.6	Quinolinic acid	C7H5NO4	M+H-H2O	HMDB00232	4
Y1108	0	0.8228	0	273.04	325.9	Sedoheptulose phosphate	C7H15O10P	M+H-H2O	HMDB60509	4
Y648	0.8667	0	0.862	187.062	208.5	Methylmethionine	C6H14NO2S	M+Na	HMDB38670	4
Y1367	0.8647	0.8241	0	335.074	204.1	Glycerophosphoinositol	C9H19O11P	M+H	HMDB11649	3
Y155	0	0	-0.8255	117.048	48	Glycerophosphoethanolamine	C5H14NO6P	M+H+NH4	HMDB59660	4
Y1146	-0.8345	0	0	281.196	548.3	Spermic acid	C10H23N3O2	M+ACN+Na	HMDB60066	4
Y2579	0.8817	0.8294	0.8715	859.465	281	Spinorphin	C45H64N8O10	M+H-H2O	HMDB59790	4
Y893	0	-0.857	0	226.217	35.1	Tetracosanoic acid	C24H48O2	M+2ACN+2H	HMDB02003	4
Y2653	0.8685	0.8263	0.8348	918.757	175.6	TG (14:0, 20:2, 20:2)	C55H98O6	M+ACN+Na	HMDB42588	4
Y1825	0.8332	0	0	487.964	176.9	TG (16:0, 24:0, 18:2)	C62H116O6	M+H+NH4	HMDB44010	4
Y1693	0	0	-0.8263	428.365	72.9	TG (16:1, 14:1, 16:1)	C49H88O6	M+2ACN+2H	HMDB48567	4
Y610	0.8903	0.9056	0.9345	181.93	99.5	Thiosulfate	HS2O3	M+HCOONa[1+]	C00320	4
Y2758	0.9241	0.9441	0.9396	1003.27	117.2	Enoyl-OPC4-CoA	C35H54N7O18P3S	M+NH4	HMDB11120	4
Y234	0.8752	0.8351	0	130.041	196.2	Tyramine sulfate	C8H11NO4S	M+ACN+2H	HMDB06409	4
Y1018	0	0	-0.8217	251.128	496.5	Ubiquinone-1	C14H18O4	M+H	HMDB02012	3
Y1437	0.9	0.9602	0.8651	352.246	51.7	Undecanoylcarnitine	C18H35NO4	M+Na	HMDB13321	4
Y202	-0.8292	0	-0.8985	124.048	549.1	Urea	CH4N2O	M+ACN+Na	HMDB00294	4
Y404	0	0	-0.8482	153.041	47.8	Xanthine	C5H4N4O2	M+H	HMDB00292	3
Y1435	-0.8417	0	-0.9112	352.055	180.7	Unknown	Unknown	Unknown	Unknown	Unknown
Y824	0.939	0.9238	0.9203	214.253	137.6	Unknown	Unknown	Unknown	Unknown	Unknown
Y1874	-0.8661	0	-0.9127	510.792	128.3	Unknown	Unknown	Unknown	Unknown	Unknown
Y2496	0.868	0	0.8469	819.822	176	Unknown	Unknown	Unknown	Unknown	Unknown
Y2022	0.8544	0.8496	0.8505	588.955	290.4	Unknown	Unknown	Unknown	Unknown	Unknown
Y1978	0.8952	0	0.8409	566.98	174	Unknown	Unknown	Unknown	Unknown	Unknown
Y925	0.9464	0.8785	0.8916	234.543	250.7	Unknown	Unknown	Unknown	Unknown	Unknown
Y1409	-0.8772	-0.8993	-0.8449	346.004	173	Unknown	Unknown	Unknown	Unknown	Unknown
Y603	-0.9806	-0.9739	-0.992	179.064	494.1	Unknown	Unknown	Unknown	Unknown	Unknown
Y194	-0.8461	-0.8384	-0.8528	122.524	255.5	Unknown	Unknown	Unknown	Unknown	Unknown
Y298	-0.8932	-0.8966	-0.8235	138.525	251.3	Unknown	Unknown	Unknown	Unknown	Unknown
Y1891	0	-0.9002	0	519.128	183.6	Unknown	Unknown	Unknown	Unknown	Unknown
Y929	0.8397	0	0	235.066	251.6	Unknown	Unknown	Unknown	Unknown	Unknown
Y1005	0.8891	0.8454	0.8759	248.553	294.1	Unknown	Unknown	Unknown	Unknown	Unknown
Y2858	0.837	0	0.8953	1140.18	109.1	Unknown	Unknown	Unknown	Unknown	Unknown
Y1190	0	0	-0.8306	290.803	127.8	Unknown	Unknown	Unknown	Unknown	Unknown
Y913	-0.9333	-0.8554	-0.8948	230.943	161.4	Unknown	Unknown	Unknown	Unknown	Unknown
Y280	0	-0.8285	0	135.102	474.8	Unknown	Unknown	Unknown	Unknown	Unknown
Y1698	0.9223	0.927	0.9313	430.091	256.5	Unknown	Unknown	Unknown	Unknown	Unknown
Y2081	0	0.8577	0.8203	626.803	91.2	Unknown	Unknown	Unknown	Unknown	Unknown
Y337	-0.9674	-0.9072	-0.9619	145.017	259	Unknown	Unknown	Unknown	Unknown	Unknown
Y1009	-0.8563	0	-0.8403	249.052	295.4	Unknown	Unknown	Unknown	Unknown	Unknown
Y630	0.9731	0.9576	0.9953	184.947	516.3	Unknown	Unknown	Unknown	Unknown	Unknown
Y837	-0.9148	-0.9098	-0.9584	216.632	273.7	Unknown	Unknown	Unknown	Unknown	Unknown
Y877	0.8631	0.8646	0.8864	224.129	245.6	Unknown	Unknown	Unknown	Unknown	Unknown
Y885	0	0	-0.871	225.196	465.4	Unknown	Unknown	Unknown	Unknown	Unknown
Y978	-0.8565	-0.9248	-0.8532	243.942	174.5	Unknown	Unknown	Unknown	Unknown	Unknown
Y1290	0.9824	0.9383	0.9774	314.342	75.9	Unknown	Unknown	Unknown	Unknown	Unknown
Y2141	0.8363	0.8477	0.9074	658.891	393.7	Unknown	Unknown	Unknown	Unknown	Unknown
Y2166	-0.8244	-0.8252	-0.9131	671.226	302	Unknown	Unknown	Unknown	Unknown	Unknown
Y2195	0	0	-0.8446	690.841	318.4	Unknown	Unknown	Unknown	Unknown	Unknown
Y2197	0	0	-0.8536	692.482	117.8	Unknown	Unknown	Unknown	Unknown	Unknown
Y2253	-0.919	-0.9602	-0.8865	713.223	343.8	Unknown	Unknown	Unknown	Unknown	Unknown
Y2421	-0.8668	-0.8423	-0.9162	791.79	296.4	Unknown	Unknown	Unknown	Unknown	Unknown
Y2557	-0.9188	-0.8832	-0.8845	853.314	176.5	Unknown	Unknown	Unknown	Unknown	Unknown
Y2636	0	0	-0.8366	907.457	90.6	Unknown	Unknown	Unknown	Unknown	Unknown
Y9	0.8401	0.8691	0.8356	88.0044	211.3	Unknown	Unknown	Unknown	Unknown	Unknown
Y15	-0.9022	-0.9573	-0.9051	88.9527	266.4	Unknown	Unknown	Unknown	Unknown	Unknown
Y37	0	-0.8205	-0.8683	92.3131	55.6	Unknown	Unknown	Unknown	Unknown	Unknown
Y54	0.9733	0.963	0.9626	98.0137	270	Unknown	Unknown	Unknown	Unknown	Unknown
Y187	0	0	-0.8415	120.129	79	Unknown	Unknown	Unknown	Unknown	Unknown
Y209	0	0	0.8381	124.862	224.4	Unknown	Unknown	Unknown	Unknown	Unknown
Y258	0	-0.8472	-0.8277	132.933	81.3	Unknown	Unknown	Unknown	Unknown	Unknown
Y418	0.8944	0.8708	0.9151	154.6	197.9	Unknown	Unknown	Unknown	Unknown	Unknown
Y420	0.9275	0.9534	0.907	154.967	363.4	Unknown	Unknown	Unknown	Unknown	Unknown
Y463	-0.8464	-0.8464	-0.8212	159.987	228.6	Unknown	Unknown	Unknown	Unknown	Unknown
Y684	-0.8995	-0.8823	-0.8529	191.886	117.8	Unknown	Unknown	Unknown	Unknown	Unknown
Y726	0	0	0.8924	198.876	126.8	Unknown	Unknown	Unknown	Unknown	Unknown
Y747	0	0	-0.8585	201.915	128.1	Unknown	Unknown	Unknown	Unknown	Unknown
Y810	0	0	0.8361	212.381	250.5	Unknown	Unknown	Unknown	Unknown	Unknown
Y1023	0.9476	0.886	0.9354	252.778	288.8	Unknown	Unknown	Unknown	Unknown	Unknown
Y1185	0.8456	0	0.9056	289.493	287.7	Unknown	Unknown	Unknown	Unknown	Unknown
Y1189	-0.8883	-0.9412	-0.9256	290.782	119.4	Unknown	Unknown	Unknown	Unknown	Unknown
Y1199	0.8863	0.8816	0.9488	292.873	165.7	Unknown	Unknown	Unknown	Unknown	Unknown
Y1442	0	0.8677	0	353.938	535.5	Unknown	Unknown	Unknown	Unknown	Unknown
Y1471	0	0	0.8544	359.938	513.3	Unknown	Unknown	Unknown	Unknown	Unknown
Y1826	0	0	-0.8738	488.869	169.4	Unknown	Unknown	Unknown	Unknown	Unknown
Y1910	0	0	-0.8571	528.987	86.3	Unknown	Unknown	Unknown	Unknown	Unknown
Y2132	-0.8616	0	-0.8635	654.717	111.3	Unknown	Unknown	Unknown	Unknown	Unknown
Y2277	-0.8523	-0.8489	-0.8362	721.814	175.9	Unknown	Unknown	Unknown	Unknown	Unknown
Y2880	-0.8524	-0.8991	-0.8792	1200.36	92.4	Unknown	Unknown	Unknown	Unknown	Unknown
Y2887	0	0	0.8315	1212.12	119.4	Unknown	Unknown	Unknown	Unknown	Unknown
Y2919	0	0	-0.8327	1262.32	93.2	Unknown	Unknown	Unknown	Unknown	Unknown
Y941	0.833	0	0	238.533	241.4	Unknown	Unknown	Unknown	Unknown	Unknown
Y1833	0	0	0.8331	493.28	172.8	Unknown	Unknown	Unknown	Unknown	Unknown
Y1947	0.8848	0.8644	0.863	550.805	89.5	Unknown	Unknown	Unknown	Unknown	Unknown
Y2850	0	0	-0.8475	1123.57	326.2	Unknown	Unknown	Unknown	Unknown	Unknown
Y2898	-0.8523	-0.854	-0.8386	1226.1	114.8	Unknown	Unknown	Unknown	Unknown	Unknown
Y316	-0.8517	-0.8549	0	142.959	317.1	Unknown	Unknown	Unknown	Unknown	Unknown
Y345	-0.864	-0.8414	-0.8569	145.939	127.3	Unknown	Unknown	Unknown	Unknown	Unknown
Y430	0.954	0.9139	0.9252	155.521	293.5	Unknown	Unknown	Unknown	Unknown	Unknown
Y439	-0.8609	0	0	157.009	241.9	Unknown	Unknown	Unknown	Unknown	Unknown
Y440	0	0	-0.827	157.02	291.2	Unknown	Unknown	Unknown	Unknown	Unknown
Y476	-0.8279	-0.8468	0	160.969	176.6	Unknown	Unknown	Unknown	Unknown	Unknown
Y644	-0.8555	-0.8424	0	186.963	139.9	Unknown	Unknown	Unknown	Unknown	Unknown
Y655	0	0.828	0	187.961	266.5	Unknown	Unknown	Unknown	Unknown	Unknown
Y833	0.9243	0.8701	0.8786	215.98	117.8	Unknown	Unknown	Unknown	Unknown	Unknown
Y944	0.8451	0.8822	0	238.968	117.4	Unknown	Unknown	Unknown	Unknown	Unknown
Y1142	-0.8881	-0.851	0	280.753	118.5	Unknown	Unknown	Unknown	Unknown	Unknown
Y1208	0.8947	0.8489	0.8552	294.866	153.3	Unknown	Unknown	Unknown	Unknown	Unknown
Y1262	0.9202	0.9326	0.8441	308.858	220.5	Unknown	Unknown	Unknown	Unknown	Unknown
Y1500	0	0.8274	0	366.454	511.2	Unknown	Unknown	Unknown	Unknown	Unknown
Y1513	0.8576	0.908	0.8453	369.701	173.5	Unknown	Unknown	Unknown	Unknown	Unknown
Y1569	0.8633	0.8264	0	387.978	167.4	Unknown	Unknown	Unknown	Unknown	Unknown
Y1737	0.9402	0.861	0.9208	443.906	186	Unknown	Unknown	Unknown	Unknown	Unknown
Y1761	0	0	0.8398	452.854	155.3	Unknown	Unknown	Unknown	Unknown	Unknown
Y1767	-0.892	-0.8679	-0.8735	454.749	117	Unknown	Unknown	Unknown	Unknown	Unknown
Y1773	0.8368	0	0.9016	456.745	175.4	Unknown	Unknown	Unknown	Unknown	Unknown
Y1839	0	0.856	0	494.839	175.1	Unknown	Unknown	Unknown	Unknown	Unknown
Y2065	0.8467	0	0	619.77	90.8	Unknown	Unknown	Unknown	Unknown	Unknown
Y2076	-0.8631	0	-0.8418	624.847	169.4	Unknown	Unknown	Unknown	Unknown	Unknown
Y2177	-0.8219	-0.8939	0	677.73	91.4	Unknown	Unknown	Unknown	Unknown	Unknown
Y2226	0	0.8562	0	704.754	98.3	Unknown	Unknown	Unknown	Unknown	Unknown
Y2262	0.8479	0	0.8971	714.795	175.7	Unknown	Unknown	Unknown	Unknown	Unknown
Y2515	0.841	0	0.9021	832.792	176.2	Unknown	Unknown	Unknown	Unknown	Unknown
Y2681	0.8739	0	0	944.755	87.9	Unknown	Unknown	Unknown	Unknown	Unknown
