# Supplementary material for: Antagonistic Interactions in Mitochondria ROS Signaling Responses to Manganese
Source: Antioxidants (Basel). 2023 Mar 25;12(4):804. doi: 10.3390/antiox12040804 (PMC10134992; doi:10.3390/antiox12040804)
Supplement: Supplementary file 1 [file antioxidants-12-00804-s001.zip › Table S5.xlsx]

## Sheet: Thiols_Genes
Supplemental Table S5: Genes associated with Community 2b (cellular thiols) at |r|>0.8 (P<0.05)
ID	|r|	RefSeq ID	KEGG ID	Gene name	Gene_description
Z2452	-0.9902	NM_001287061	uc011kee.4	RABGEF1	Homo sapiens RAB guanine nucleotide exchange factor (GEF) 1 (RABGEF1), transcript variant 2, mRNA. (from RefSeq NM_001287061)
Z3291	-0.973	NM_001289978	uc021uty.2	DPF1	Homo sapiens D4, zinc and double PHD fingers family 1 (DPF1), transcript variant 4, mRNA. (from RefSeq NM_001289978)
Z3874	-0.9728	NM_172069	uc010yny.3	PLEKHH2	Homo sapiens pleckstrin homology domain containing, family H (with MyTH4 domain) member 2 (PLEKHH2), mRNA. (from RefSeq NM_172069)
Z3832	-0.9661	NM_001204193	uc003kqb.3	SRP19	Homo sapiens signal recognition particle 19kDa (SRP19), transcript variant 2, mRNA. (from RefSeq NM_001204193)
Z4413	-0.9639	NM_001130849	uc010fxq.4	CAB39	Homo sapiens calcium binding protein 39 (CAB39), transcript variant 2, mRNA. (from RefSeq NM_001130849)
Z1673	-0.9636	NM_001025159	uc003lsc.4	CD74	Homo sapiens CD74 molecule, major histocompatibility complex, class II invariant chain (CD74), transcript variant 1, mRNA. (from RefSeq NM_001025159)
Z4319	-0.963	NM_001127207	uc002vgd.5	SMARCAL1	Homo sapiens SWI/SNF related, matrix associated, actin dependent regulator of chromatin, subfamily a-like 1 (SMARCAL1), transcript variant 2, mRNA. (from RefSeq NM_001127207)
Z3237	-0.9594	NM_016603	uc003lbz.3	FAM13B	Homo sapiens family with sequence similarity 13, member B (FAM13B), transcript variant 1, mRNA. (from RefSeq NM_016603)
Z1973	-0.9533	NM_012208	uc003lgx.5	HARS2	Homo sapiens histidyl-tRNA synthetase 2, mitochondrial (HARS2), transcript variant 1, mRNA. (from RefSeq NM_012208)
Z2043	-0.9514	NM_000960	uc002pex.4	PTGIR	Homo sapiens prostaglandin I2 (prostacyclin) receptor (IP) (PTGIR), mRNA. (from RefSeq NM_000960)
Z2508	-0.9511	NM_001816	uc002oud.3	CEACAM8	Homo sapiens carcinoembryonic antigen-related cell adhesion molecule 8 (CEACAM8), mRNA. (from RefSeq NM_001816)
Z1818	-0.9503	NM_198682	uc003ijj.4	GYPE	Homo sapiens glycophorin E (MNS blood group) (GYPE), transcript variant 2, mRNA. (from RefSeq NM_198682)
Z3394	-0.9484	NM_178043	uc062zmr.1	LARP1B	Homo sapiens La ribonucleoprotein domain family, member 1B (LARP1B), transcript variant 2, mRNA. (from RefSeq NM_178043)
Z3309	-0.9482	NM_005960	uc033aad.2	MUC3A	Homo sapiens mucin 3A, cell surface associated (MUC3A), mRNA. (from RefSeq NM_005960)
Z134	-0.9479	NM_020427	uc003ywy.3	SLURP1	Homo sapiens secreted LY6/PLAUR domain containing 1 (SLURP1), mRNA. (from RefSeq NM_020427)
Z3771	-0.9448	NM_002022	uc001gho.4	FMO4	Homo sapiens flavin containing monooxygenase 4 (FMO4), mRNA. (from RefSeq NM_002022)
Z2265	-0.943	NM_144575	uc061hvv.1	CAPN13	Homo sapiens calpain 13 (CAPN13), mRNA. (from RefSeq NM_144575)
Z3286	-0.9419	NM_001278553	uc002jlu.2	GRIN2C	Homo sapiens glutamate receptor, ionotropic, N-methyl D-aspartate 2C (GRIN2C), transcript variant 2, mRNA. (from RefSeq NM_001278553)
Z948	-0.9391	NM_001008505	uc003qpo.3	OPRM1	Homo sapiens opioid receptor, mu 1 (OPRM1), transcript variant MOR-1X, mRNA. (from RefSeq NM_001008505)
Z4359	-0.9342	NM_001007246	uc002yxm.4	BRWD1	Homo sapiens bromodomain and WD repeat domain containing 1 (BRWD1), transcript variant 3, mRNA. (from RefSeq NM_001007246)
Z2504	-0.9342	NM_032995	uc032ocg.2	ARHGEF4	Homo sapiens Rho guanine nucleotide exchange factor (GEF) 4 (ARHGEF4), transcript variant 2, mRNA. (from RefSeq NM_032995)
Z878	-0.9331	NM_001204091	uc003ojn.3	RPS10	Homo sapiens ribosomal protein S10 (RPS10), transcript variant 3, mRNA. (from RefSeq NM_001204091)
Z3726	-0.9271	NM_001201475	uc021uiu.2	C18orf21	Homo sapiens chromosome 18 open reading frame 21 (C18orf21), transcript variant 3, mRNA. (from RefSeq NM_001201475)
Z3355	-0.9262	NM_001560	uc004eqs.4	IL13RA1	Homo sapiens interleukin 13 receptor, alpha 1 (IL13RA1), mRNA. (from RefSeq NM_001560)
Z2823	-0.9257	NM_032918	uc001rct.4	RERG	Homo sapiens RAS-like, estrogen-regulated, growth inhibitor (RERG), transcript variant 1, mRNA. (from RefSeq NM_032918)
Z4632	-0.9247	NM_001301056	uc001hjy.4	VASH2	Homo sapiens vasohibin 2 (VASH2), transcript variant 4, mRNA. (from RefSeq NM_001301056)
Z3099	-0.9235	NM_001281441	uc032zso.2	WBSCR16	Homo sapiens Williams-Beuren syndrome chromosome region 16 (WBSCR16), transcript variant 3, mRNA. (from RefSeq NM_001281441)
Z3017	-0.9235	NM_005603	uc002lgw.5	ATP8B1	Homo sapiens ATPase, aminophospholipid transporter, class I, type 8B, member 1 (ATP8B1), mRNA. (from RefSeq NM_005603)
Z2261	-0.9232	NR_126007	uc059wnt.1	RP11-296I10.3	Homo sapiens uncharacterized LOC400541 (LOC400541), long non-coding RNA. (from RefSeq NR_126007)
Z3812	-0.9229	NR_103535	uc031uek.1	NEXN-AS1	Homo sapiens NEXN antisense RNA 1 (NEXN-AS1), long non-coding RNA. (from RefSeq NR_103535)
Z2939	-0.9154	NM_005627	uc003qen.5	SGK1	Homo sapiens serum/glucocorticoid regulated kinase 1 (SGK1), transcript variant 1, mRNA. (from RefSeq NM_005627)
Z1369	-0.914	NM_173477	uc032fra.2	USH1G	Homo sapiens Usher syndrome 1G (autosomal recessive) (USH1G), transcript variant 1, mRNA. (from RefSeq NM_173477)
Z2047	-0.9102	NM_021197	uc002fhw.5	WFDC1	Homo sapiens WAP four-disulfide core domain 1 (WFDC1), transcript variant 1, mRNA. (from RefSeq NM_021197)
Z3893	-0.9095	NM_001270455	uc059wmm.1	WWP2	Homo sapiens WW domain containing E3 ubiquitin protein ligase 2 (WWP2), transcript variant 6, mRNA. (from RefSeq NM_001270455)
Z1714	-0.9093	NM_001280800	uc003uat.5	GTF2I	Homo sapiens general transcription factor IIi (GTF2I), transcript variant 6, mRNA. (from RefSeq NM_001280800)
Z1752	-0.908	NM_001145815	uc010uwc.3	AMDHD2	Homo sapiens amidohydrolase domain containing 2 (AMDHD2), transcript variant 2, mRNA. (from RefSeq NM_001145815)
Z1674	-0.9059	NM_054023	uc003lot.3	SCGB3A2	Homo sapiens secretoglobin, family 3A, member 2 (SCGB3A2), mRNA. (from RefSeq NM_054023)
Z137	-0.9055	NM_001198593	uc021vhf.1	STON1-GTF2A1L	Homo sapiens STON1-GTF2A1L readthrough (STON1-GTF2A1L), transcript variant 2, mRNA. (from RefSeq NM_001198593)
Z980	-0.9053	NM_021957	uc001rfb.3	GYS2	Homo sapiens glycogen synthase 2 (liver) (GYS2), mRNA. (from RefSeq NM_021957)
Z247	-0.8994	NR_039886	uc021tui.1	MIR4733	Homo sapiens microRNA 4733 (MIR4733), microRNA. (from RefSeq NR_039886)
Z364	-0.899	NM_032214	uc002xfv.4	SLA2	Homo sapiens Src-like-adaptor 2 (SLA2), transcript variant 1, mRNA. (from RefSeq NM_032214)
Z139	-0.8981	NM_001033083	uc057tqd.1	PBLD	Homo sapiens phenazine biosynthesis-like protein domain containing (PBLD), transcript variant 2, mRNA. (from RefSeq NM_001033083)
Z458	-0.8958	NM_001142568	uc010hpr.5	BBX	Homo sapiens bobby sox homolog (Drosophila) (BBX), transcript variant 1, mRNA. (from RefSeq NM_001142568)
Z4342	-0.8958	NM_001174070	uc021xkl.1	FAM53A	Homo sapiens family with sequence similarity 53, member A (FAM53A), transcript variant 2, mRNA. (from RefSeq NM_001174070)
Z666	-0.8949	NR_105006	uc033bqc.2	LINC01111	Homo sapiens long intergenic non-protein coding RNA 1111 (LINC01111), long non-coding RNA. (from RefSeq NR_105006)
Z2963	-0.8925	NM_004616	uc001swj.2	TSPAN8	Homo sapiens tetraspanin 8 (TSPAN8), mRNA. (from RefSeq NM_004616)
Z4718	-0.8878	NM_017912	uc011cdi.3	HERC6	Homo sapiens HECT and RLD domain containing E3 ubiquitin protein ligase family member 6 (HERC6), transcript variant 1, mRNA. (from RefSeq NM_017912)
Z3335	-0.8875	NR_049816	uc031qxb.1	MIR5093	Homo sapiens microRNA 5093 (MIR5093), microRNA. (from RefSeq NR_049816)
Z3591	-0.8873	NM_000812	uc003gxh.4	GABRB1	Homo sapiens gamma-aminobutyric acid (GABA) A receptor, beta 1 (GABRB1), mRNA. (from RefSeq NM_000812)
Z534	-0.8845	NR_110512	uc062dxj.1	RP1-63G5.5	Homo sapiens extracellular leucine-rich repeat and fibronectin type III domain containing 2 (ELFN2), transcript variant 2, non-coding RNA. (from RefSeq NR_110512)
Z2517	-0.8824	NM_001282679	uc010mwx.5	GAPVD1	Homo sapiens GTPase activating protein and VPS9 domains 1 (GAPVD1), transcript variant 1, mRNA. (from RefSeq NM_001282679)
Z4081	-0.8821	NR_027098	uc061hyt.1	LINC00486	Homo sapiens long intergenic non-protein coding RNA 486 (LINC00486), transcript variant 1, long non-coding RNA. (from RefSeq NR_027098)
Z3493	-0.8809	NM_033668	uc001iwr.5	ITGB1	Homo sapiens integrin, beta 1 (fibronectin receptor, beta polypeptide, antigen CD29 includes MDF2, MSK12) (ITGB1), transcript variant 1D, mRNA. (from RefSeq NM_033668)
Z1807	-0.8796	NM_020733	uc003ehs.4	HEG1	Homo sapiens heart development protein with EGF-like domains 1 (HEG1), mRNA. (from RefSeq NM_020733)
Z2834	-0.8788	NM_000899	uc001tav.4	KITLG	Homo sapiens KIT ligand (KITLG), transcript variant b, mRNA. (from RefSeq NM_000899)
Z3226	-0.8774	NM_014730	uc001tyy.2	MLEC	Homo sapiens malectin (MLEC), transcript variant 1, mRNA. (from RefSeq NM_014730)
Z2010	-0.8767	NM_005824	uc003vat.4	LRRC17	Homo sapiens leucine rich repeat containing 17 (LRRC17), transcript variant 2, mRNA. (from RefSeq NM_005824)
Z1065	-0.876	NM_001136017	uc003orp.5	CCND3	Homo sapiens cyclin D3 (CCND3), transcript variant 1, mRNA. (from RefSeq NM_001136017)
Z760	-0.8747	NM_001300925	uc060vbq.1	SMIM7	Homo sapiens small integral membrane protein 7 (SMIM7), transcript variant 1, mRNA. (from RefSeq NM_001300925)
Z4291	-0.8744	NM_000885	uc002unu.4	ITGA4	Homo sapiens integrin, alpha 4 (antigen CD49D, alpha 4 subunit of VLA-4 receptor) (ITGA4), mRNA. (from RefSeq NM_000885)
Z1104	-0.8735	NR_027424	uc011kws.2	FAM66E	Homo sapiens family with sequence similarity 66, member E (FAM66E), long non-coding RNA. (from RefSeq NR_027424)
Z3312	-0.8728	NM_001143823	uc002kmr.4	ZBTB14	Homo sapiens zinc finger and BTB domain containing 14 (ZBTB14), transcript variant 1, mRNA. (from RefSeq NM_001143823)
Z1558	-0.8716	NR_036087	uc021xaj.1	MIR3136	Homo sapiens microRNA 3136 (MIR3136), microRNA. (from RefSeq NR_036087)
Z663	-0.8692	NR_038993	uc003ebo.3	ZBTB20-AS1	Homo sapiens ZBTB20 antisense RNA 1 (ZBTB20-AS1), long non-coding RNA. (from RefSeq NR_038993)
Z3390	-0.8685	NM_001008539	uc064kns.1	SLC7A2	Homo sapiens solute carrier family 7 (cationic amino acid transporter, y+ system), member 2 (SLC7A2), transcript variant 2, mRNA. (from RefSeq NM_001008539)
Z2136	-0.8676	NM_031501	uc003lhj.2	PCDHA5	Homo sapiens protocadherin alpha 5 (PCDHA5), transcript variant 2, mRNA. (from RefSeq NM_031501)
Z210	-0.8668	NM_153711	uc003pwy.4	FAM26E	Homo sapiens family with sequence similarity 26, member E (FAM26E), mRNA. (from RefSeq NM_153711)
Z4661	-0.8662	NM_201266	uc002vaw.3	NRP2	Homo sapiens neuropilin 2 (NRP2), transcript variant 1, mRNA. (from RefSeq NM_201266)
Z2864	-0.8646	NM_001031847	uc001oof.5	CPT1A	Homo sapiens carnitine palmitoyltransferase 1A (liver) (CPT1A), transcript variant 2, mRNA. (from RefSeq NM_001031847)
Z4859	-0.8645	NM_201612	uc001tfv.5	IKBIP	Homo sapiens IKBKB interacting protein (IKBIP), transcript variant 2, mRNA. (from RefSeq NM_201612)
Z4088	-0.8639	NM_005246	uc003kop.2	FER	Homo sapiens fer (fps/fes related) tyrosine kinase (FER), transcript variant 1, mRNA. (from RefSeq NM_005246)
Z862	-0.8634	NM_003004	uc002keo.4	SECTM1	Homo sapiens secreted and transmembrane 1 (SECTM1), mRNA. (from RefSeq NM_003004)
Z238	-0.8634	NM_001199121	uc003nqf.3	RPP21	Homo sapiens ribonuclease P/MRP 21kDa subunit (RPP21), transcript variant 3, mRNA. (from RefSeq NM_001199121)
Z2240	-0.8633	NM_133448	uc009zyl.2	TMEM132D	Homo sapiens transmembrane protein 132D (TMEM132D), mRNA. (from RefSeq NM_133448)
Z2024	-0.8593	NM_001001715	uc001vni.5	FARP1	Homo sapiens FERM, RhoGEF (ARHGEF) and pleckstrin domain protein 1 (chondrocyte-derived) (FARP1), transcript variant 2, mRNA. (from RefSeq NM_001001715)
Z4643	-0.8554	NM_001247997	uc001ucg.2	CLIP1	Homo sapiens CAP-GLY domain containing linker protein 1 (CLIP1), transcript variant 3, mRNA. (from RefSeq NM_001247997)
Z3876	-0.8549	NM_181506	uc011cqs.1	LRRC70	Homo sapiens leucine rich repeat containing 70 (LRRC70), mRNA. (from RefSeq NM_181506)
Z1925	-0.8535	NM_015660	uc003who.4	GIMAP2	Homo sapiens GTPase, IMAP family member 2 (GIMAP2), mRNA. (from RefSeq NM_015660)
Z748	-0.8524	NM_023015	uc001fct.4	INTS3	Homo sapiens integrator complex subunit 3 (INTS3), mRNA. (from RefSeq NM_023015)
Z4470	-0.8519	NM_030824	uc002mtr.2	ZNF442	Homo sapiens zinc finger protein 442 (ZNF442), mRNA. (from RefSeq NM_030824)
Z269	-0.851	NM_001160328	uc010ycd.3	SYT3	Homo sapiens synaptotagmin III (SYT3), transcript variant 2, mRNA. (from RefSeq NM_001160328)
Z569	-0.8492	NM_018293	uc003dqv.4	ZNF654	Homo sapiens zinc finger protein 654 (ZNF654), mRNA. (from RefSeq NM_018293)
Z3083	-0.8476	NM_003898	uc003qqx.3	SYNJ2	Homo sapiens synaptojanin 2 (SYNJ2), transcript variant 1, mRNA. (from RefSeq NM_003898)
Z2960	-0.8471	NM_006851	uc001sxs.4	GLIPR1	Homo sapiens GLI pathogenesis-related 1 (GLIPR1), mRNA. (from RefSeq NM_006851)
Z1993	-0.846	NM_001162498	uc058wym.1	LPAR6	Homo sapiens lysophosphatidic acid receptor 6 (LPAR6), transcript variant 3, mRNA. (from RefSeq NM_001162498)
Z3300	-0.8447	NM_001146055	uc003hsr.4	SNCA	Homo sapiens synuclein, alpha (non A4 component of amyloid precursor) (SNCA), transcript variant 3, mRNA. (from RefSeq NM_001146055)
Z897	-0.8442	NR_110596	uc001swn.3	LGR5	Homo sapiens leucine-rich repeat containing G protein-coupled receptor 5 (LGR5), transcript variant 4, non-coding RNA. (from RefSeq NR_110596)
Z4321	-0.8432	NM_138499	uc001lll.5	PWWP2B	Homo sapiens PWWP domain containing 2B (PWWP2B), transcript variant 1, mRNA. (from RefSeq NM_138499)
Z3311	-0.843	NM_012445	uc003gco.5	SPON2	Homo sapiens spondin 2, extracellular matrix protein (SPON2), transcript variant 1, mRNA. (from RefSeq NM_012445)
Z3825	-0.8413	NM_152496	uc001cbz.3	MANEAL	Homo sapiens mannosidase, endo-alpha-like (MANEAL), transcript variant 2, mRNA. (from RefSeq NM_152496)
Z1687	-0.8413	NM_001099856	uc033fbu.1	IKBKG	Homo sapiens inhibitor of kappa light polypeptide gene enhancer in B-cells, kinase gamma (IKBKG), transcript variant 2, mRNA. (from RefSeq NM_001099856)
Z2319	-0.8402	NM_001122834	uc009xcx.3	HHAT	Homo sapiens hedgehog acyltransferase (HHAT), transcript variant 2, mRNA. (from RefSeq NM_001122834)
Z992	-0.8393	NM_000120	uc001hpl.4	EPHX1	Homo sapiens epoxide hydrolase 1, microsomal (xenobiotic) (EPHX1), transcript variant 1, mRNA. (from RefSeq NM_000120)
Z4955	-0.8379	NM_001387	uc003lon.2	DPYSL3	Homo sapiens dihydropyrimidinase-like 3 (DPYSL3), transcript variant 2, mRNA. (from RefSeq NM_001387)
Z1115	-0.8379	NM_001144058	uc001qgq.4	NTM	Homo sapiens neurotrimin (NTM), transcript variant 3, mRNA. (from RefSeq NM_001144058)
Z52	-0.8374	NM_198175	uc002ith.3	NME1	Homo sapiens NME/NM23 nucleoside diphosphate kinase 1 (NME1), transcript variant 1, mRNA. (from RefSeq NM_198175)
Z3440	-0.8367	NM_020660	uc001zis.3	GJD2	Homo sapiens gap junction protein, delta 2, 36kDa (GJD2), mRNA. (from RefSeq NM_020660)
Z1643	-0.8364	NM_001289067	uc009xuo.5	HELLS	Homo sapiens helicase, lymphoid-specific (HELLS), transcript variant 2, mRNA. (from RefSeq NM_001289067)
Z1654	-0.8337	NM_001080997	uc002mvi.5	RTBDN	Homo sapiens retbindin (RTBDN), transcript variant 1, mRNA. (from RefSeq NM_001080997)
Z4292	-0.8333	NM_207499	uc063oyu.1	PTCHD4	Homo sapiens patched domain containing 4 (PTCHD4), transcript variant 2, mRNA. (from RefSeq NM_207499)
Z2382	-0.8332	NM_000064	uc002mfm.4	C3	Homo sapiens complement component 3 (C3), mRNA. (from RefSeq NM_000064)
Z4821	-0.8306	NM_001287444	uc032nde.2	DCDC2C	Homo sapiens doublecortin domain containing 2C (DCDC2C), mRNA. (from RefSeq NM_001287444)
Z2883	-0.8303	NM_018338	uc003eae.3	CFAP44	Homo sapiens cilia and flagella associated protein 44 (CFAP44), transcript variant 2, mRNA. (from RefSeq NM_018338)
Z1595	-0.8292	NM_001007565	uc003duf.4	TFG	Homo sapiens TRK-fused gene (TFG), transcript variant 2, mRNA. (from RefSeq NM_001007565)
Z256	-0.829	NR_029886	uc002pcr.1	MIR330	Homo sapiens microRNA 330 (MIR330), microRNA. (from RefSeq NR_029886)
Z2366	-0.8288	NM_001166287	uc021svu.1	RGMA	Homo sapiens repulsive guidance molecule family member a (RGMA), transcript variant 3, mRNA. (from RefSeq NM_001166287)
Z5002	-0.8279	NM_000944	uc011cen.2	PPP3CA	Homo sapiens protein phosphatase 3, catalytic subunit, alpha isozyme (PPP3CA), transcript variant 1, mRNA. (from RefSeq NM_000944)
Z3232	-0.8275	NM_006843	uc001tvg.4	SDS	Homo sapiens serine dehydratase (SDS), mRNA. (from RefSeq NM_006843)
Z4326	-0.8271	NR_030373	uc021uyt.2	MIR643	Homo sapiens microRNA 643 (MIR643), microRNA. (from RefSeq NR_030373)
Z2305	-0.8265	NM_005243	uc003aet.4	EWSR1	Homo sapiens EWS RNA-binding protein 1 (EWSR1), transcript variant 2, mRNA. (from RefSeq NM_005243)
Z5000	-0.8261	NM_024419	uc002jvm.4	PGS1	Homo sapiens phosphatidylglycerophosphate synthase 1 (PGS1), transcript variant 1, mRNA. (from RefSeq NM_024419)
Z3801	-0.8254	NM_001252036	uc001siv.4	RAB5B	Homo sapiens RAB5B, member RAS oncogene family (RAB5B), transcript variant 2, mRNA. (from RefSeq NM_001252036)
Z1933	-0.823	NR_037424	uc010mqv.4	MIR3651	Homo sapiens microRNA 3651 (MIR3651), microRNA. (from RefSeq NR_037424)
Z2436	-0.8219	NM_057090	uc001ckv.4	ARTN	Homo sapiens artemin (ARTN), transcript variant 4, mRNA. (from RefSeq NM_057090)
Z1909	-0.8205	NM_012465	uc001kml.3	TLL2	Homo sapiens tolloid-like 2 (TLL2), mRNA. (from RefSeq NM_012465)
Z3172	0.8201	NR_102369	uc031rac.2	SNORD124	Homo sapiens small nucleolar RNA, C/D box 124 (SNORD124), small nucleolar RNA. (from RefSeq NR_102369)
Z2850	0.8216	NM_012360	uc010uwu.3	OR1F1	Homo sapiens olfactory receptor, family 1, subfamily F, member 1 (OR1F1), mRNA. (from RefSeq NM_012360)
Z3315	0.8217	NM_001301159	uc021szs.3	NHLRC4	Homo sapiens NHL repeat containing 4 (NHLRC4), transcript variant 1, mRNA. (from RefSeq NM_001301159)
Z988	0.8232	NM_001130055	uc011lkk.2	EEF1D	Homo sapiens eukaryotic translation elongation factor 1 delta (guanine nucleotide exchange protein) (EEF1D), transcript variant 5, mRNA. (from RefSeq NM_001130055)
Z4323	0.8237	NM_001136571	uc010abc.1	ZAR1L	Homo sapiens zygote arrest 1-like (ZAR1L), mRNA. (from RefSeq NM_001136571)
Z3090	0.8239	NM_153219	uc002qlk.2	ZNF524	Homo sapiens zinc finger protein 524 (ZNF524), mRNA. (from RefSeq NM_153219)
Z4344	0.8258	NM_012231	uc001avi.3	PRDM2	Homo sapiens PR domain containing 2, with ZNF domain (PRDM2), transcript variant 1, mRNA. (from RefSeq NM_012231)
Z4700	0.826	NM_001136509	uc010vfm.2	ZNF843	Homo sapiens zinc finger protein 843 (ZNF843), mRNA. (from RefSeq NM_001136509)
Z1239	0.8266	NM_001204268	uc021qqy.1	FXYD6	Homo sapiens FXYD6-FXYD2 readthrough (FXYD6-FXYD2), transcript variant 1, mRNA. (from RefSeq NM_001204268)
Z4893	0.8266	NM_001207069	uc021vus.2	BZW1	Homo sapiens basic leucine zipper and W2 domains 1 (BZW1), transcript variant 3, mRNA. (from RefSeq NM_001207069)
Z4915	0.8266	NM_001242628	uc003nas.2	GFOD1	Homo sapiens glucose-fructose oxidoreductase domain containing 1 (GFOD1), transcript variant 2, mRNA. (from RefSeq NM_001242628)
Z4927	0.8266	NM_001242795	uc002ekb.4	NUP93	Homo sapiens nucleoporin 93kDa (NUP93), transcript variant 2, mRNA. (from RefSeq NM_001242795)
Z4908	0.8266	NM_001243514	uc021piz.2	ESRRG	Homo sapiens estrogen-related receptor gamma (ESRRG), transcript variant 14, mRNA. (from RefSeq NM_001243514)
Z4936	0.8266	NM_001251962	uc021xgc.1	ARHGEF26	Homo sapiens Rho guanine nucleotide exchange factor (GEF) 26 (ARHGEF26), transcript variant 1, mRNA. (from RefSeq NM_001251962)
Z4431	0.8266	NM_001252641	uc002nsq.4	URI1	Homo sapiens URI1, prefoldin-like chaperone (URI1), transcript variant 3, mRNA. (from RefSeq NM_001252641)
Z4892	0.8266	NM_001261409	uc001dpz.5	BCAR3	Homo sapiens breast cancer anti-estrogen resistance 3 (BCAR3), transcript variant 3, mRNA. (from RefSeq NM_001261409)
Z4456	0.8266	NM_001271213	uc059ivj.1	SQRDL	Homo sapiens sulfide quinone reductase-like (yeast) (SQRDL), transcript variant 2, mRNA. (from RefSeq NM_001271213)
Z4942	0.8266	NM_001272012	uc001kye.5	ITPRIP	Homo sapiens inositol 1,4,5-trisphosphate receptor interacting protein (ITPRIP), transcript variant 2, mRNA. (from RefSeq NM_001272012)
Z4909	0.8266	NM_001277353	uc031shc.2	MGAT4D	Homo sapiens MGAT4 family, member D (MGAT4D), mRNA. (from RefSeq NM_001277353)
Z4911	0.8266	NM_001004484	uc011lvs.2	OR13D1	Homo sapiens olfactory receptor, family 13, subfamily D, member 1 (OR13D1), mRNA. (from RefSeq NM_001004484)
Z2790	0.8266	NM_001278224	uc057hak.1	FGGY	Homo sapiens FGGY carbohydrate kinase domain containing (FGGY), transcript variant 4, mRNA. (from RefSeq NM_001278224)
Z4454	0.8266	NM_001282630	uc010qaw.3	PFKFB3	Homo sapiens 6-phosphofructo-2-kinase/fructose-2,6-biphosphatase 3 (PFKFB3), transcript variant 3, mRNA. (from RefSeq NM_001282630)
Z4447	0.8266	NM_001283129	uc002zrg.4	TANGO2	Homo sapiens transport and golgi organization 2 homolog (Drosophila) (TANGO2), transcript variant 4, mRNA. (from RefSeq NM_001283129)
Z4906	0.8266	NM_001284271	uc003pql.5	ASCC3	Homo sapiens activating signal cointegrator 1 complex subunit 3 (ASCC3), transcript variant 3, mRNA. (from RefSeq NM_001284271)
Z4876	0.8266	NM_001284311	uc011jvs.4	ADAP1	Homo sapiens ArfGAP with dual PH domains 1 (ADAP1), transcript variant 5, mRNA. (from RefSeq NM_001284311)
Z4932	0.8266	NM_001286476	uc010gqj.4	C21orf58	Homo sapiens chromosome 21 open reading frame 58 (C21orf58), transcript variant 4, mRNA. (from RefSeq NM_001286476)
Z2786	0.8266	NM_001290226	uc021xzk.2	MAST4	Homo sapiens microtubule associated serine/threonine kinase family member 4 (MAST4), transcript variant 4, mRNA. (from RefSeq NM_001290226)
Z4438	0.8266	NM_001524	uc002hzc.1	HCRT	Homo sapiens hypocretin (orexin) neuropeptide precursor (HCRT), mRNA. (from RefSeq NM_001524)
Z4926	0.8266	NM_001006638	uc002jlk.4	RAB37	Homo sapiens RAB37, member RAS oncogene family (RAB37), transcript variant 2, mRNA. (from RefSeq NM_001006638)
Z4918	0.8266	NM_001872	uc001vaw.4	CPB2	Homo sapiens carboxypeptidase B2 (plasma) (CPB2), transcript variant 1, mRNA. (from RefSeq NM_001872)
Z4449	0.8266	NM_002378	uc002lyv.4	MATK	Homo sapiens megakaryocyte-associated tyrosine kinase (MATK), transcript variant 2, mRNA. (from RefSeq NM_002378)
Z4445	0.8266	NM_002413	uc003ihy.4	MGST2	Homo sapiens microsomal glutathione S-transferase 2 (MGST2), transcript variant 1, mRNA. (from RefSeq NM_002413)
Z4886	0.8266	NM_002550	uc002fvh.1	OR3A1	Homo sapiens olfactory receptor, family 3, subfamily A, member 1 (OR3A1), mRNA. (from RefSeq NM_002550)
Z4439	0.8266	NM_002600	uc001dco.4	PDE4B	Homo sapiens phosphodiesterase 4B, cAMP-specific (PDE4B), transcript variant a, mRNA. (from RefSeq NM_002600)
Z4461	0.8266	NM_002630	uc003ora.3	PGC	Homo sapiens progastricsin (pepsinogen C) (PGC), transcript variant 1, mRNA. (from RefSeq NM_002630)
Z2785	0.8266	NM_003063	uc001pjp.4	SLN	Homo sapiens sarcolipin (SLN), mRNA. (from RefSeq NM_003063)
Z4871	0.8266	NM_001008397	uc003jpq.3	GPX8	Homo sapiens glutathione peroxidase 8 (putative) (GPX8), transcript variant 1, mRNA. (from RefSeq NM_001008397)
Z4921	0.8266	NM_003360	uc003ibt.3	UGT8	Homo sapiens UDP glycosyltransferase 8 (UGT8), transcript variant 2, mRNA. (from RefSeq NM_003360)
Z2788	0.8266	NM_003735	uc003lkt.3	PCDHGA12	Homo sapiens protocadherin gamma subfamily A, 12 (PCDHGA12), transcript variant 1, mRNA. (from RefSeq NM_003735)
Z4896	0.8266	NM_005677	uc003bzx.3	COLQ	Homo sapiens collagen-like tail subunit (single strand of homotrimer) of asymmetric acetylcholinesterase (COLQ), transcript variant I, mRNA. (from RefSeq NM_005677)
Z4885	0.8266	NM_005803	uc003nrm.4	FLOT1	Homo sapiens flotillin 1 (FLOT1), mRNA. (from RefSeq NM_005803)
Z1074	0.8266	NM_000032	uc004dua.4	ALAS2	Homo sapiens 5'-aminolevulinate synthase 2 (ALAS2), transcript variant 1, mRNA. (from RefSeq NM_000032)
Z4901	0.8266	NM_005951	uc002ejw.3	MT1H	Homo sapiens metallothionein 1H (MT1H), mRNA. (from RefSeq NM_005951)
Z4889	0.8266	NM_014406	uc002zlp.2	CCT8L2	Homo sapiens chaperonin containing TCP1, subunit 8 (theta)-like 2 (CCT8L2), mRNA. (from RefSeq NM_014406)
Z2787	0.8266	NM_014443	uc003lqo.4	IL17B	Homo sapiens interleukin 17B (IL17B), mRNA. (from RefSeq NM_014443)
Z4894	0.8266	NM_001017361	uc003pgt.5	KHDC3L	Homo sapiens KH domain containing 3-like, subcortical maternal complex member (KHDC3L), mRNA. (from RefSeq NM_001017361)
Z4913	0.8266	NM_015381	uc003bio.6	FAM19A5	Homo sapiens family with sequence similarity 19 (chemokine (C-C motif)-like), member A5 (FAM19A5), transcript variant 2, mRNA. (from RefSeq NM_015381)
Z4939	0.8266	NM_000258	uc003cql.2	MYL3	Homo sapiens myosin, light chain 3, alkali; ventricular, skeletal, slow (MYL3), mRNA. (from RefSeq NM_000258)
Z4938	0.8266	NM_016563	uc002aoi.2	RASL12	Homo sapiens RAS-like, family 12 (RASL12), transcript variant 1, mRNA. (from RefSeq NM_016563)
Z4441	0.8266	NM_018216	uc001ajm.2	PANK4	Homo sapiens pantothenate kinase 4 (PANK4), mRNA. (from RefSeq NM_018216)
Z4435	0.8266	NM_018402	uc001stx.2	IL26	Homo sapiens interleukin 26 (IL26), mRNA. (from RefSeq NM_018402)
Z4903	0.8266	NM_019888	uc002xxb.2	MC3R	Homo sapiens melanocortin 3 receptor (MC3R), mRNA. (from RefSeq NM_019888)
Z4890	0.8266	NM_020661	uc001qur.3	AICDA	Homo sapiens activation-induced cytidine deaminase (AICDA), mRNA. (from RefSeq NM_020661)
Z4883	0.8266	NM_020994	uc004fmi.2	CTAG2	Homo sapiens cancer/testis antigen 2 (CTAG2), transcript variant 2, mRNA. (from RefSeq NM_020994)
Z4899	0.8266	NM_021193	uc010zev.2	HOXD12	Homo sapiens homeobox D12 (HOXD12), mRNA. (from RefSeq NM_021193)
Z4874	0.8266	NM_032089	uc011dax.3	PCDHGA9	Homo sapiens protocadherin gamma subfamily A, 9 (PCDHGA9), transcript variant 2, mRNA. (from RefSeq NM_032089)
Z4446	0.8266	NM_032373	uc001khi.5	PCGF5	Homo sapiens polycomb group ring finger 5 (PCGF5), transcript variant 1, mRNA. (from RefSeq NM_032373)
Z4462	0.8266	NM_001033677	uc001tyu.4	CABP1	Homo sapiens calcium binding protein 1 (CABP1), transcript variant 3, mRNA. (from RefSeq NM_001033677)
Z4941	0.8266	NM_032622	uc003haf.5	LNX1	Homo sapiens ligand of numb-protein X 1, E3 ubiquitin protein ligase (LNX1), transcript variant 2, mRNA. (from RefSeq NM_032622)
Z4428	0.8266	NM_052942	uc057iek.1	GBP5	Homo sapiens guanylate binding protein 5 (GBP5), transcript variant 1, mRNA. (from RefSeq NM_052942)
Z4429	0.8266	NM_053282	uc001gbz.2	SH2D1B	Homo sapiens SH2 domain containing 1B (SH2D1B), mRNA. (from RefSeq NM_053282)
Z4444	0.8266	NM_054107	uc011lyv.2	OR1J2	Homo sapiens olfactory receptor, family 1, subfamily J, member 2 (OR1J2), mRNA. (from RefSeq NM_054107)
Z4922	0.8266	NM_134427	uc004bhw.4	RGS3	Homo sapiens regulator of G-protein signaling 3 (RGS3), transcript variant 4, mRNA. (from RefSeq NM_134427)
Z2792	0.8266	NM_139248	uc003fpm.4	LIPH	Homo sapiens lipase, member H (LIPH), mRNA. (from RefSeq NM_139248)
Z4459	0.8266	NM_145013	uc001qeu.3	C11orf45	Homo sapiens chromosome 11 open reading frame 45 (C11orf45), transcript variant 2, mRNA. (from RefSeq NM_145013)
Z4434	0.8266	NM_148961	uc002vyv.3	OTOS	Homo sapiens otospiralin (OTOS), mRNA. (from RefSeq NM_148961)
Z4933	0.8266	NM_152321	uc001rco.4	ERP27	Homo sapiens endoplasmic reticulum protein 27 (ERP27), transcript variant 1, mRNA. (from RefSeq NM_152321)
Z4879	0.8266	NM_153235	uc063rxd.1	TXLNB	Homo sapiens taxilin beta (TXLNB), mRNA. (from RefSeq NM_153235)
Z4925	0.8266	NM_173826	uc003cnd.5	TCAIM	Homo sapiens T cell activation inhibitor, mitochondrial (TCAIM), transcript variant 1, mRNA. (from RefSeq NM_173826)
Z1241	0.8266	NM_174918	uc002mhh.2	MCEMP1	Homo sapiens mast cell-expressed membrane protein 1 (MCEMP1), mRNA. (from RefSeq NM_174918)
Z4902	0.8266	NM_175742	uc004fgh.3	MAGEA2	Homo sapiens melanoma antigen family A2 (MAGEA2), transcript variant 2, mRNA. (from RefSeq NM_175742)
Z4900	0.8266	NM_175861	uc001rjb.4	TMTC1	Homo sapiens transmembrane and tetratricopeptide repeat containing 1 (TMTC1), transcript variant 2, mRNA. (from RefSeq NM_175861)
Z2789	0.8266	NM_177457	uc033cbo.2	LYNX1	Homo sapiens Ly6/neurotoxin 1 (LYNX1), transcript variant 3, mRNA. (from RefSeq NM_177457)
Z4937	0.8266	NM_178457	uc002yan.4	ZNF831	Homo sapiens zinc finger protein 831 (ZNF831), mRNA. (from RefSeq NM_178457)
Z4931	0.8266	NM_198795	uc001lbg.1	TDRD1	Homo sapiens tudor domain containing 1 (TDRD1), mRNA. (from RefSeq NM_198795)
Z4872	0.8266	NM_199050	uc002yzv.4	C2CD2	Homo sapiens C2 calcium-dependent domain containing 2 (C2CD2), transcript variant 2, mRNA. (from RefSeq NM_199050)
Z4877	0.8266	NM_201552	uc003wya.4	FGL1	Homo sapiens fibrinogen-like 1 (FGL1), transcript variant 3, mRNA. (from RefSeq NM_201552)
Z4928	0.8266	NM_207122	uc001mxz.4	EXT2	Homo sapiens exostosin glycosyltransferase 2 (EXT2), transcript variant 2, mRNA. (from RefSeq NM_207122)
Z4934	0.8266	NM_207320	uc004dxu.1	OTUD6A	Homo sapiens OTU deubiquitinase 6A (OTUD6A), mRNA. (from RefSeq NM_207320)
Z4904	0.8266	NR_002735	uc004fah.1	SNORD61	Homo sapiens small nucleolar RNA, C/D box 61 (SNORD61), small nucleolar RNA. (from RefSeq NR_002735)
Z4916	0.8266	NR_026773	uc003sic.4	LINC01558	Homo sapiens long intergenic non-protein coding RNA 1558 (LINC01558), long non-coding RNA. (from RefSeq NR_026773)
Z4897	0.8266	NR_027433	uc061pmz.1	LINC01124	Homo sapiens long intergenic non-protein coding RNA 1124 (LINC01124), long non-coding RNA. (from RefSeq NR_027433)
Z4448	0.8266	NR_029506	uc004bdu.1	MIR32	Homo sapiens microRNA 32 (MIR32), microRNA. (from RefSeq NR_029506)
Z4912	0.8266	NR_029836	uc003ziu.2	MIR101-2	Homo sapiens microRNA 101-2 (MIR101-2), microRNA. (from RefSeq NR_029836)
Z4923	0.8266	NR_031691	uc021pgq.1	MIR1278	Homo sapiens microRNA 1278 (MIR1278), microRNA. (from RefSeq NR_031691)
Z4884	0.8266	NR_031719	uc021tkh.1	MIR1538	Homo sapiens microRNA 1538 (MIR1538), microRNA. (from RefSeq NR_031719)
Z4940	0.8266	NR_033387	uc057rfl.1	ADARB2-AS1	Homo sapiens ADARB2 antisense RNA 1 (ADARB2-AS1), long non-coding RNA. (from RefSeq NR_033387)
Z4929	0.8266	NR_033841	uc002waf.4	AC104809.4	Homo sapiens uncharacterized LOC200772 (LOC200772), long non-coding RNA. (from RefSeq NR_033841)
Z4458	0.8266	NR_033897	uc003wda.6	EPHA1-AS1	Homo sapiens EPHA1 antisense RNA 1 (EPHA1-AS1), long non-coding RNA. (from RefSeq NR_033897)
Z4907	0.8266	NR_036200	uc021udy.1	MIR4316	Homo sapiens microRNA 4316 (MIR4316), microRNA. (from RefSeq NR_036200)
Z1240	0.8266	NR_037405	uc031wcn.1	MIR3611	Homo sapiens microRNA 3611 (MIR3611), microRNA. (from RefSeq NR_037405)
Z4898	0.8266	NR_037474	uc021yhq.1	MIR3912	Homo sapiens microRNA 3912 (MIR3912), microRNA. (from RefSeq NR_037474)
Z4910	0.8266	NR_038425	uc001hch.1	LEMD1-AS1	Homo sapiens LEMD1 antisense RNA 1 (LEMD1-AS1), long non-coding RNA. (from RefSeq NR_038425)
Z4914	0.8266	NR_038835	uc003wne.3	MNX1-AS1	Homo sapiens MNX1 antisense RNA 1 (head to head) (MNX1-AS1), long non-coding RNA. (from RefSeq NR_038835)
Z4453	0.8266	NR_039649	uc032ryg.1	MIR4447	Homo sapiens microRNA 4447 (MIR4447), microRNA. (from RefSeq NR_039649)
Z4460	0.8266	NR_039700	uc021pmz.1	MIR4480	Homo sapiens microRNA 4480 (MIR4480), microRNA. (from RefSeq NR_039700)
Z4436	0.8266	NR_039799	uc021zyt.1	MIR4655	Homo sapiens microRNA 4655 (MIR4655), microRNA. (from RefSeq NR_039799)
Z4917	0.8266	NM_000415	uc001rev.4	IAPP	Homo sapiens islet amyloid polypeptide (IAPP), mRNA. (from RefSeq NM_000415)
Z4887	0.8266	NR_040020	uc021uco.2	AC125421.1	Homo sapiens uncharacterized LOC400620 (LOC400620), long non-coding RNA. (from RefSeq NR_040020)
Z2791	0.8266	NR_045262	uc022bbd.1	PCAT1	Homo sapiens prostate cancer associated transcript 1 (non-protein coding) (PCAT1), long non-coding RNA. (from RefSeq NR_045262)
Z4440	0.8266	NR_046390	uc031scg.2	NAALADL2-AS3	Homo sapiens NAALADL2 antisense RNA 3 (NAALADL2-AS3), long non-coding RNA. (from RefSeq NR_046390)
Z4451	0.8266	NR_103442	uc063dcd.1	GDNF-AS1	Homo sapiens GDNF antisense RNA 1 (head to head) (GDNF-AS1), transcript variant GDNFOS, non-coding RNA. (from RefSeq NR_103442)
Z4442	0.8266	NR_103846	uc032aov.2	LINC00676	Homo sapiens long intergenic non-protein coding RNA 676 (LINC00676), long non-coding RNA. (from RefSeq NR_103846)
Z4924	0.8266	NR_104176	uc002obw.3	LINC01529	Homo sapiens long intergenic non-protein coding RNA 1529 (LINC01529), long non-coding RNA. (from RefSeq NR_104176)
Z4895	0.8266	NR_106814	uc031yhp.1	MIR6756	Homo sapiens microRNA 6756 (MIR6756), microRNA. (from RefSeq NR_106814)
Z4455	0.8266	NR_106937	uc033djv.1	MIR6877	Homo sapiens microRNA 6877 (MIR6877), microRNA. (from RefSeq NR_106937)
Z4437	0.8266	NR_106941	uc032cjj.1	MIR6881	Homo sapiens microRNA 6881 (MIR6881), microRNA. (from RefSeq NR_106941)
Z1076	0.8266	NR_107008	uc032egf.1	MIR7854	Homo sapiens microRNA 7854 (MIR7854), microRNA. (from RefSeq NR_107008)
Z4443	0.8266	NR_109999	uc032bhh.1	RP11-299L17.3	Homo sapiens uncharacterized LOC100506700 (LOC100506700), long non-coding RNA. (from RefSeq NR_109999)
Z4919	0.8266	NR_110750	uc060xfv.1	AC002115.5	Homo sapiens uncharacterized LOC102723617 (LOC102723617), long non-coding RNA. (from RefSeq NR_110750)
Z4905	0.8266	NR_110751	uc060hpf.1	RP11-1018N14.1	Homo sapiens uncharacterized LOC101927274 (LOC101927274), long non-coding RNA. (from RefSeq NR_110751)
Z4935	0.8266	NR_110870	uc063sys.1	RP11-503C24.4	Homo sapiens uncharacterized LOC101929420 (LOC101929420), long non-coding RNA. (from RefSeq NR_110870)
Z4880	0.8266	NR_111943	uc059mnm.1	RPS17	Homo sapiens ribosomal protein S17 (RPS17), transcript variant 2, non-coding RNA. (from RefSeq NR_111943)
Z4882	0.8266	NR_119378	uc059ufb.1	RP11-44F14.2	Homo sapiens uncharacterized LOC102723373 (LOC102723373), long non-coding RNA. (from RefSeq NR_119378)
Z4930	0.8266	NR_125716	uc001goh.2	OVAAL	Homo sapiens ovarian adenocarcinoma amplified long non-coding RNA (OVAAL), long non-coding RNA. (from RefSeq NR_125716)
Z4881	0.8266	NR_125817	uc064lra.1	RP11-94H18.1	Homo sapiens uncharacterized LOC101929470 (LOC101929470), long non-coding RNA. (from RefSeq NR_125817)
Z4432	0.8266	NR_126348	uc064pvx.1	LINC01151	Homo sapiens long intergenic non-protein coding RNA 1151 (LINC01151), long non-coding RNA. (from RefSeq NR_126348)
Z1075	0.8266	NM_001112706	uc003ssn.5	SCIN	Homo sapiens scinderin (SCIN), transcript variant 1, mRNA. (from RefSeq NM_001112706)
Z4433	0.8266	NM_000589	uc003kxk.3	IL4	Homo sapiens interleukin 4 (IL4), transcript variant 1, mRNA. (from RefSeq NM_000589)
Z4888	0.8266	NM_001142504	uc004dxc.5	STARD8	Homo sapiens StAR-related lipid transfer (START) domain containing 8 (STARD8), transcript variant 3, mRNA. (from RefSeq NM_001142504)
Z4891	0.8266	NM_000717	uc002iym.5	CA4	Homo sapiens carbonic anhydrase IV (CA4), mRNA. (from RefSeq NM_000717)
Z1238	0.8266	NM_001145194	uc010wzc.2	C18orf42	Homo sapiens chromosome 18 open reading frame 42 (C18orf42), mRNA. (from RefSeq NM_001145194)
Z2784	0.8266	NM_001145350	uc010zvf.1	C20orf173	Homo sapiens chromosome 20 open reading frame 173 (C20orf173), transcript variant 1, mRNA. (from RefSeq NM_001145350)
Z4450	0.8266	NM_001145512	uc010oos.3	NFIA	Homo sapiens nuclear factor I/A (NFIA), transcript variant 4, mRNA. (from RefSeq NM_001145512)
Z4875	0.8266	NM_001146016	uc003ovd.2	TJAP1	Homo sapiens tight junction associated protein 1 (peripheral) (TJAP1), transcript variant 1, mRNA. (from RefSeq NM_001146016)
Z4873	0.8266	NM_001166246	uc009xwc.3	HPSE2	Homo sapiens heparanase 2 (inactive) (HPSE2), transcript variant 4, mRNA. (from RefSeq NM_001166246)
Z4430	0.8266	NM_001168411	uc011dyg.3	RIMS1	Homo sapiens regulating synaptic membrane exocytosis 1 (RIMS1), transcript variant 6, mRNA. (from RefSeq NM_001168411)
Z4878	0.8266	NM_001170798	uc021qvs.1	SLC15A5	Homo sapiens solute carrier family 15, member 5 (SLC15A5), mRNA. (from RefSeq NM_001170798)
Z4920	0.8266	NM_001195129	uc021vyh.2	PRSS56	Homo sapiens protease, serine, 56 (PRSS56), mRNA. (from RefSeq NM_001195129)
Z4457	0.8266	NM_001001851	uc001ijr.2	ITIH5	Homo sapiens inter-alpha-trypsin inhibitor heavy chain family, member 5 (ITIH5), transcript variant 3, mRNA. (from RefSeq NM_001001851)
Z4452	0.8266	NM_001199973	uc065ahc.1	RPL36A-HNRNPH2	Homo sapiens RPL36A-HNRNPH2 readthrough (RPL36A-HNRNPH2), transcript variant 1, mRNA. (from RefSeq NM_001199973)
Z1303	0.8279	NR_046205	uc003xia.3	RBPMS-AS1	Homo sapiens RBPMS antisense RNA 1 (RBPMS-AS1), long non-coding RNA. (from RefSeq NR_046205)
Z681	0.8284	NR_038332	uc002oss.4	CTC-378H22.1	Homo sapiens uncharacterized LOC100505622 (LOC100505622), long non-coding RNA. (from RefSeq NR_038332)
Z3928	0.8304	NM_174905	uc002oin.2	FAM98C	Homo sapiens family with sequence similarity 98, member C (FAM98C), mRNA. (from RefSeq NM_174905)
Z2702	0.8313	NM_001004316	uc021xgh.1	LEKR1	Homo sapiens leucine, glutamate and lysine rich 1 (LEKR1), transcript variant 1, mRNA. (from RefSeq NM_001004316)
Z3672	0.832	NM_175907	uc002llx.4	ZADH2	Homo sapiens zinc binding alcohol dehydrogenase domain containing 2 (ZADH2), transcript variant 1, mRNA. (from RefSeq NM_175907)
Z2288	0.8326	NR_002598	uc064nkw.1	SNORD87	Homo sapiens small nucleolar RNA, C/D box 87 (SNORD87), small nucleolar RNA. (from RefSeq NR_002598)
Z698	0.8338	NR_039741	uc021taq.1	MIR4516	Homo sapiens microRNA 4516 (MIR4516), microRNA. (from RefSeq NR_039741)
Z4676	0.8342	NM_020378	uc002qle.3	NAT14	Homo sapiens N-acetyltransferase 14 (GCN5-related, putative) (NAT14), mRNA. (from RefSeq NM_020378)
Z2930	0.8351	NM_001080434	uc002pjk.3	LMTK3	Homo sapiens lemur tyrosine kinase 3 (LMTK3), mRNA. (from RefSeq NM_001080434)
Z3894	0.8352	NM_173564	uc003uvd.3	NYAP1	Homo sapiens neuronal tyrosine-phosphorylated phosphoinositide-3-kinase adaptor 1 (NYAP1), mRNA. (from RefSeq NM_173564)
Z4952	0.8366	NM_001294	uc002pai.5	CLPTM1	Homo sapiens cleft lip and palate associated transmembrane protein 1 (CLPTM1), transcript variant 2, mRNA. (from RefSeq NM_001294)
Z2949	0.8381	NM_152311	uc001lka.2	CLRN3	Homo sapiens clarin 3 (CLRN3), mRNA. (from RefSeq NM_152311)
Z815	0.8386	NM_001098579	uc010rcb.2	MRVI1	Homo sapiens murine retrovirus integration site 1 homolog (MRVI1), transcript variant 1, mRNA. (from RefSeq NM_001098579)
Z4398	0.8391	NR_047504	uc031zck.1	HOXC-AS1	Homo sapiens HOXC cluster antisense RNA 1 (HOXC-AS1), long non-coding RNA. (from RefSeq NR_047504)
Z3603	0.8394	NM_032587	uc003jmg.4	CARD6	Homo sapiens caspase recruitment domain family, member 6 (CARD6), mRNA. (from RefSeq NM_032587)
Z925	0.8404	NR_029702	uc010zog.2	MIR149	Homo sapiens microRNA 149 (MIR149), microRNA. (from RefSeq NR_029702)
Z3960	0.8421	NM_001042403	uc001teg.5	USP44	Homo sapiens ubiquitin specific peptidase 44 (USP44), transcript variant 2, mRNA. (from RefSeq NM_001042403)
Z3427	0.8458	NM_175575	uc002isv.5	WFIKKN2	Homo sapiens WAP, follistatin/kazal, immunoglobulin, kunitz and netrin domain containing 2 (WFIKKN2), mRNA. (from RefSeq NM_175575)
Z4610	0.8475	NM_001303444	uc002iii.2	HEXIM2	Homo sapiens hexamethylene bis-acetamide inducible 2 (HEXIM2), transcript variant 5, mRNA. (from RefSeq NM_001303444)
Z3828	0.8477	NR_027108	uc003mcp.6	CTB-33O18.3	Homo sapiens uncharacterized LOC285593 (LOC285593), transcript variant 1, long non-coding RNA. (from RefSeq NR_027108)
Z4943	0.8493	NM_000660	uc002oqh.4	TGFB1	Homo sapiens transforming growth factor, beta 1 (TGFB1), mRNA. (from RefSeq NM_000660)
Z466	0.85	NR_047550	uc031pyq.2	RP11-23F23.2	Homo sapiens uncharacterized LOC100506082 (LOC100506082), long non-coding RNA. (from RefSeq NR_047550)
Z2118	0.8506	NR_110943	uc002fkc.3	RP11-482M8.1	Homo sapiens uncharacterized LOC101928737 (LOC101928737), long non-coding RNA. (from RefSeq NR_110943)
Z471	0.8513	NM_001251935	uc009yll.3	NR1H3	Homo sapiens nuclear receptor subfamily 1, group H, member 3 (NR1H3), transcript variant 5, mRNA. (from RefSeq NM_001251935)
Z1359	0.8521	NM_020778	uc002ble.3	ALPK3	Homo sapiens alpha-kinase 3 (ALPK3), mRNA. (from RefSeq NM_020778)
Z3079	0.8527	NM_001271959	uc031pph.1	SLC39A1	Homo sapiens solute carrier family 39 (zinc transporter), member 1 (SLC39A1), transcript variant 4, mRNA. (from RefSeq NM_001271959)
Z3550	0.8529	NM_030613	uc003mjn.2	ZFP2	Homo sapiens ZFP2 zinc finger protein (ZFP2), mRNA. (from RefSeq NM_030613)
Z2689	0.8534	NM_001287749	uc011kxj.3	FDFT1	Homo sapiens farnesyl-diphosphate farnesyltransferase 1 (FDFT1), transcript variant 8, mRNA. (from RefSeq NM_001287749)
Z1268	0.8554	NR_110138	uc031wcr.1	LINC01452	Homo sapiens prostate cancer associated transcript 5 (non-protein coding) (PCAT5), long non-coding RNA. (from RefSeq NR_110138)
Z1430	0.8566	NM_001012977	uc004ebg.3	PABPC1L2A	Homo sapiens poly(A) binding protein, cytoplasmic 1-like 2A (PABPC1L2A), mRNA. (from RefSeq NM_001012977)
Z1428	0.8566	NM_032344	uc001nyp.6	NUDT22	Homo sapiens nudix (nucleoside diphosphate linked moiety X)-type motif 22 (NUDT22), transcript variant 1, mRNA. (from RefSeq NM_032344)
Z1429	0.8566	NR_030366	uc021udo.1	MIR636	Homo sapiens microRNA 636 (MIR636), microRNA. (from RefSeq NR_030366)
Z2552	0.857	NR_026674	uc010vos.2	FLJ30679	Homo sapiens uncharacterized protein FLJ30679 (FLJ30679), long non-coding RNA. (from RefSeq NR_026674)
Z2045	0.8579	NR_036207	uc021umr.1	MIR4321	Homo sapiens microRNA 4321 (MIR4321), microRNA. (from RefSeq NR_036207)
Z2933	0.8583	NM_001286704	uc032ack.2	UFM1	Homo sapiens ubiquitin-fold modifier 1 (UFM1), transcript variant 3, mRNA. (from RefSeq NM_001286704)
Z1217	0.86	NM_001287747	uc010lsb.5	FDFT1	Homo sapiens farnesyl-diphosphate farnesyltransferase 1 (FDFT1), transcript variant 6, mRNA. (from RefSeq NM_001287747)
Z1432	0.8615	NM_001199747	uc002ukn.3	HOXD8	Homo sapiens homeobox D8 (HOXD8), transcript variant 3, mRNA. (from RefSeq NM_001199747)
Z2729	0.8617	NR_015376	uc010qag.1	LINC00200	Homo sapiens long intergenic non-protein coding RNA 200 (LINC00200), long non-coding RNA. (from RefSeq NR_015376)
Z2734	0.8617	NR_106717	uc032qmw.1	MIR6069	Homo sapiens microRNA 6069 (MIR6069), microRNA. (from RefSeq NR_106717)
Z2733	0.8617	NR_106794	uc031utk.1	MIR6736	Homo sapiens microRNA 6736 (MIR6736), microRNA. (from RefSeq NR_106794)
Z2728	0.8617	NR_106880	uc032rkc.1	MIR6822	Homo sapiens microRNA 6822 (MIR6822), microRNA. (from RefSeq NR_106880)
Z2731	0.8617	NR_111906	uc061xsk.1	RP4-530I15.6	Homo sapiens uncharacterized LOC100506175 (LOC100506175), long non-coding RNA. (from RefSeq NR_111906)
Z2730	0.8617	NM_001144070	uc002isk.5	ABCC3	Homo sapiens ATP-binding cassette, sub-family C (CFTR/MRP), member 3 (ABCC3), transcript variant 2, mRNA. (from RefSeq NM_001144070)
Z2732	0.8617	NM_001001711	uc001phr.3	DDI1	Homo sapiens DNA-damage inducible 1 homolog 1 (S. cerevisiae) (DDI1), mRNA. (from RefSeq NM_001001711)
Z3100	0.863	NM_001002836	uc032igd.1	ZNF787	Homo sapiens zinc finger protein 787 (ZNF787), mRNA. (from RefSeq NM_001002836)
Z3313	0.8633	NM_025045	uc003auw.4	BAIAP2L2	Homo sapiens BAI1-associated protein 2-like 2 (BAIAP2L2), mRNA. (from RefSeq NM_025045)
Z1257	0.8634	NM_001297422	uc010sdu.2	RAD52	Homo sapiens RAD52 homolog (S. cerevisiae) (RAD52), transcript variant 5, mRNA. (from RefSeq NM_001297422)
Z1344	0.8634	NM_021620	uc003pqg.2	PRDM13	Homo sapiens PR domain containing 13 (PRDM13), mRNA. (from RefSeq NM_021620)
Z205	0.8637	NM_018891	uc001gpz.5	LAMC2	Homo sapiens laminin, gamma 2 (LAMC2), transcript variant 2, mRNA. (from RefSeq NM_018891)
Z747	0.8644	NR_038387	uc003fax.3	LINC00886	Homo sapiens long intergenic non-protein coding RNA 886 (LINC00886), long non-coding RNA. (from RefSeq NR_038387)
Z1155	0.8648	NM_174914	uc003jjz.3	UGT3A2	Homo sapiens UDP glycosyltransferase 3 family, polypeptide A2 (UGT3A2), transcript variant 1, mRNA. (from RefSeq NM_174914)
Z4176	0.8648	NR_024580	uc004cjg.1	CCDC183-AS1	Homo sapiens CCDC183 antisense RNA 1 (CCDC183-AS1), long non-coding RNA. (from RefSeq NR_024580)
Z1515	0.8653	NM_030766	uc001rae.4	BCL2L14	Homo sapiens BCL2-like 14 (apoptosis facilitator) (BCL2L14), transcript variant 2, mRNA. (from RefSeq NM_030766)
Z2609	0.8656	NM_001287136	uc010les.3	CDK14	Homo sapiens cyclin-dependent kinase 14 (CDK14), transcript variant 3, mRNA. (from RefSeq NM_001287136)
Z2603	0.8656	NM_022904	uc002nbe.3	RASAL3	Homo sapiens RAS protein activator like 3 (RASAL3), mRNA. (from RefSeq NM_022904)
Z2606	0.8656	NM_080588	uc001gxl.2	PTPN7	Homo sapiens protein tyrosine phosphatase, non-receptor type 7 (PTPN7), transcript variant 2, mRNA. (from RefSeq NM_080588)
Z2604	0.8656	NM_173833	uc003xgj.4	SCARA5	Homo sapiens scavenger receptor class A, member 5 (SCARA5), mRNA. (from RefSeq NM_173833)
Z2607	0.8656	NR_039919	uc021wrl.1	MIR4762	Homo sapiens microRNA 4762 (MIR4762), microRNA. (from RefSeq NR_039919)
Z2605	0.8656	NR_108085	uc031xse.2	OVOL1-AS1	Homo sapiens OVOL1 antisense RNA 1 (OVOL1-AS1), long non-coding RNA. (from RefSeq NR_108085)
Z2608	0.8656	NM_001102669	uc009ygq.4	RRAS2	Homo sapiens related RAS viral (r-ras) oncogene homolog 2 (RRAS2), transcript variant 2, mRNA. (from RefSeq NM_001102669)
Z1287	0.8662	NM_001008226	uc002bgv.4	FAM154B	Homo sapiens stabilizer of axonemal microtubules 2 (SAXO2), mRNA. (from RefSeq NM_001008226)
Z3611	0.8678	NM_003378	uc003uxx.5	VGF	Homo sapiens VGF nerve growth factor inducible (VGF), mRNA. (from RefSeq NM_003378)
Z3417	0.8687	NM_001286473	uc010atu.5	C14orf159	Homo sapiens chromosome 14 open reading frame 159 (C14orf159), transcript variant 9, mRNA. (from RefSeq NM_001286473)
Z4689	0.8692	NM_020372	uc001wjl.5	SLC22A17	Homo sapiens solute carrier family 22, member 17 (SLC22A17), transcript variant 1, mRNA. (from RefSeq NM_020372)
Z3442	0.8698	NM_001145118	uc011jwx.3	GRID2IP	Homo sapiens glutamate receptor, ionotropic, delta 2 (Grid2) interacting protein (GRID2IP), mRNA. (from RefSeq NM_001145118)
Z1689	0.8714	NM_001282707	uc010yjg.4	PDIA6	Homo sapiens protein disulfide isomerase family A, member 6 (PDIA6), transcript variant 5, mRNA. (from RefSeq NM_001282707)
Z907	0.8732	NR_036113	uc021pwn.1	MIR3157	Homo sapiens microRNA 3157 (MIR3157), microRNA. (from RefSeq NR_036113)
Z3845	0.8746	NM_000195	uc057vhd.1	HPS1	Homo sapiens Hermansky-Pudlak syndrome 1 (HPS1), transcript variant 1, mRNA. (from RefSeq NM_000195)
Z4706	0.8756	NM_005598	uc001fwa.3	NHLH1	Homo sapiens nescient helix loop helix 1 (NHLH1), mRNA. (from RefSeq NM_005598)
Z2868	0.8757	NM_005622	uc002dhr.4	ACSM3	Homo sapiens acyl-CoA synthetase medium-chain family member 3 (ACSM3), transcript variant 1, mRNA. (from RefSeq NM_005622)
Z163	0.8771	NM_018342	uc003ipx.4	TMEM144	Homo sapiens transmembrane protein 144 (TMEM144), mRNA. (from RefSeq NM_018342)
Z3155	0.8823	NM_001276378	uc003coy.3	LZTFL1	Homo sapiens leucine zipper transcription factor-like 1 (LZTFL1), transcript variant 2, mRNA. (from RefSeq NM_001276378)
Z3158	0.8823	NM_002638	uc002xng.4	PI3	Homo sapiens peptidase inhibitor 3, skin-derived (PI3), mRNA. (from RefSeq NM_002638)
Z3159	0.8823	NM_006202	uc002mom.3	PDE4A	Homo sapiens phosphodiesterase 4A, cAMP-specific (PDE4A), transcript variant 4, mRNA. (from RefSeq NM_006202)
Z3161	0.8823	NM_006418	uc001vhl.4	OLFM4	Homo sapiens olfactomedin 4 (OLFM4), mRNA. (from RefSeq NM_006418)
Z3160	0.8823	NM_018302	uc003gsy.5	C4orf19	Homo sapiens chromosome 4 open reading frame 19 (C4orf19), transcript variant 2, mRNA. (from RefSeq NM_018302)
Z3156	0.8823	NM_022659	uc003xes.3	EBF2	Homo sapiens early B-cell factor 2 (EBF2), mRNA. (from RefSeq NM_022659)
Z440	0.8823	NM_177528	uc002dqg.3	SULT1A2	Homo sapiens sulfotransferase family, cytosolic, 1A, phenol-preferring, member 2 (SULT1A2), transcript variant 2, mRNA. (from RefSeq NM_177528)
Z3157	0.8823	NR_024419	uc010wzm.1	RP11-789C17.3	Homo sapiens uncharacterized LOC100192426 (LOC100192426), long non-coding RNA. (from RefSeq NR_024419)
Z3153	0.8823	NR_104086	uc031uoz.1	RNVU1-19	Homo sapiens RNA, variant U1 small nuclear 19 (RNVU1-19), small nuclear RNA. (from RefSeq NR_104086)
Z3162	0.8823	NR_106884	uc032sbz.1	MIR6826	Homo sapiens microRNA 6826 (MIR6826), microRNA. (from RefSeq NR_106884)
Z3154	0.8823	NM_000798	uc003gmb.5	DRD5	Homo sapiens dopamine receptor D5 (DRD5), mRNA. (from RefSeq NM_000798)
Z3013	0.8855	NM_001278683	uc003eqf.4	AMOTL2	Homo sapiens angiomotin like 2 (AMOTL2), transcript variant 1, mRNA. (from RefSeq NM_001278683)
Z3014	0.8855	NM_001286175	uc010sir.4	C2CD5	Homo sapiens C2 calcium-dependent domain containing 5 (C2CD5), transcript variant 3, mRNA. (from RefSeq NM_001286175)
Z3016	0.8855	NM_001029883	uc002rmt.3	C2orf71	Homo sapiens chromosome 2 open reading frame 71 (C2orf71), mRNA. (from RefSeq NM_001029883)
Z3015	0.8855	NM_001168409	uc010kar.4	RIMS1	Homo sapiens regulating synaptic membrane exocytosis 1 (RIMS1), transcript variant 4, mRNA. (from RefSeq NM_001168409)
Z197	0.8865	NM_000037	uc003xoi.4	ANK1	Homo sapiens ankyrin 1, erythrocytic (ANK1), transcript variant 3, mRNA. (from RefSeq NM_000037)
Z1716	0.8872	NM_001145028	uc010xnk.2	PALM3	Homo sapiens paralemmin 3 (PALM3), mRNA. (from RefSeq NM_001145028)
Z1609	0.8933	NM_002479	uc001gzd.5	MYOG	Homo sapiens myogenin (myogenic factor 4) (MYOG), mRNA. (from RefSeq NM_002479)
Z1608	0.8933	NR_037449	uc021ucz.1	MIR3678	Homo sapiens microRNA 3678 (MIR3678), microRNA. (from RefSeq NR_037449)
Z1610	0.8933	NR_039699	uc031vxh.1	MIR548AK	Homo sapiens microRNA 548ak (MIR548AK), microRNA. (from RefSeq NR_039699)
Z1611	0.8933	NR_106831	uc032edj.1	MIR6773	Homo sapiens microRNA 6773 (MIR6773), microRNA. (from RefSeq NR_106831)
Z248	0.8934	NM_004265	uc001nsl.3	FADS2	Homo sapiens fatty acid desaturase 2 (FADS2), transcript variant 1, mRNA. (from RefSeq NM_004265)
Z4983	0.8938	NR_036137	uc021szr.1	MIR3176	Homo sapiens microRNA 3176 (MIR3176), microRNA. (from RefSeq NR_036137)
Z4006	0.8946	NM_001130487	uc002enm.4	NDRG4	Homo sapiens NDRG family member 4 (NDRG4), transcript variant 2, mRNA. (from RefSeq NM_001130487)
Z1705	0.8951	NM_001807	uc010naa.3	CEL	Homo sapiens carboxyl ester lipase (CEL), mRNA. (from RefSeq NM_001807)
Z2672	0.8964	NM_001178115	uc004fgx.4	ZNF185	Homo sapiens zinc finger protein 185 (LIM domain) (ZNF185), transcript variant 9, mRNA. (from RefSeq NM_001178115)
Z3632	0.9001	NM_001281719	uc032evq.2	UBB	Homo sapiens ubiquitin B (UBB), transcript variant 5, mRNA. (from RefSeq NM_001281719)
Z819	0.9013	NM_001136483	uc002ieg.4	C17orf105	Homo sapiens chromosome 17 open reading frame 105 (C17orf105), mRNA. (from RefSeq NM_001136483)
Z3790	0.9016	NM_017594	uc004aqx.2	DIRAS2	Homo sapiens DIRAS family, GTP-binding RAS-like 2 (DIRAS2), mRNA. (from RefSeq NM_017594)
Z3404	0.9026	NM_003660	uc002pmr.5	PPFIA3	Homo sapiens protein tyrosine phosphatase, receptor type, f polypeptide (PTPRF), interacting protein (liprin), alpha 3 (PPFIA3), transcript variant 1, mRNA. (from RefSeq NM_003660)
Z1970	0.9033	NM_001080471	uc001fqj.1	PEAR1	Homo sapiens platelet endothelial aggregation receptor 1 (PEAR1), mRNA. (from RefSeq NM_001080471)
Z1923	0.9066	NR_106959	uc032qmg.1	MIR7109	Homo sapiens microRNA 7109 (MIR7109), microRNA. (from RefSeq NR_106959)
Z1425	0.9078	NM_001165958	uc010cwj.4	GSDMB	Homo sapiens gasdermin B (GSDMB), transcript variant 3, mRNA. (from RefSeq NM_001165958)
Z2317	0.9084	NM_003512	uc003ngm.4	HIST1H2AC	Homo sapiens histone cluster 1, H2ac (HIST1H2AC), mRNA. (from RefSeq NM_003512)
Z778	0.9111	NM_001254758	uc021qry.2	ST3GAL4	Homo sapiens ST3 beta-galactoside alpha-2,3-sialyltransferase 4 (ST3GAL4), transcript variant 3, mRNA. (from RefSeq NM_001254758)
Z2082	0.9124	NM_016239	uc060cbc.1	MYO15A	Homo sapiens myosin XVA (MYO15A), mRNA. (from RefSeq NM_016239)
Z2780	0.9135	NM_001142300	uc002vci.4	CCNYL1	Homo sapiens cyclin Y-like 1 (CCNYL1), transcript variant 1, mRNA. (from RefSeq NM_001142300)
Z461	0.9143	NR_104343	uc002gtt.3	FLJ35934	Homo sapiens FLJ35934 (FLJ35934), long non-coding RNA. (from RefSeq NR_104343)
Z4653	0.9161	NR_125991	uc057inz.1	RP11-147C23.1	Homo sapiens uncharacterized LOC102723661 (LOC102723661), long non-coding RNA. (from RefSeq NR_125991)
Z1883	0.9173	NM_001170754	uc010oao.2	C1orf127	Homo sapiens chromosome 1 open reading frame 127 (C1orf127), mRNA. (from RefSeq NM_001170754)
Z905	0.9186	NM_172109	uc002yfc.2	KCNQ2	Homo sapiens potassium channel, voltage gated KQT-like subfamily Q, member 2 (KCNQ2), transcript variant 5, mRNA. (from RefSeq NM_172109)
Z3789	0.9195	NM_203344	uc002onv.5	SERTAD3	Homo sapiens SERTA domain containing 3 (SERTAD3), transcript variant 2, mRNA. (from RefSeq NM_203344)
Z2098	0.9198	NM_014952	uc001zlu.2	BAHD1	Homo sapiens bromo adjacent homology domain containing 1 (BAHD1), transcript variant 1, mRNA. (from RefSeq NM_014952)
Z113	0.9207	NM_201649	uc001cll.5	SLC6A9	Homo sapiens solute carrier family 6 (neurotransmitter transporter, glycine), member 9 (SLC6A9), transcript variant 2, mRNA. (from RefSeq NM_201649)
Z3974	0.9215	NM_001076552	uc010gey.3	ACSS2	Homo sapiens acyl-CoA synthetase short-chain family member 2 (ACSS2), transcript variant 2, mRNA. (from RefSeq NM_001076552)
Z213	0.9216	NM_001003927	uc002hgl.4	EVI2A	Homo sapiens ecotropic viral integration site 2A (EVI2A), transcript variant 1, mRNA. (from RefSeq NM_001003927)
Z1980	0.927	NM_016381	uc062jhx.1	TREX1	Homo sapiens three prime repair exonuclease 1 (TREX1), transcript variant 1, mRNA. (from RefSeq NM_016381)
Z2154	0.9272	NM_001301267	uc002ejv.2	MT1G	Homo sapiens metallothionein 1G (MT1G), transcript variant 2, mRNA. (from RefSeq NM_001301267)
Z3331	0.9297	NM_001301171	uc010uen.3	SHF	Homo sapiens Src homology 2 domain containing F (SHF), transcript variant 5, mRNA. (from RefSeq NM_001301171)
Z243	0.9316	NM_021199	uc001zvv.4	SQRDL	Homo sapiens sulfide quinone reductase-like (yeast) (SQRDL), transcript variant 1, mRNA. (from RefSeq NM_021199)
Z4831	0.934	NM_001077494	uc001kvb.6	NFKB2	Homo sapiens nuclear factor of kappa light polypeptide gene enhancer in B-cells 2 (p49/p100) (NFKB2), transcript variant 1, mRNA. (from RefSeq NM_001077494)
Z974	0.9381	NM_006451	uc003job.4	PAIP1	Homo sapiens poly(A) binding protein interacting protein 1 (PAIP1), transcript variant 1, mRNA. (from RefSeq NM_006451)
Z4346	0.9412	NM_205853	uc003dga.5	MUSTN1	Homo sapiens musculoskeletal, embryonic nuclear protein 1 (MUSTN1), mRNA. (from RefSeq NM_205853)
Z90	0.9427	NM_001202559	uc059ckz.1	CHURC1-FNTB	Homo sapiens CHURC1-FNTB readthrough (CHURC1-FNTB), transcript variant 1, mRNA. (from RefSeq NM_001202559)
Z4302	0.9444	NM_138690	uc002lqo.2	GRIN3B	Homo sapiens glutamate receptor, ionotropic, N-methyl-D-aspartate 3B (GRIN3B), mRNA. (from RefSeq NM_138690)
Z4819	0.9456	NR_121579	uc004cfy.3	RP11-426A6.5	Homo sapiens uncharacterized LOC101928525 (LOC101928525), long non-coding RNA. (from RefSeq NR_121579)
Z1116	0.9468	NM_175617	uc002ejl.5	MT1E	Homo sapiens metallothionein 1E (MT1E), mRNA. (from RefSeq NM_175617)
Z565	0.951	NM_001142533	uc004bry.4	SH2D3C	Homo sapiens SH2 domain containing 3C (SH2D3C), transcript variant 5, mRNA. (from RefSeq NM_001142533)
Z352	0.9518	NM_016429	uc032flu.2	COPZ2	Homo sapiens coatomer protein complex, subunit zeta 2 (COPZ2), mRNA. (from RefSeq NM_016429)
Z2268	0.9529	NR_103717	uc031wvl.2	LINC01561	Homo sapiens long intergenic non-protein coding RNA 1561 (LINC01561), long non-coding RNA. (from RefSeq NR_103717)
Z3954	0.9558	NM_016564	uc001lrh.2	CEND1	Homo sapiens cell cycle exit and neuronal differentiation 1 (CEND1), mRNA. (from RefSeq NM_016564)
Z3622	0.9558	NM_001171948	uc021uqq.1	KXD1	Homo sapiens KxDL motif containing 1 (KXD1), transcript variant 1, mRNA. (from RefSeq NM_001171948)
Z3652	0.9664	NM_018973	uc001fhm.3	DPM3	Homo sapiens dolichyl-phosphate mannosyltransferase polypeptide 3 (DPM3), transcript variant 1, mRNA. (from RefSeq NM_018973)
Z3897	0.967	NM_002228	uc001cze.4	JUN	Homo sapiens jun proto-oncogene (JUN), mRNA. (from RefSeq NM_002228)
Z1215	0.9725	NM_024308	uc002hnd.4	DHRS11	Homo sapiens dehydrogenase/reductase (SDR family) member 11 (DHRS11), mRNA. (from RefSeq NM_024308)
Z3496	0.9726	NM_001004439	uc002ari.4	ITGA11	Homo sapiens integrin, alpha 11 (ITGA11), mRNA. (from RefSeq NM_001004439)
Z4960	0.9731	NM_001193612	uc002ixx.3	TUBD1	Homo sapiens tubulin, delta 1 (TUBD1), transcript variant 5, mRNA. (from RefSeq NM_001193612)
Z551	0.9768	NM_032387	uc002ibj.4	WNK4	Homo sapiens WNK lysine deficient protein kinase 4 (WNK4), mRNA. (from RefSeq NM_032387)
