# Supplementary material for: Antagonistic Interactions in Mitochondria ROS Signaling Responses to Manganese
Source: Antioxidants (Basel). 2023 Mar 25;12(4):804. doi: 10.3390/antiox12040804 (PMC10134992; doi:10.3390/antiox12040804)
Supplement: Supplementary file 1 [file antioxidants-12-00804-s001.zip › Table S6.xlsx]

## Sheet: Sheet1
Supplemental Table S6: Annotation of metabolic features associated with Community 2b (cellular thiols) at |r|>0.8 (P<0.05)
Annotations are from xMSannotator with 10 ppm tolerance using HMDB and KEGG database. Many of the common metabolites have been previously confirmed by coelution and MS/MS relative to authentic standards but are considered here as annotations because MS/MS of adduct forms have not been confirmed.
Features without annotations deemed useful by the authors are listed as "unknown".
ID	|r|	m/z	RT (sec)	Name	Formula	Adduct	Chemical_ID	Annotation Score
Y447	0.86	158.097	77.5	Methylsalsolinol	C11H15NO2	M+H-2H2O	HMDB03626	4
Y1367	-0.8739	335.074	204.1	Glycerophosphoinositol	C9H19O11P	M+H	HMDB11649	3
Y1333	-0.8984	325.321	36	Hexadecanol	C16H34O	M+2ACN+H	HMDB03424	4
Y121	-0.8593	112.956	284.3	Dichloroacetaldehyde	C2H2Cl2O	M+H	HMDB60357	3
Y1098	0.8457	271.227	513	Oxohexadecanoic acid	C16H30O3	M+H	HMDB10733	3
Y360	0.9351	147.629	261.6	Androstane	C19H32O2	M(C13)+2H[2+]	CE2209	4
Y661	-0.8353	189.022	241.2	Methylmercaptopurine	C6H6N4S	M+Na	HMDB60412	4
Y222	0.8661	127.087	91.7	Acetaldehyde	C2H4O	M+2ACN+H	HMDB00990	4
Y1419	-0.8575	348.07	262.7	Adenosine monophosphate	C10H14N5O7P	M+H	HMDB00045	3
Y491	0.8787	162.076	45.4	Aminoadipic acid	C6H11NO4	M+H	HMDB00510	3
Y619	-0.8347	183.037	251.4	Aminomalonic acid	C3H5NO4	M+ACN+Na	HMDB01147	4
Y1380	-0.8457	338.267	44.1	Arachidonate	C20H32O3	M+NH4	HMDB60102	4
Y635	-0.8266	185.63	282.8	Arginyl-leucine	C12H25N5O3	M+2ACN+2H	HMDB28713	4
Y286	-0.922	136.041	274.1	Aspartate	C4H7NO4	M(S34)+H[1+]	C00049	4
Y1822	-0.8994	485.283	165.3	Butyrylcarnitine	C11H21NO4	2M+Na	HMDB02013	4
Y959	-0.9392	240.95	193.2	Carboxyphosphonopyruvate	C4H5O7P	M+2Na-H	C17946	4
Y1046	-0.8426	257.075	91.2	Aconitic acid	C6H6O6	M+2ACN+H	HMDB00072	4
Y1701	0.8539	431.073	280.4	CMP-2-aminoethylphosphonate	C11H20N4O10P2	M+H	HMDB60067	3
Y839	-0.8372	217.637	43.4	CPA (16:0, 0:0)	C19H37O6P	M+ACN+2H	HMDB07003	4
Y287	-0.889	136.048	109.5	Creatinine	C4H7N3O	M+Na	HMDB00562	4
Y1241	-0.8428	303.048	199.4	Cysteinyl-histidine	C9H14N4O3S	M+2Na-H	HMDB28777	4
Y1480	-0.9326	360.829	233.5	DG (16:0, 24:1, 0:0)	C43H82O5	M+ACN+2H	HMDB07123	4
Y2498	-0.8976	820.673	94.4	DG (22:4, 24:0, 0:0)	C49H88O5	M+ACN+Na	HMDB07702	4
Y884	0.8557	225.11	492.2	Dihydrolipoamide	C8H17NOS2	M+NH4	HMDB00985	4
Y1073	-0.8323	264.04	321.5	Dimethylallylpyrophosphate	C5H12O7P2	M+NH4	HMDB01120	4
Y744	0.8264	201.185	548.7	Dodecanoic acid	C12H24O2	M+H	HMDB00638	3
Y2056	-0.9238	613.34	168.7	Dynorphin A	C53H85N17O14	M+ACN+2H	HMDB12934	4
Y2408	0.8898	786.48	102	Ganglioside GD3 (18:1, 24:1)	C76H135N3O29	M+H+NH4	HMDB04917	4
Y919	-0.8969	233.025	251.7	Glucaric acid	C6H10O8	M+Na	HMDB00663	4
Y1433	0.8689	351.987	219.8	Glutathioselenol; GSSeH	C10H17N3O6SSe	M+H-2H2O	C18871	4
Y545	-0.8461	170.989	140	Glyoxylic acid	C2H2O3	2M+Na	HMDB00119	4
Y956	-0.9133	240.232	46	Hexacosanoic acid	C26H52O2	M+2ACN+2H	HMDB02356	4
Y1141	-0.908	280.264	46	Hexadecenal	C16H30O	M+ACN+H	HMDB60482	4
Y1392	0.8661	341.003	370.1	Hexose bisphosphate	C6H14O12P2	M+H[1+]	C00354	4
Y219	0.8531	127.05	536	Imidazoleacetic acid	C5H6N2O2	M+H	HMDB02024	3
Y366	0.8423	148.04	544.6	Indole quinone	C8H5NO2	M+H[1+]	C05579	4
Y902	-0.8291	228.16	76.5	Isovalerylcarnitine	C12H23NO4	M+H-H2O	HMDB00688	4
Y551	0.8886	172.061	47.6	Itaconic acid	C5H6O4	M+ACN+H	HMDB02092	4
Y2716	-0.8512	972.716	88.2	Lactosylceramide (18:1, 18:0)	C48H91NO13	M+2ACN+H	HMDB11591	4
Y552	-0.912	172.086	78.7	Glutamyl-hydroxyproline	C10H16N2O6	M+2ACN+2H	HMDB11161	4
Y591	-0.84	177.99	140.9	Aspartyl phosphate	C4H8NO7P	M+H-2H2O	HMDB12250	4
Y963	0.8983	241.031	260.1	Cystine	C6H12N2O4S2	M+H	HMDB00192	3
Y802	0.8685	211.069	73.1	Glutamic acid	C5H9NO4	M+ACN+Na	HMDB00148	4
Y1139	0.9706	279.232	44.1	Linolenic acid	C18H30O2	M+H	HMDB01388	3
Y791	-0.8987	209.983	229.6	Methyl(propenylthio) selenide	C4H8SSe	M+ACN+H	HMDB30877	4
Y1470	0.9388	359.316	41.4	MG (18:0, 0:0, 0:0)	C21H42O4	M+H	HMDB11131	3
Y1673	0.8309	421.233	157	MG (20:5, 0:0, 0:0)	C23H36O4	M+2Na-H	HMDB11580	4
Y859	-0.8518	221.115	36.5	Acetylglucosaminylamine	C8H16N2O5	M+H	HMDB01104	3
Y371	0.8698	148.144	267	Acetylputrescine	C6H14N2O	M+NH4	HMDB02064	4
Y2603	-0.8463	877.439	334.3	Neuromedin C 1-8	C39H53N15O9	M+H[1+]	HMDB13019	4
Y675	-0.8659	190.994	94.1	Oxoglutaric acid	C5H6O5	M+2Na-H	HMDB00208	4
Y1576	0.8731	392.288	351.7	PA (18:0, 18:2)	C39H73O8P	M+2ACN+2H	HMDB07861	4
Y539	0.83	170.154	100.8	Palmitic acid	C16H32O2	M+2ACN+2H	HMDB00220	4
Y1216	-0.88	297.29	44.7	Palmitic amide	C16H33NO	M+ACN+H	HMDB12273	4
Y1445	0.9013	354.285	550.6	PC (14:0, 16:0)	C38H76NO7P	M+H+NH4	HMDB07895	4
Y2577	0.9087	858.59	118.3	PC (14:1, 24:1)	C46H88NO8P	M+2Na-H	HMDB07927	4
Y2270	0.8484	718.538	174.1	PC (16:1, 15:0)	C39H76NO8P	M+H	HMDB08000	3
Y1668	-0.9325	418.799	123.2	PC (16:1, 18:3)	C42H76NO8P	M+2ACN+2H	HMDB08007	4
Y2455	0.8904	807.566	179.8	PC (18:2, 15:0)	C41H78NO8P	M+ACN+Na	HMDB08132	4
Y2261	-0.8782	714.577	99.8	PE (18:0, 18:0)	C41H82NO7P	M+H-H2O	HMDB09016	4
Y2472	0.8655	812.528	119.9	PE (20:4, 22:6)	C47H74NO8P	M+H	HMDB09408	3
Y2319	0.8344	751.544	143	PG (16:0, 18:0)	C40H79O10P	M+H	HMDB10572	3
Y446	0.8393	157.994	229.8	Phosphoglycolic acid	C2H5O6P	M(C13)+H[1+]	C00988	4
Y1506	-0.8578	368.958	165.7	Phosphohydroxypyruvic acid	C3H5O7P	2M+H	HMDB01024	4
Y547	-0.8953	171.121	35.7	Menthene-thiol	C10H18S	M+H	HMDB38192	3
Y1907	-0.827	528.354	232.4	Prolyl-lysine	C11H21N3O3	2M+ACN+H	HMDB29022	4
Y846	-0.8414	218.139	99.9	Propionylcarnitine	C10H19NO4	M+H	HMDB00824	3
Y2536	-0.8818	842.592	91.6	PS (18:0, 20:0)	C44H86NO10P	M+Na	HMDB10164	4
Y383	-0.914	150.02	122.6	Quinolinic acid	C7H5NO4	M+H-H2O	HMDB00232	4
Y1108	-0.8528	273.04	325.9	Sedoheptulose phosphate	C7H15O10P	M+H-H2O	HMDB60509	4
Y648	-0.8993	187.062	208.5	S-Methylmethionine	C6H14NO2S	M+Na	HMDB38670	4
Y2579	-0.8876	859.465	281	Spinorphin	C45H64N8O10	M+H-H2O	HMDB59790	4
Y2653	-0.8277	918.757	175.6	TG (14:0, 20:2, 20:2)	C55H98O6	M+ACN+Na	HMDB42588	4
Y2363	-0.8495	766.697	347.6	TG (16:0, 14:0, 14:1)	C47H88O6	M+NH4	HMDB43834	4
Y1729	-0.8536	439.909	179	TG (16:0, 14:0, 22:1)	C55H104O6	M+H+NH4	HMDB43840	4
Y1825	-0.8886	487.964	176.9	TG (16:0, 24:0, 18:2)	C62H116O6	M+H+NH4	HMDB44010	4
Y610	-0.8599	181.93	99.5	Thiosulfate	HS2O3	M+HCOONa[1+]	C00320	4
Y2758	-0.9116	1003.27	117.2	Enoyl-OPC4-CoA	C35H54N7O18P3S	M+NH4	HMDB11120	4
Y234	-0.9227	130.041	196.2	Tyramine sulfate	C8H11NO4S	M+ACN+2H	HMDB06409	4
Y1437	-0.9255	352.246	51.7	Undecanoylcarnitine	C18H35NO4	M+Na	HMDB13321	4
Y202	0.8306	124.048	549.1	Urea	CH4N2O	M+ACN+Na	HMDB00294	4
Y1748	-0.8445	449.019	175.6	Unknown	Unknown	Unknown	Unknown	Unknown
Y1281	0.8449	312.946	160.7	Unknown	Unknown	Unknown	Unknown	Unknown
Y1914	-0.8792	530.768	117.7	Unknown	Unknown	Unknown	Unknown	Unknown
Y1780	0.8348	460.743	85.7	Unknown	Unknown	Unknown	Unknown	Unknown
Y2923	-0.8317	1271.58	456.6	Unknown	Unknown	Unknown	Unknown	Unknown
Y246	-0.8329	131.521	275.1	Unknown	Unknown	Unknown	Unknown	Unknown
Y1075	0.8381	264.145	270	Unknown	unknown	unknown	unknown	unknown
Y15	0.9028	88.9527	266.4	Unknown	Unknown	Unknown	Unknown	Unknown
Y54	-0.974	98.0137	270	Unknown	Unknown	Unknown	Unknown	Unknown
Y280	0.8544	135.102	474.8	Unknown	Unknown	Unknown	Unknown	Unknown
Y298	0.9345	138.525	251.3	Unknown	Unknown	Unknown	Unknown	Unknown
Y316	0.8374	142.959	317.1	Unknown	Unknown	Unknown	Unknown	Unknown
Y337	0.9413	145.017	259	Unknown	Unknown	Unknown	Unknown	Unknown
Y345	0.8714	145.939	127.3	Unknown	Unknown	Unknown	Unknown	Unknown
Y420	-0.8926	154.967	363.4	Unknown	Unknown	Unknown	Unknown	Unknown
Y430	-0.9648	155.521	293.5	Unknown	Unknown	Unknown	Unknown	Unknown
Y439	0.8793	157.009	241.9	Unknown	Unknown	Unknown	Unknown	Unknown
Y476	0.8508	160.969	176.6	Unknown	Unknown	Unknown	Unknown	Unknown
Y603	0.9371	179.064	494.1	Unknown	Unknown	Unknown	Unknown	Unknown
Y630	-0.9635	184.947	516.3	Unknown	Unknown	Unknown	Unknown	Unknown
Y644	0.8763	186.963	139.9	Unknown	Unknown	Unknown	Unknown	Unknown
Y824	-0.9109	214.253	137.6	Unknown	Unknown	Unknown	Unknown	Unknown
Y833	-0.9625	215.98	117.8	Unknown	Unknown	Unknown	Unknown	Unknown
Y837	0.8434	216.632	273.7	Unknown	Unknown	Unknown	Unknown	Unknown
Y877	-0.8952	224.129	245.6	Unknown	Unknown	Unknown	Unknown	Unknown
Y913	0.8778	230.943	161.4	Unknown	Unknown	Unknown	Unknown	Unknown
Y925	-0.9337	234.543	250.7	Unknown	Unknown	Unknown	Unknown	Unknown
Y944	-0.8614	238.968	117.4	Unknown	Unknown	Unknown	Unknown	Unknown
Y1005	-0.8637	248.553	294.1	Unknown	Unknown	Unknown	Unknown	Unknown
Y1023	-0.8871	252.778	288.8	Unknown	Unknown	Unknown	Unknown	Unknown
Y1142	0.8683	280.753	118.5	Unknown	Unknown	Unknown	Unknown	Unknown
Y1185	-0.8552	289.493	287.7	Unknown	Unknown	Unknown	Unknown	Unknown
Y1189	0.8745	290.782	119.4	Unknown	Unknown	Unknown	Unknown	Unknown
Y1199	-0.8821	292.873	165.7	Unknown	Unknown	Unknown	Unknown	Unknown
Y1208	-0.8561	294.866	153.3	Unknown	Unknown	Unknown	Unknown	Unknown
Y1262	-0.9352	308.858	220.5	Unknown	Unknown	Unknown	Unknown	Unknown
Y1290	-0.9692	314.342	75.9	Unknown	Unknown	Unknown	Unknown	Unknown
Y1409	0.9376	346.004	173	Unknown	Unknown	Unknown	Unknown	Unknown
Y1500	-0.8285	366.454	511.2	Unknown	Unknown	Unknown	Unknown	Unknown
Y1513	-0.9224	369.701	173.5	Unknown	Unknown	Unknown	Unknown	Unknown
Y1569	-0.9156	387.978	167.4	Unknown	Unknown	Unknown	Unknown	Unknown
Y1698	-0.9511	430.091	256.5	Unknown	Unknown	Unknown	Unknown	Unknown
Y1737	-0.9369	443.906	186	Unknown	Unknown	Unknown	Unknown	Unknown
Y1761	-0.8587	452.854	155.3	Unknown	Unknown	Unknown	Unknown	Unknown
Y1767	0.8211	454.749	117	Unknown	Unknown	Unknown	Unknown	Unknown
Y1773	-0.8221	456.745	175.4	Unknown	Unknown	Unknown	Unknown	Unknown
Y1839	-0.8735	494.839	175.1	Unknown	Unknown	Unknown	Unknown	Unknown
Y1874	0.8262	510.792	128.3	Unknown	Unknown	Unknown	Unknown	Unknown
Y1947	-0.9512	550.805	89.5	Unknown	Unknown	Unknown	Unknown	Unknown
Y1978	-0.9092	566.98	174	Unknown	Unknown	Unknown	Unknown	Unknown
Y2022	-0.9335	588.955	290.4	Unknown	Unknown	Unknown	Unknown	Unknown
Y2065	-0.8355	619.77	90.8	Unknown	Unknown	Unknown	Unknown	Unknown
Y2081	-0.8381	626.803	91.2	Unknown	Unknown	Unknown	Unknown	Unknown
Y2141	-0.8239	658.891	393.7	Unknown	Unknown	Unknown	Unknown	Unknown
Y2226	-0.8512	704.754	98.3	Unknown	Unknown	Unknown	Unknown	Unknown
Y2253	0.9173	713.223	343.8	Unknown	Unknown	Unknown	Unknown	Unknown
Y2262	-0.8215	714.795	175.7	Unknown	Unknown	Unknown	Unknown	Unknown
Y2277	0.8222	721.814	175.9	Unknown	Unknown	Unknown	Unknown	Unknown
Y2515	-0.8228	832.792	176.2	Unknown	Unknown	Unknown	Unknown	Unknown
Y2557	0.8308	853.314	176.5	Unknown	Unknown	Unknown	Unknown	Unknown
Y2681	-0.8827	944.755	87.9	Unknown	Unknown	Unknown	Unknown	Unknown
Y2858	-0.8228	1140.18	109.1	Unknown	Unknown	Unknown	Unknown	Unknown
Y1002	0.8447	247.986	179.8	Unknown	Unknown	Unknown	Unknown	Unknown
Y443	0.841	157.529	241.6	Unknown	Unknown	Unknown	Unknown	Unknown
Y600	0.8247	178.52	241.7	Unknown	Unknown	Unknown	Unknown	Unknown
Y745	-0.8852	201.434	292.8	Unknown	Unknown	Unknown	Unknown	Unknown
Y852	-0.8558	218.975	318.7	Unknown	Unknown	Unknown	Unknown	Unknown
Y954	-0.8566	240.181	99.5	Unknown	Unknown	Unknown	Unknown	Unknown
Y988	-0.8223	245.916	142.9	Unknown	Unknown	Unknown	Unknown	Unknown
Y1178	-0.8295	287.933	39	Unknown	Unknown	Unknown	Unknown	Unknown
Y1206	-0.8685	294.844	167.2	Unknown	Unknown	Unknown	Unknown	Unknown
Y1279	-0.8368	312.467	282.2	Unknown	Unknown	Unknown	Unknown	Unknown
Y1317	-0.8232	320.818	97.7	Unknown	Unknown	Unknown	Unknown	Unknown
Y1379	-0.8863	337.912	169	Unknown	Unknown	Unknown	Unknown	Unknown
Y1402	-0.8593	344.844	117.9	Unknown	Unknown	Unknown	Unknown	Unknown
Y1769	-0.8384	454.93	89	Unknown	Unknown	Unknown	Unknown	Unknown
Y1856	-0.8333	504.873	92.7	Unknown	Unknown	Unknown	Unknown	Unknown
Y2115	-0.8635	644.95	85.5	Unknown	Unknown	Unknown	Unknown	Unknown
Y2275	-0.8818	720.761	175.1	Unknown	Unknown	Unknown	Unknown	Unknown
Y2289	-0.8555	732.472	111.8	Unknown	Unknown	Unknown	Unknown	Unknown
Y2360	-0.8301	766.116	330.5	Unknown	Unknown	Unknown	Unknown	Unknown
Y2598	-0.821	873.331	176.6	Unknown	Unknown	Unknown	Unknown	Unknown
