# Supplementary material for: Antagonistic Interactions in Mitochondria ROS Signaling Responses to Manganese
Source: Antioxidants (Basel). 2023 Mar 25;12(4):804. doi: 10.3390/antiox12040804 (PMC10134992; doi:10.3390/antiox12040804)
Supplement: Supplementary file 1 [file antioxidants-12-00804-s001.zip › Table S7.xlsx]

## Sheet: Respiration_Genes
Supplemental Table S7: Genes associated with Community 3 (mtOCR-mitochondrial oxygen consumption rate) at |r|>0.8 (P<0.05)
note: Value of r below correlation threshold <0.8 is denoted as 0
ID	|r| bOCR	|r| pOCR	RefSeq ID	KEGG ID	Gene name	Gene_description
Z1775	-0.9837	-0.9324	NM_004188	uc004ccg.4	GFI1B	Homo sapiens growth factor independent 1B transcription repressor (GFI1B), transcript variant 1, mRNA. (from RefSeq NM_004188)
Z1777	-0.9837	-0.9324	NM_001097643	uc009zhs.2	TAS2R30	Homo sapiens taste receptor, type 2, member 30 (TAS2R30), mRNA. (from RefSeq NM_001097643)
Z1776	-0.9837	-0.9324	NM_001164442	uc021xzg.2	FAM159B	Homo sapiens family with sequence similarity 159, member B (FAM159B), mRNA. (from RefSeq NM_001164442)
Z540	-0.9835	-0.9331	NM_001300968	uc009wvq.2	CCDC181	Homo sapiens coiled-coil domain containing 181 (CCDC181), transcript variant 1, mRNA. (from RefSeq NM_001300968)
Z541	-0.9835	-0.9331	NM_003394	uc001rss.4	WNT10B	Homo sapiens wingless-type MMTV integration site family, member 10B (WNT10B), mRNA. (from RefSeq NM_003394)
Z1699	-0.9833	-0.9337	NM_024841	uc001mwp.4	PRR5L	Homo sapiens proline rich 5 like (PRR5L), transcript variant 2, mRNA. (from RefSeq NM_024841)
Z1698	-0.9833	-0.9337	NM_001080538	uc011kpr.3	AKR1B15	Homo sapiens aldo-keto reductase family 1, member B15 (AKR1B15), mRNA. (from RefSeq NM_001080538)
Z1700	-0.9833	-0.9337	NM_001142469	uc002ddp.4	C16orf45	Homo sapiens chromosome 16 open reading frame 45 (C16orf45), transcript variant 2, mRNA. (from RefSeq NM_001142469)
Z868	-0.982	-0.918	NM_000565	uc001fez.2	IL6R	Homo sapiens interleukin 6 receptor (IL6R), transcript variant 1, mRNA. (from RefSeq NM_000565)
Z206	-0.9818	-0.9174	NM_003546	uc003njz.4	HIST1H4L	Homo sapiens histone cluster 1, H4l (HIST1H4L), mRNA. (from RefSeq NM_003546)
Z799	-0.9797	-0.9119	NM_002661	uc002fgt.4	PLCG2	Homo sapiens phospholipase C, gamma 2 (phosphatidylinositol-specific) (PLCG2), mRNA. (from RefSeq NM_002661)
Z2497	-0.9777	-0.9385	NM_001003841	uc003jbw.5	SLC6A19	Homo sapiens solute carrier family 6 (neutral amino acid transporter), member 19 (SLC6A19), mRNA. (from RefSeq NM_001003841)
Z2498	-0.9777	-0.9385	NM_001005619	uc002jpj.4	ITGB4	Homo sapiens integrin, beta 4 (ITGB4), transcript variant 2, mRNA. (from RefSeq NM_001005619)
Z2499	-0.9777	-0.9385	NR_110225	uc002utn.2	AC020571.3	Homo sapiens uncharacterized LOC101927482 (LOC101927482), transcript variant 1, long non-coding RNA. (from RefSeq NR_110225)
Z2501	-0.9777	-0.9385	NR_110659	uc065aep.1	PABPC5-AS1	Homo sapiens PABPC5 antisense RNA 1 (PABPC5-AS1), long non-coding RNA. (from RefSeq NR_110659)
Z2500	-0.9777	-0.9385	NM_001105579	uc001xpx.2	SYNDIG1L	Homo sapiens synapse differentiation inducing 1-like (SYNDIG1L), mRNA. (from RefSeq NM_001105579)
Z2387	-0.9762	-0.9388	NM_015345	uc003oox.3	DAAM2	Homo sapiens dishevelled associated activator of morphogenesis 2 (DAAM2), transcript variant 2, mRNA. (from RefSeq NM_015345)
Z2389	-0.9762	-0.9388	NM_022144	uc004efy.5	TNMD	Homo sapiens tenomodulin (TNMD), mRNA. (from RefSeq NM_022144)
Z2392	-0.9762	-0.9388	NR_049856	uc032ocw.1	MIR5590	Homo sapiens microRNA 5590 (MIR5590), microRNA. (from RefSeq NR_049856)
Z2391	-0.9762	-0.9388	NM_000769	uc010qnz.3	CYP2C19	Homo sapiens cytochrome P450, family 2, subfamily C, polypeptide 19 (CYP2C19), mRNA. (from RefSeq NM_000769)
Z2388	-0.9762	-0.9388	NM_001185106	uc003dya.4	PLCXD2	Homo sapiens phosphatidylinositol-specific phospholipase C, X domain containing 2 (PLCXD2), transcript variant 1, mRNA. (from RefSeq NM_001185106)
Z2390	-0.9762	-0.9388	NM_001189	uc003gmx.3	NKX3-2	Homo sapiens NK3 homeobox 2 (NKX3-2), mRNA. (from RefSeq NM_001189)
Z4334	-0.9757	-0.9035	NM_002868	uc001siw.3	RAB5B	Homo sapiens RAB5B, member RAS oncogene family (RAB5B), transcript variant 1, mRNA. (from RefSeq NM_002868)
Z2661	-0.9754	-0.9389	NM_001288718	uc010cya.3	STAT5A	Homo sapiens signal transducer and activator of transcription 5A (STAT5A), transcript variant 1, mRNA. (from RefSeq NM_001288718)
Z2667	-0.9754	-0.9389	NM_001325	uc004egh.4	CSTF2	Homo sapiens cleavage stimulation factor, 3' pre-RNA, subunit 2, 64kDa (CSTF2), transcript variant 2, mRNA. (from RefSeq NM_001325)
Z2663	-0.9754	-0.9389	NM_001643	uc001fzc.2	APOA2	Homo sapiens apolipoprotein A-II (APOA2), mRNA. (from RefSeq NM_001643)
Z2666	-0.9754	-0.9389	NM_001710	uc003nyj.5	CFB	Homo sapiens complement factor B (CFB), mRNA. (from RefSeq NM_001710)
Z2662	-0.9754	-0.9389	NM_001008491	uc002wbc.5	SEPT2	Homo sapiens septin 2 (SEPT2), transcript variant 1, mRNA. (from RefSeq NM_001008491)
Z2668	-0.9754	-0.9389	NM_152706	uc003ujv.4	C7orf62	Homo sapiens chromosome 7 open reading frame 62 (C7orf62), mRNA. (from RefSeq NM_152706)
Z2660	-0.9754	-0.9389	NM_207440	uc001vsh.1	ATP11AUN	Homo sapiens ATP11A upstream neighbor (ATP11AUN), mRNA. (from RefSeq NM_207440)
Z2664	-0.9754	-0.9389	NM_001080391	uc002vqu.2	SP100	Homo sapiens SP100 nuclear antigen (SP100), transcript variant 1, mRNA. (from RefSeq NM_001080391)
Z2665	-0.9754	-0.9389	NR_125783	uc061gvk.1	MYCNUT	Homo sapiens MYCN upstream transcript (non-protein coding) (MYCNUT), long non-coding RNA. (from RefSeq NR_125783)
Z1004	-0.9742	-0.939	NM_014059	uc001uyi.3	RGCC	Homo sapiens regulator of cell cycle (RGCC), mRNA. (from RefSeq NM_014059)
Z1003	-0.9742	-0.939	NM_173563	uc003mvx.4	FAM217A	Homo sapiens family with sequence similarity 217, member A (FAM217A), mRNA. (from RefSeq NM_173563)
Z2521	-0.9738	-0.939	NM_001282704	uc002rav.4	PDIA6	Homo sapiens protein disulfide isomerase family A, member 6 (PDIA6), transcript variant 1, mRNA. (from RefSeq NM_001282704)
Z2522	-0.9738	-0.939	NM_001501	uc002whr.2	GNRH2	Homo sapiens gonadotropin-releasing hormone 2 (GNRH2), transcript variant 1, mRNA. (from RefSeq NM_001501)
Z229	-0.9738	-0.939	NM_006533	uc002opb.5	MIA	Homo sapiens melanoma inhibitory activity (MIA), transcript variant 1, mRNA. (from RefSeq NM_006533)
Z2524	-0.9738	-0.939	NM_006871	uc001wpb.4	RIPK3	Homo sapiens receptor-interacting serine-threonine kinase 3 (RIPK3), mRNA. (from RefSeq NM_006871)
Z2523	-0.9738	-0.939	NM_007084	uc001vma.4	SOX21	Homo sapiens SRY (sex determining region Y)-box 21 (SOX21), mRNA. (from RefSeq NM_007084)
Z270	-0.9664	-0.8863	NM_181482	uc002ksb.4	LDLRAD4	Homo sapiens low density lipoprotein receptor class A domain containing 4 (LDLRAD4), transcript variant a2, mRNA. (from RefSeq NM_181482)
Z2333	-0.9651	-0.8409	NM_001178111	uc002azl.3	SCAMP5	Homo sapiens secretory carrier membrane protein 5 (SCAMP5), transcript variant 1, mRNA. (from RefSeq NM_001178111)
Z1451	-0.959	-0.936	NM_001201553	uc010vmj.3	ZNF821	Homo sapiens zinc finger protein 821 (ZNF821), transcript variant 2, mRNA. (from RefSeq NM_001201553)
Z922	-0.9572	-0.9559	NM_001083913	uc001kwf.5	WBP1L	Homo sapiens WW domain binding protein 1-like (WBP1L), transcript variant 1, mRNA. (from RefSeq NM_001083913)
Z1548	-0.9549	-0.9345	NM_000186	uc001gtj.4	CFH	Homo sapiens complement factor H (CFH), transcript variant 1, mRNA. (from RefSeq NM_000186)
Z1550	-0.9549	-0.9345	NM_031409	uc003qvn.5	CCR6	Homo sapiens chemokine (C-C motif) receptor 6 (CCR6), transcript variant 2, mRNA. (from RefSeq NM_031409)
Z1549	-0.9549	-0.9345	NM_172005	uc002xpd.3	WFDC13	Homo sapiens WAP four-disulfide core domain 13 (WFDC13), mRNA. (from RefSeq NM_172005)
Z4358	-0.9544	-0.9879	NM_001427	uc003wmb.3	EN2	Homo sapiens engrailed homeobox 2 (EN2), mRNA. (from RefSeq NM_001427)
Z4092	-0.9544	-0.9561	NM_001142643	uc010wsc.4	CASKIN2	Homo sapiens CASK interacting protein 2 (CASKIN2), transcript variant 2, mRNA. (from RefSeq NM_001142643)
Z882	-0.9508	-0.9266	NM_001098169	uc010rzs.3	BSX	Homo sapiens brain-specific homeobox (BSX), mRNA. (from RefSeq NM_001098169)
Z3931	-0.9487	-0.9603	NM_014692	uc002cye.3	SEC14L5	Homo sapiens SEC14-like 5 (S. cerevisiae) (SEC14L5), mRNA. (from RefSeq NM_014692)
Z3543	-0.9436	0	NM_006223	uc004eam.4	PIN4	Homo sapiens peptidylprolyl cis/trans isomerase, NIMA-interacting 4 (PIN4), transcript variant 1, mRNA. (from RefSeq NM_006223)
Z3362	-0.9428	-0.8655	NM_001010867	uc001hsl.5	IBA57	Homo sapiens IBA57, iron-sulfur cluster assembly homolog (S. cerevisiae) (IBA57), mRNA. (from RefSeq NM_001010867)
Z4651	-0.9384	-0.8269	NM_001284526	uc002gkn.5	AURKB	Homo sapiens aurora kinase B (AURKB), transcript variant 3, mRNA. (from RefSeq NM_001284526)
Z721	-0.9344	-0.925	NM_015314	uc003tfb.3	KIAA0895	Homo sapiens KIAA0895 (KIAA0895), transcript variant 2, mRNA. (from RefSeq NM_015314)
Z722	-0.9344	-0.925	NM_176887	uc001qzp.1	TAS2R46	Homo sapiens taste receptor, type 2, member 46 (TAS2R46), mRNA. (from RefSeq NM_176887)
Z3241	-0.9318	-0.8227	NM_174911	uc003yrz.3	FAM84B	Homo sapiens family with sequence similarity 84, member B (FAM84B), mRNA. (from RefSeq NM_174911)
Z16	-0.9291	-0.9222	NM_000180	uc002gjt.3	GUCY2D	Homo sapiens guanylate cyclase 2D, membrane (retina-specific) (GUCY2D), mRNA. (from RefSeq NM_000180)
Z694	-0.9255	-0.9202	NM_001258397	uc031rba.2	CCDC103	Homo sapiens coiled-coil domain containing 103 (CCDC103), transcript variant 4, mRNA. (from RefSeq NM_001258397)
Z366	-0.9231	-0.9324	NR_030325	uc022aql.1	MIR595	Homo sapiens microRNA 595 (MIR595), microRNA. (from RefSeq NR_030325)
Z3150	-0.9226	-0.9237	NM_182898	uc003szq.3	CREB5	Homo sapiens cAMP responsive element binding protein 5 (CREB5), transcript variant 1, mRNA. (from RefSeq NM_182898)
Z2397	-0.9214	-0.9873	NM_032304	uc002cjo.2	HAGHL	Homo sapiens hydroxyacylglutathione hydrolase-like (HAGHL), transcript variant 2, mRNA. (from RefSeq NM_032304)
Z4417	-0.9209	-0.8403	NM_001267043	uc001reg.3	AEBP2	Homo sapiens AE binding protein 2 (AEBP2), transcript variant 3, mRNA. (from RefSeq NM_001267043)
Z3762	-0.9158	0	NM_001166425	uc011bdn.3	GNAI2	Homo sapiens guanine nucleotide binding protein (G protein), alpha inhibiting activity polypeptide 2 (GNAI2), transcript variant 2, mRNA. (from RefSeq NM_001166425)
Z2971	-0.9078	-0.9889	NR_002736	uc002cov.1	SNORD60	Homo sapiens small nucleolar RNA, C/D box 60 (SNORD60), small nucleolar RNA. (from RefSeq NR_002736)
Z4851	-0.9069	-0.8453	NM_032045	uc011akm.2	KREMEN1	Homo sapiens kringle containing transmembrane protein 1 (KREMEN1), transcript variant 2, mRNA. (from RefSeq NM_032045)
Z1827	-0.9064	-0.9083	NM_001130065	uc002nfi.3	MYO9B	Homo sapiens myosin IXB (MYO9B), transcript variant 2, mRNA. (from RefSeq NM_001130065)
Z1657	-0.9027	0	NR_126384	uc061kjz.1	LINC01143	Homo sapiens long intergenic non-protein coding RNA 1143 (LINC01143), long non-coding RNA. (from RefSeq NR_126384)
Z2590	-0.9017	-0.9116	NM_133375	uc002app.4	DIS3L	Homo sapiens DIS3 like exosome 3'-5' exoribonuclease (DIS3L), transcript variant 2, mRNA. (from RefSeq NM_133375)
Z3452	-0.8994	0	NM_001085400	uc010ifc.4	RELL1	Homo sapiens RELT-like 1 (RELL1), transcript variant 1, mRNA. (from RefSeq NM_001085400)
Z3553	-0.8974	-0.857	NR_033986	uc021ryj.2	LINC00642	Homo sapiens long intergenic non-protein coding RNA 642 (LINC00642), long non-coding RNA. (from RefSeq NR_033986)
Z2887	-0.8969	-0.8469	NM_205545	uc003ywz.4	LYPD2	Homo sapiens LY6/PLAUR domain containing 2 (LYPD2), mRNA. (from RefSeq NM_205545)
Z1258	-0.8966	0	NM_001018050	uc003bag.4	POLR3H	Homo sapiens polymerase (RNA) III (DNA directed) polypeptide H (22.9kD) (POLR3H), transcript variant 3, mRNA. (from RefSeq NM_001018050)
Z3664	-0.8932	-0.8516	NM_020436	uc002xwh.5	SALL4	Homo sapiens spalt-like transcription factor 4 (SALL4), mRNA. (from RefSeq NM_020436)
Z3631	-0.8907	0	NM_032999	uc003uau.5	GTF2I	Homo sapiens general transcription factor IIi (GTF2I), transcript variant 1, mRNA. (from RefSeq NM_032999)
Z678	-0.8892	-0.9163	NM_001254759	uc001qdw.4	ST3GAL4	Homo sapiens ST3 beta-galactoside alpha-2,3-sialyltransferase 4 (ST3GAL4), transcript variant 4, mRNA. (from RefSeq NM_001254759)
Z3424	-0.8885	0	NM_001166036	uc060xpg.1	ZNF260	Homo sapiens zinc finger protein 260 (ZNF260), transcript variant 2, mRNA. (from RefSeq NM_001166036)
Z53	-0.8841	-0.8855	NR_105015	uc032var.2	RASGRF2-AS1	Homo sapiens RASGRF2 antisense RNA 1 (RASGRF2-AS1), long non-coding RNA. (from RefSeq NR_105015)
Z5017	-0.8825	-0.8252	NM_001197240	uc011dkg.3	BTN2A2	Homo sapiens butyrophilin, subfamily 2, member A2 (BTN2A2), transcript variant 6, mRNA. (from RefSeq NM_001197240)
Z783	-0.8811	-0.9377	NM_153221	uc002nmv.4	CILP2	Homo sapiens cartilage intermediate layer protein 2 (CILP2), mRNA. (from RefSeq NM_153221)
Z1802	-0.8771	-0.8844	NM_153461	uc003bua.4	IL17RC	Homo sapiens interleukin 17 receptor C (IL17RC), transcript variant 2, mRNA. (from RefSeq NM_153461)
Z1803	-0.8771	-0.8844	NR_126379	uc063dol.1	LINC01033	Homo sapiens long intergenic non-protein coding RNA 1033 (LINC01033), long non-coding RNA. (from RefSeq NR_126379)
Z841	-0.8739	-0.9494	NM_001002857	uc002agk.4	ANXA2	Homo sapiens annexin A2 (ANXA2), transcript variant 2, mRNA. (from RefSeq NM_001002857)
Z843	-0.8729	-0.8614	NM_032321	uc002urs.3	C2orf88	Homo sapiens chromosome 2 open reading frame 88 (C2orf88), transcript variant 4, mRNA. (from RefSeq NM_032321)
Z2301	-0.8709	-0.8491	NM_078480	uc003yzs.5	PUF60	Homo sapiens poly-U binding splicing factor 60KDa (PUF60), transcript variant 1, mRNA. (from RefSeq NM_078480)
Z4667	-0.8692	-0.8205	NM_003392	uc003dhn.5	WNT5A	Homo sapiens wingless-type MMTV integration site family, member 5A (WNT5A), transcript variant 1, mRNA. (from RefSeq NM_003392)
Z1327	-0.8687	0	NM_001039091	uc004cva.4	PRPS2	Homo sapiens phosphoribosyl pyrophosphate synthetase 2 (PRPS2), transcript variant 1, mRNA. (from RefSeq NM_001039091)
Z1573	-0.8645	0	NM_003670	uc003bqf.4	BHLHE40	Homo sapiens basic helix-loop-helix family, member e40 (BHLHE40), mRNA. (from RefSeq NM_003670)
Z4226	-0.8637	0	NM_001242896	uc011alu.2	DEPDC5	Homo sapiens DEP domain containing 5 (DEPDC5), transcript variant 4, mRNA. (from RefSeq NM_001242896)
Z3846	-0.8631	0	NM_004657	uc002utb.4	SDPR	Homo sapiens serum deprivation response (SDPR), mRNA. (from RefSeq NM_004657)
Z1971	-0.8626	-0.9128	NM_001039958	uc002bon.4	MESP2	Homo sapiens mesoderm posterior basic helix-loop-helix transcription factor 2 (MESP2), mRNA. (from RefSeq NM_001039958)
Z3320	-0.8622	-0.9665	NM_001100418	uc002njv.5	C19orf60	Homo sapiens chromosome 19 open reading frame 60 (C19orf60), transcript variant 1, mRNA. (from RefSeq NM_001100418)
Z3689	-0.8609	0	NM_001145374	uc001tnx.3	ALKBH2	Homo sapiens alkB, alkylation repair homolog 2 (E. coli) (ALKBH2), transcript variant 1, mRNA. (from RefSeq NM_001145374)
Z3438	-0.8602	-0.8806	NM_145043	uc003wug.3	NEIL2	Homo sapiens nei endonuclease VIII-like 2 (E. coli) (NEIL2), transcript variant 1, mRNA. (from RefSeq NM_145043)
Z2972	-0.8577	0	NM_001256414	uc011kgt.2	GNAI1	Homo sapiens guanine nucleotide binding protein (G protein), alpha inhibiting activity polypeptide 1 (GNAI1), transcript variant 2, mRNA. (from RefSeq NM_001256414)
Z4147	-0.8549	0	NM_018056	uc010ogv.3	TMEM39B	Homo sapiens transmembrane protein 39B (TMEM39B), mRNA. (from RefSeq NM_018056)
Z2510	-0.8504	-0.9335	NM_001282882	uc033bvi.2	RIMS2	Homo sapiens regulating synaptic membrane exocytosis 2 (RIMS2), transcript variant 4, mRNA. (from RefSeq NM_001282882)
Z2349	-0.8497	-0.8731	NM_001136107	uc009wvv.2	METTL11B	Homo sapiens methyltransferase like 11B (METTL11B), mRNA. (from RefSeq NM_001136107)
Z2572	-0.8495	-0.9313	NM_022817	uc002vyc.4	PER2	Homo sapiens period circadian clock 2 (PER2), mRNA. (from RefSeq NM_022817)
Z2446	-0.848	-0.8703	NM_001017402	uc001hhg.4	LAMB3	Homo sapiens laminin, beta 3 (LAMB3), transcript variant 2, mRNA. (from RefSeq NM_001017402)
Z810	-0.847	-0.892	NM_152890	uc001dlj.4	COL24A1	Homo sapiens collagen, type XXIV, alpha 1 (COL24A1), mRNA. (from RefSeq NM_152890)
Z1740	-0.8457	0	NM_007019	uc002xpm.4	UBE2C	Homo sapiens ubiquitin-conjugating enzyme E2C (UBE2C), transcript variant 1, mRNA. (from RefSeq NM_007019)
Z3523	-0.844	-0.91	NM_182947	uc001spb.5	ARHGEF25	Homo sapiens Rho guanine nucleotide exchange factor (GEF) 25 (ARHGEF25), transcript variant 1, mRNA. (from RefSeq NM_182947)
Z1572	-0.8437	-0.8574	NM_001015878	uc002qoe.4	AURKC	Homo sapiens aurora kinase C (AURKC), transcript variant 1, mRNA. (from RefSeq NM_001015878)
Z2460	-0.8429	-0.8697	NR_110649	uc002eex.1	AC140542.2	Homo sapiens uncharacterized LOC100507534 (LOC100507534), long non-coding RNA. (from RefSeq NR_110649)
Z1353	-0.8427	0	NM_020785	uc062vgz.1	CC2D2A	Homo sapiens coiled-coil and C2 domain containing 2A (CC2D2A), transcript variant 2, mRNA. (from RefSeq NM_020785)
Z2555	-0.8412	-0.8669	NM_003736	uc003lkc.3	PCDHGB4	Homo sapiens protocadherin gamma subfamily B, 4 (PCDHGB4), transcript variant 1, mRNA. (from RefSeq NM_003736)
Z2556	-0.8412	-0.8669	NM_004885	uc003hgg.3	NPFFR2	Homo sapiens neuropeptide FF receptor 2 (NPFFR2), transcript variant 1, mRNA. (from RefSeq NM_004885)
Z2554	-0.8412	-0.8669	NM_001143943	uc010pyp.2	EFCAB2	Homo sapiens EF-hand calcium binding domain 2 (EFCAB2), transcript variant 2, mRNA. (from RefSeq NM_001143943)
Z758	-0.8397	0	NM_001144945	uc010wyv.3	MYL12B	Homo sapiens myosin, light chain 12B, regulatory (MYL12B), transcript variant 3, mRNA. (from RefSeq NM_001144945)
Z148	-0.8379	-0.8499	NM_001145664	uc010yvx.2	RFX8	Homo sapiens RFX family member 8, lacking RFX DNA binding domain (RFX8), mRNA. (from RefSeq NM_001145664)
Z2147	-0.8339	0	NM_004978	uc001dzh.4	KCNC4	Homo sapiens potassium channel, voltage gated Shaw related subfamily C, member 4 (KCNC4), transcript variant 1, mRNA. (from RefSeq NM_004978)
Z2931	-0.8333	0	NM_001105533	uc003vjs.5	CPED1	Homo sapiens cadherin-like and PC-esterase domain containing 1 (CPED1), transcript variant 2, mRNA. (from RefSeq NM_001105533)
Z4223	-0.8328	0	NR_031650	uc062rfa.1	MIR1248	Homo sapiens microRNA 1248 (MIR1248), microRNA. (from RefSeq NR_031650)
Z1397	-0.8266	-0.8651	NM_001042506	uc004ebf.4	PABPC1L2B	Homo sapiens poly(A) binding protein, cytoplasmic 1-like 2B (PABPC1L2B), mRNA. (from RefSeq NM_001042506)
Z2044	-0.8252	-0.9311	NM_001014831	uc002okj.2	PAK4	Homo sapiens p21 protein (Cdc42/Rac)-activated kinase 4 (PAK4), transcript variant 2, mRNA. (from RefSeq NM_001014831)
Z485	0.825	0	NM_080548	uc001qsa.1	PTPN6	Homo sapiens protein tyrosine phosphatase, non-receptor type 6 (PTPN6), transcript variant 2, mRNA. (from RefSeq NM_080548)
Z1763	0.8305	0	NM_001206878	uc021vwv.2	CTDSP1	Homo sapiens CTD (carboxy-terminal domain, RNA polymerase II, polypeptide A) small phosphatase 1 (CTDSP1), transcript variant 3, mRNA. (from RefSeq NM_001206878)
Z2841	0.8313	0	NM_198925	uc002boz.4	SEMA4B	Homo sapiens sema domain, immunoglobulin domain (Ig), transmembrane domain (TM) and short cytoplasmic domain, (semaphorin) 4B (SEMA4B), transcript variant 2, mRNA. (from RefSeq NM_198925)
Z1411	0.8313	0.8632	NM_001135213	uc001tpv.3	GIT2	Homo sapiens G protein-coupled receptor kinase interacting ArfGAP 2 (GIT2), transcript variant 6, mRNA. (from RefSeq NM_001135213)
Z3988	0.8318	0.8641	NR_110671	uc001den.3	DEPDC1-AS1	Homo sapiens DEPDC1 antisense RNA 1 (DEPDC1-AS1), long non-coding RNA. (from RefSeq NR_110671)
Z3908	0.8331	0	NM_021619	uc004bzt.2	PRDM12	Homo sapiens PR domain containing 12 (PRDM12), mRNA. (from RefSeq NM_021619)
Z1062	0.8348	0	NM_001288614	uc002wtm.5	CST3	Homo sapiens cystatin C (CST3), transcript variant 2, mRNA. (from RefSeq NM_001288614)
Z1921	0.835	0	NM_024867	uc003jjo.4	SPEF2	Homo sapiens sperm flagellar 2 (SPEF2), transcript variant 1, mRNA. (from RefSeq NM_024867)
Z3708	0.8368	0	NM_020366	uc001wag.4	RPGRIP1	Homo sapiens retinitis pigmentosa GTPase regulator interacting protein 1 (RPGRIP1), mRNA. (from RefSeq NM_020366)
Z4722	0.8374	0.9261	NR_110681	uc001hue.1	RP5-858B6.3	Homo sapiens uncharacterized LOC101927604 (LOC101927604), long non-coding RNA. (from RefSeq NR_110681)
Z738	0.8375	0	NR_031699	uc021vzv.1	MIR1292	Homo sapiens microRNA 1292 (MIR1292), microRNA. (from RefSeq NR_031699)
Z3050	0.8378	0	NM_006005	uc003gix.3	WFS1	Homo sapiens Wolfram syndrome 1 (wolframin) (WFS1), transcript variant 1, mRNA. (from RefSeq NM_006005)
Z5018	0.8386	0	NM_139314	uc002mjq.3	ANGPTL4	Homo sapiens angiopoietin-like 4 (ANGPTL4), transcript variant 1, mRNA. (from RefSeq NM_139314)
Z3800	0.8392	0	NM_024565	uc003lyb.2	CCNJL	Homo sapiens cyclin J-like (CCNJL), transcript variant 1, mRNA. (from RefSeq NM_024565)
Z3454	0.8414	0.8232	NM_006209	uc003yos.3	ENPP2	Homo sapiens ectonucleotide pyrophosphatase/phosphodiesterase 2 (ENPP2), transcript variant 1, mRNA. (from RefSeq NM_006209)
Z4165	0.8414	0	NM_173489	uc003jmj.5	MROH2B	Homo sapiens maestro heat-like repeat family member 2B (MROH2B), mRNA. (from RefSeq NM_173489)
Z3514	0.8417	0.8335	NM_014590	uc032zxc.2	ERVW-1	Homo sapiens endogenous retrovirus group W, member 1 (ERVW-1), transcript variant 1, mRNA. (from RefSeq NM_014590)
Z4737	0.8423	0	NM_002612	uc003uoa.4	PDK4	Homo sapiens pyruvate dehydrogenase kinase, isozyme 4 (PDK4), mRNA. (from RefSeq NM_002612)
Z4962	0.8426	0.9509	NM_001282532	uc032pml.2	ADNP	Homo sapiens activity-dependent neuroprotector homeobox (ADNP), transcript variant 4, mRNA. (from RefSeq NM_001282532)
Z4681	0.8461	0.8332	NM_173092	uc002jaz.1	KCNH6	Homo sapiens potassium channel, voltage gated eag related subfamily H, member 6 (KCNH6), transcript variant 2, mRNA. (from RefSeq NM_173092)
Z3773	0.8473	0	NM_001145065	uc003hsv.5	CCSER1	Homo sapiens coiled-coil serine-rich protein 1 (CCSER1), transcript variant 1, mRNA. (from RefSeq NM_001145065)
Z3579	0.8476	0.842	NR_046103	uc003vtp.1	AC009264.1	Homo sapiens uncharacterized LOC349160 (LOC349160), long non-coding RNA. (from RefSeq NR_046103)
Z4255	0.8659	0	NM_001373	uc001how.3	DNAH14	Homo sapiens dynein, axonemal, heavy chain 14 (DNAH14), transcript variant 1, mRNA. (from RefSeq NM_001373)
Z3967	0.8672	0	NR_033921	uc021ulh.1	RP11-638L3.1	Homo sapiens uncharacterized LOC643542 (LOC643542), long non-coding RNA. (from RefSeq NR_033921)
Z125	0.8714	0	NM_001017526	uc003bfj.3	ARHGAP8	Homo sapiens Rho GTPase activating protein 8 (ARHGAP8), transcript variant 1, mRNA. (from RefSeq NM_001017526)
Z4858	0.8717	0	NM_023011	uc001vup.4	UPF3A	Homo sapiens UPF3 regulator of nonsense transcripts homolog A (yeast) (UPF3A), transcript variant 1, mRNA. (from RefSeq NM_023011)
Z711	0.8738	0	NM_138574	uc003nds.4	HDGFL1	Homo sapiens hepatoma derived growth factor-like 1 (HDGFL1), mRNA. (from RefSeq NM_138574)
Z3403	0.882	0.9826	NR_110747	uc003hdc.1	RP11-584P21.2	Homo sapiens uncharacterized LOC101927237 (LOC101927237), long non-coding RNA. (from RefSeq NR_110747)
Z3276	0.8839	0	NR_029513	uc004dsr.2	MIR98	Homo sapiens microRNA 98 (MIR98), microRNA. (from RefSeq NR_029513)
Z3984	0.8886	0.8286	NM_001098670	uc009ypv.4	RASGRP2	Homo sapiens RAS guanyl releasing protein 2 (calcium and DAG-regulated) (RASGRP2), transcript variant 3, mRNA. (from RefSeq NM_001098670)
Z2995	0.8902	0	NR_037443	uc021ook.1	MIR3671	Homo sapiens microRNA 3671 (MIR3671), microRNA. (from RefSeq NR_037443)
Z3439	0.8908	0.8539	NR_030321	uc022afx.1	MIR590	Homo sapiens microRNA 590 (MIR590), microRNA. (from RefSeq NR_030321)
Z3098	0.8914	0.9669	NM_019083	uc001dsv.4	TRMT13	Homo sapiens tRNA methyltransferase 13 homolog (S. cerevisiae) (TRMT13), mRNA. (from RefSeq NM_019083)
Z921	0.8934	0	NR_004381	uc010dwy.1	SNORD105	Homo sapiens small nucleolar RNA, C/D box 105 (SNORD105), small nucleolar RNA. (from RefSeq NR_004381)
Z82	0.8942	0.956	NM_002060	uc001bya.3	GJA4	Homo sapiens gap junction protein, alpha 4, 37kDa (GJA4), mRNA. (from RefSeq NM_002060)
Z316	0.9055	0.8474	NM_001256045	uc011bmo.4	PIK3CB	Homo sapiens phosphatidylinositol-4,5-bisphosphate 3-kinase, catalytic subunit beta (PIK3CB), transcript variant 2, mRNA. (from RefSeq NM_001256045)
Z772	0.9058	0.8388	NM_015642	uc003ebn.5	ZBTB20	Homo sapiens zinc finger and BTB domain containing 20 (ZBTB20), transcript variant 2, mRNA. (from RefSeq NM_015642)
Z1786	0.906	0.8303	NM_001199165	uc002jfm.4	CEP112	Homo sapiens centrosomal protein 112kDa (CEP112), transcript variant 3, mRNA. (from RefSeq NM_001199165)
Z3813	0.9112	0	NM_020130	uc003xnq.3	C8orf4	Homo sapiens chromosome 8 open reading frame 4 (C8orf4), mRNA. (from RefSeq NM_020130)
Z4480	0.9122	0	NM_153343	uc003iwc.3	ENPP6	Homo sapiens ectonucleotide pyrophosphatase/phosphodiesterase 6 (ENPP6), mRNA. (from RefSeq NM_153343)
Z3089	0.9164	0.937	NR_110157	uc033aqw.1	AC006372.4	Homo sapiens uncharacterized LOC101927914 (LOC101927914), long non-coding RNA. (from RefSeq NR_110157)
Z3785	0.9166	0	NM_001166108	uc011cjx.3	PALLD	Homo sapiens palladin, cytoskeletal associated protein (PALLD), transcript variant 1, mRNA. (from RefSeq NM_001166108)
Z363	0.9175	0.9895	NR_026958	uc002xtt.3	LINC00494	Homo sapiens long intergenic non-protein coding RNA 494 (LINC00494), long non-coding RNA. (from RefSeq NR_026958)
Z2420	0.9198	0.9215	NM_001029858	uc003pxx.4	SLC35F1	Homo sapiens solute carrier family 35, member F1 (SLC35F1), mRNA. (from RefSeq NM_001029858)
Z257	0.9212	0.9885	NM_001243764	uc010pmv.3	RABGAP1L	Homo sapiens RAB GTPase activating protein 1-like (RABGAP1L), transcript variant 5, mRNA. (from RefSeq NM_001243764)
Z789	0.9217	0.9076	NM_001166160	uc010lfj.5	PPP1R9A	Homo sapiens protein phosphatase 1, regulatory subunit 9A (PPP1R9A), transcript variant 1, mRNA. (from RefSeq NM_001166160)
Z236	0.9244	0	NM_003364	uc003tol.5	UPP1	Homo sapiens uridine phosphorylase 1 (UPP1), transcript variant 1, mRNA. (from RefSeq NM_003364)
Z1753	0.9291	0.9112	NM_001199264	uc061xdp.1	SGK2	Homo sapiens serum/glucocorticoid regulated kinase 2 (SGK2), transcript variant 3, mRNA. (from RefSeq NM_001199264)
Z524	0.9302	0.857	NM_020313	uc002ell.2	CIAPIN1	Homo sapiens cytokine induced apoptosis inhibitor 1 (CIAPIN1), transcript variant 1, mRNA. (from RefSeq NM_020313)
Z320	0.9327	0.9848	NM_001105518	uc001grg.5	SWT1	Homo sapiens SWT1 RNA endoribonuclease homolog (S. cerevisiae) (SWT1), transcript variant 2, mRNA. (from RefSeq NM_001105518)
Z933	0.9329	0.8911	NR_109989	uc062ptu.1	RP11-368I23.2	Homo sapiens uncharacterized LOC100507661 (LOC100507661), long non-coding RNA. (from RefSeq NR_109989)
Z1437	0.9373	0.8879	NM_001173543	uc002fkr.3	BANP	Homo sapiens BTG3 associated nuclear protein (BANP), transcript variant 7, mRNA. (from RefSeq NM_001173543)
Z924	0.9379	0.8837	NR_040064	uc001gvd.1	LINC00862	Homo sapiens long intergenic non-protein coding RNA 862 (LINC00862), long non-coding RNA. (from RefSeq NR_040064)
Z1214	0.9419	0.9118	NM_001301860	uc002xjx.3	LPIN3	Homo sapiens lipin 3 (LPIN3), transcript variant 1, mRNA. (from RefSeq NM_001301860)
Z450	0.9436	0.9613	NR_024246	uc009zwt.1	LINC00934	Homo sapiens long intergenic non-protein coding RNA 934 (LINC00934), long non-coding RNA. (from RefSeq NR_024246)
Z3542	0.9436	0.8885	NR_110096	uc032cmn.2	SNHG21	Homo sapiens small nucleolar RNA host gene 21 (SNHG21), transcript variant 1, long non-coding RNA. (from RefSeq NR_110096)
Z193	0.9457	0.9074	NR_120569	uc058bdp.1	RP11-17G12.3	Homo sapiens uncharacterized LOC101928943 (LOC101928943), transcript variant 2, long non-coding RNA. (from RefSeq NR_120569)
Z1156	0.9461	0.9116	NM_198679	uc064wrm.1	RAPGEF1	Homo sapiens Rap guanine nucleotide exchange factor (GEF) 1 (RAPGEF1), transcript variant 2, mRNA. (from RefSeq NM_198679)
Z4386	0.9469	0	NM_001256270	uc010vdw.2	KIF22	Homo sapiens kinesin family member 22 (KIF22), transcript variant 3, mRNA. (from RefSeq NM_001256270)
Z3437	0.9489	0.8669	NM_022375	uc001gry.3	OCLM	Homo sapiens oculomedin (OCLM), mRNA. (from RefSeq NM_022375)
Z824	0.9495	0.925	NM_000260	uc001oyb.3	MYO7A	Homo sapiens myosin VIIA (MYO7A), transcript variant 1, mRNA. (from RefSeq NM_000260)
Z2761	0.95	0.8948	NM_152227	uc002wqd.5	SNX5	Homo sapiens sorting nexin 5 (SNX5), transcript variant 1, mRNA. (from RefSeq NM_152227)
Z1347	0.9524	0.9101	NM_001018100	uc002aei.4	MYZAP	Homo sapiens myocardial zonula adherens protein (MYZAP), transcript variant 1, mRNA. (from RefSeq NM_001018100)
Z1319	0.9556	0.9214	NM_015594	uc060dod.1	TBC1D29	Homo sapiens TBC1 domain family, member 29 (TBC1D29), mRNA. (from RefSeq NM_015594)
Z3648	0.9572	0.9235	NM_001204453	uc064grj.1	PSMC2	Homo sapiens proteasome (prosome, macropain) 26S subunit, ATPase, 2 (PSMC2), transcript variant 2, mRNA. (from RefSeq NM_001204453)
Z172	0.9572	0.823	NM_001282662	uc010gye.3	MKL1	Homo sapiens megakaryoblastic leukemia (translocation) 1 (MKL1), transcript variant 4, mRNA. (from RefSeq NM_001282662)
Z2911	0.9578	0.879	NM_000346	uc002jiw.4	SOX9	Homo sapiens SRY (sex determining region Y)-box 9 (SOX9), mRNA. (from RefSeq NM_000346)
Z1285	0.9597	0.9107	NM_020809	uc001pkz.3	ARHGAP20	Homo sapiens Rho GTPase activating protein 20 (ARHGAP20), transcript variant 1, mRNA. (from RefSeq NM_020809)
Z1864	0.9607	0.9116	NM_173208	uc002kly.5	TGIF1	Homo sapiens TGFB-induced factor homeobox 1 (TGIF1), transcript variant 3, mRNA. (from RefSeq NM_173208)
Z1874	0.9639	0.9427	NM_005323	uc003ngj.4	HIST1H1T	Homo sapiens histone cluster 1, H1t (HIST1H1T), mRNA. (from RefSeq NM_005323)
Z1119	0.9641	0.9342	NM_001129742	uc001kxg.4	CALHM3	Homo sapiens calcium homeostasis modulator 3 (CALHM3), mRNA. (from RefSeq NM_001129742)
Z80	0.9685	0.9606	NM_015430	uc031xjw.2	PAMR1	Homo sapiens peptidase domain containing associated with muscle regeneration 1 (PAMR1), transcript variant 1, mRNA. (from RefSeq NM_015430)
Z669	0.97	0.8642	NM_001135156	uc002ohn.3	DPF1	Homo sapiens D4, zinc and double PHD fingers family 1 (DPF1), transcript variant 3, mRNA. (from RefSeq NM_001135156)
Z1665	0.9722	0.9375	NM_004789	uc004boe.2	LHX2	Homo sapiens LIM homeobox 2 (LHX2), mRNA. (from RefSeq NM_004789)
Z1447	0.9733	0.9582	NM_052862	uc001gem.4	RCSD1	Homo sapiens RCSD domain containing 1 (RCSD1), mRNA. (from RefSeq NM_052862)
Z215	0.9743	0.862	NM_001942	uc002kwp.4	DSG1	Homo sapiens desmoglein 1 (DSG1), mRNA. (from RefSeq NM_001942)
Z4368	0.9779	0.9596	NR_029948	uc011bcb.1	MIR425	Homo sapiens microRNA 425 (MIR425), microRNA. (from RefSeq NR_029948)
Z950	0.9796	0.8889	NM_001159524	uc011kdn.3	ZNF735	Homo sapiens zinc finger protein 735 (ZNF735), mRNA. (from RefSeq NM_001159524)
Z2279	0.9824	0.9837	NM_145759	uc001hij.4	TRAF5	Homo sapiens TNF receptor-associated factor 5 (TRAF5), transcript variant 2, mRNA. (from RefSeq NM_145759)
Z2280	0.9824	0.9837	NR_038894	uc002yvf.3	CBR3-AS1	Homo sapiens CBR3 antisense RNA 1 (CBR3-AS1), transcript variant 3, long non-coding RNA. (from RefSeq NR_038894)
Z1187	0.9836	0.8936	NM_001171137	uc004bnu.4	STRBP	Homo sapiens spermatid perinuclear RNA binding protein (STRBP), transcript variant 2, mRNA. (from RefSeq NM_001171137)
Z2367	0.986	0.959	NR_029480	uc002yke.4	MIRLET7C	Homo sapiens microRNA let-7c (MIRLET7C), microRNA. (from RefSeq NR_029480)
Z2149	0.9866	0.9802	NM_001198845	uc009yrk.4	RBM14-RBM4	Homo sapiens RBM14-RBM4 readthrough (RBM14-RBM4), transcript variant 1, mRNA. (from RefSeq NM_001198845)
Z2454	0.9874	0.9605	NR_108060	uc031vyl.1	VIM-AS1	Homo sapiens VIM antisense RNA 1 (VIM-AS1), transcript variant 2, long non-coding RNA. (from RefSeq NR_108060)
Z2246	0.9903	0.9558	NM_023078	uc003yyy.3	PYCRL	Homo sapiens pyrroline-5-carboxylate reductase-like (PYCRL), mRNA. (from RefSeq NM_023078)
Z1181	0	-0.9458	NM_004946	uc003maf.3	DOCK2	Homo sapiens dedicator of cytokinesis 2 (DOCK2), mRNA. (from RefSeq NM_004946)
Z4095	0	-0.938	NM_001205293	uc009wxt.5	CACNA1E	Homo sapiens calcium channel, voltage-dependent, R type, alpha 1E subunit (CACNA1E), transcript variant 1, mRNA. (from RefSeq NM_001205293)
Z1279	0	-0.9218	NM_206876	uc002rmg.4	PPP1CB	Homo sapiens protein phosphatase 1, catalytic subunit, beta isozyme (PPP1CB), transcript variant 3, mRNA. (from RefSeq NM_206876)
Z3896	0	-0.9127	NM_032515	uc002wbq.4	BOK	Homo sapiens BCL2-related ovarian killer (BOK), mRNA. (from RefSeq NM_032515)
Z4370	0	-0.9118	NM_006383	uc002bdb.3	CIB2	Homo sapiens calcium and integrin binding family member 2 (CIB2), transcript variant 1, mRNA. (from RefSeq NM_006383)
Z3018	0	-0.9096	NM_000718	uc064xnz.1	CACNA1B	Homo sapiens calcium channel, voltage-dependent, N type, alpha 1B subunit (CACNA1B), transcript variant 1, mRNA. (from RefSeq NM_000718)
Z851	0	-0.9055	NR_049813	uc031sys.1	MIR5090	Homo sapiens microRNA 5090 (MIR5090), microRNA. (from RefSeq NR_049813)
Z4171	0	-0.901	NM_000902	uc003fab.2	MME	Homo sapiens membrane metallo-endopeptidase (MME), transcript variant 1, mRNA. (from RefSeq NM_000902)
Z1010	0	-0.8909	NM_001142317	uc010vmn.3	TXNL4B	Homo sapiens thioredoxin-like 4B (TXNL4B), transcript variant 2, mRNA. (from RefSeq NM_001142317)
Z3328	0	-0.8901	NM_207336	uc003wgd.3	ZNF467	Homo sapiens zinc finger protein 467 (ZNF467), mRNA. (from RefSeq NM_207336)
Z4972	0	-0.8896	NM_017526	uc001dcf.4	LEPROT	Homo sapiens leptin receptor overlapping transcript (LEPROT), transcript variant 1, mRNA. (from RefSeq NM_017526)
Z4672	0	-0.889	NM_031477	uc002dwl.3	YPEL3	Homo sapiens yippee-like 3 (Drosophila) (YPEL3), transcript variant 1, mRNA. (from RefSeq NM_031477)
Z3753	0	-0.8861	NR_036245	uc033abb.1	MIR4285	Homo sapiens microRNA 4285 (MIR4285), microRNA. (from RefSeq NR_036245)
Z4947	0	-0.8852	NM_138439	uc002csa.4	FLYWCH2	Homo sapiens FLYWCH family member 2 (FLYWCH2), transcript variant 1, mRNA. (from RefSeq NM_138439)
Z3498	0	-0.8823	NM_181536	uc059wxm.1	PKD1L3	Homo sapiens polycystic kidney disease 1-like 3 (PKD1L3), mRNA. (from RefSeq NM_181536)
Z2688	0	-0.8819	NM_020682	uc001kwk.4	AS3MT	Homo sapiens arsenite methyltransferase (AS3MT), mRNA. (from RefSeq NM_020682)
Z2938	0	-0.8815	NR_120363	uc059mjy.1	RP11-379K22.2	Homo sapiens uncharacterized LOC101929586 (LOC101929586), long non-coding RNA. (from RefSeq NR_120363)
Z3332	0	-0.8807	NM_001300773	uc058cdk.1	SYT7	Homo sapiens synaptotagmin VII (SYT7), transcript variant 3, mRNA. (from RefSeq NM_001300773)
Z3509	0	-0.8799	NM_178570	uc010rjt.4	RTN4RL2	Homo sapiens reticulon 4 receptor-like 2 (RTN4RL2), mRNA. (from RefSeq NM_178570)
Z2224	0	-0.8787	NM_001300959	uc003tlq.4	ZMIZ2	Homo sapiens zinc finger, MIZ-type containing 2 (ZMIZ2), transcript variant 3, mRNA. (from RefSeq NM_001300959)
Z3511	0	-0.8778	NM_007026	uc002hnx.3	DUSP14	Homo sapiens dual specificity phosphatase 14 (DUSP14), mRNA. (from RefSeq NM_007026)
Z3741	0	-0.8753	NM_006270	uc002pop.2	RRAS	Homo sapiens related RAS viral (r-ras) oncogene homolog (RRAS), mRNA. (from RefSeq NM_006270)
Z1450	0	-0.8742	NM_001164387	uc003kvo.3	RAPGEF6	Homo sapiens Rap guanine nucleotide exchange factor (GEF) 6 (RAPGEF6), transcript variant 3, mRNA. (from RefSeq NM_001164387)
Z4954	0	-0.8729	NR_030365	uc021ucf.1	MIR635	Homo sapiens microRNA 635 (MIR635), microRNA. (from RefSeq NR_030365)
Z486	0	-0.8704	NM_001164460	uc010kum.3	STEAP1B	Homo sapiens STEAP family member 1B (STEAP1B), transcript variant 1, mRNA. (from RefSeq NM_001164460)
Z2300	0	-0.8702	NM_001615	uc002sjw.4	ACTG2	Homo sapiens actin, gamma 2, smooth muscle, enteric (ACTG2), transcript variant 1, mRNA. (from RefSeq NM_001615)
Z3879	0	-0.8692	NM_001080524	uc002cvi.4	C16orf90	Homo sapiens chromosome 16 open reading frame 90 (C16orf90), mRNA. (from RefSeq NM_001080524)
Z3280	0	-0.866	NM_001197123	uc061bgp.1	IRF3	Homo sapiens interferon regulatory factor 3 (IRF3), transcript variant 3, mRNA. (from RefSeq NM_001197123)
Z4481	0	-0.8648	NM_001287237	uc022bcr.3	COMMD5	Homo sapiens COMM domain containing 5 (COMMD5), transcript variant 4, mRNA. (from RefSeq NM_001287237)
Z1666	0	-0.8634	NM_006634	uc002spu.2	VAMP5	Homo sapiens vesicle-associated membrane protein 5 (VAMP5), mRNA. (from RefSeq NM_006634)
Z5014	0	-0.8581	NM_172000	uc001gpe.3	TEDDM1	Homo sapiens transmembrane epididymal protein 1 (TEDDM1), mRNA. (from RefSeq NM_172000)
Z1086	0	-0.853	NM_003914	uc001uvr.5	CCNA1	Homo sapiens cyclin A1 (CCNA1), transcript variant 1, mRNA. (from RefSeq NM_003914)
Z1077	0	-0.8527	NM_152943	uc010tcg.3	ZNF268	Homo sapiens zinc finger protein 268 (ZNF268), transcript variant 3, mRNA. (from RefSeq NM_152943)
Z763	0	-0.8524	NM_001127464	uc002fku.2	ZNF469	Homo sapiens zinc finger protein 469 (ZNF469), mRNA. (from RefSeq NM_001127464)
Z2947	0	-0.8502	NM_000398	uc003bcz.4	CYB5R3	Homo sapiens cytochrome b5 reductase 3 (CYB5R3), transcript variant 1, mRNA. (from RefSeq NM_000398)
Z4822	0	-0.8471	NM_005224	uc002lql.4	ARID3A	Homo sapiens AT rich interactive domain 3A (BRIGHT-like) (ARID3A), mRNA. (from RefSeq NM_005224)
Z367	0	-0.8441	NM_001009568	uc001bpf.4	SMPDL3B	Homo sapiens sphingomyelin phosphodiesterase, acid-like 3B (SMPDL3B), transcript variant 2, mRNA. (from RefSeq NM_001009568)
Z2061	0	-0.8422	NM_022913	uc003jrh.5	GPBP1	Homo sapiens GC-rich promoter binding protein 1 (GPBP1), transcript variant 1, mRNA. (from RefSeq NM_022913)
Z2062	0	-0.8422	NM_138375	uc002kud.3	CABLES1	Homo sapiens Cdk5 and Abl enzyme substrate 1 (CABLES1), transcript variant 1, mRNA. (from RefSeq NM_138375)
Z2063	0	-0.8422	NM_138433	uc003bmi.3	KLHDC7B	Homo sapiens kelch domain containing 7B (KLHDC7B), mRNA. (from RefSeq NM_138433)
Z3001	0	-0.8405	NM_016539	uc002lzo.4	SIRT6	Homo sapiens sirtuin 6 (SIRT6), transcript variant 1, mRNA. (from RefSeq NM_016539)
Z2151	0	-0.8388	NM_170774	uc002wld.4	RASSF2	Homo sapiens Ras association (RalGDS/AF-6) domain family member 2 (RASSF2), transcript variant 2, mRNA. (from RefSeq NM_170774)
Z2150	0	-0.8388	NR_039814	uc022blz.1	MIR4668	Homo sapiens microRNA 4668 (MIR4668), microRNA. (from RefSeq NR_039814)
Z2168	0	-0.838	NR_029891	uc010rrt.2	MIR326	Homo sapiens microRNA 326 (MIR326), microRNA. (from RefSeq NR_029891)
Z2167	0	-0.838	NR_105007	uc032uyh.2	CTC-347C20.2	Homo sapiens uncharacterized LOC102477328 (LOC102477328), long non-coding RNA. (from RefSeq NR_105007)
Z4084	0	-0.838	NM_001098819	uc010ebk.4	PDE4C	Homo sapiens phosphodiesterase 4C, cAMP-specific (PDE4C), transcript variant 2, mRNA. (from RefSeq NM_001098819)
Z2519	0	-0.8353	NM_022126	uc001lhs.3	LHPP	Homo sapiens phospholysine phosphohistidine inorganic pyrophosphate phosphatase (LHPP), transcript variant 1, mRNA. (from RefSeq NM_022126)
Z2253	0	-0.8347	NM_001910	uc001hdu.3	CTSE	Homo sapiens cathepsin E (CTSE), transcript variant 1, mRNA. (from RefSeq NM_001910)
Z2254	0	-0.8347	NM_153486	uc002fdm.4	LDHD	Homo sapiens lactate dehydrogenase D (LDHD), transcript variant 1, mRNA. (from RefSeq NM_153486)
Z2859	0	-0.834	NM_001079	uc002syd.2	ZAP70	Homo sapiens zeta-chain (TCR) associated protein kinase 70kDa (ZAP70), transcript variant 1, mRNA. (from RefSeq NM_001079)
Z423	0	-0.8332	NM_014682	uc003xra.3	ST18	Homo sapiens suppression of tumorigenicity 18, zinc finger (ST18), mRNA. (from RefSeq NM_014682)
Z4612	0	-0.8285	NR_049850	uc031twd.1	MIR5585	Homo sapiens microRNA 5585 (MIR5585), microRNA. (from RefSeq NR_049850)
Z2891	0	-0.8267	NM_001282063	uc002dvo.4	DOC2A	Homo sapiens double C2-like domains, alpha (DOC2A), transcript variant 2, mRNA. (from RefSeq NM_001282063)
Z142	0	-0.8265	NR_029691	uc057lzy.1	MIR9-1	Homo sapiens microRNA 9-1 (MIR9-1), microRNA. (from RefSeq NR_029691)
Z2561	0	-0.8234	NM_016201	uc003eqg.3	AMOTL2	Homo sapiens angiomotin like 2 (AMOTL2), transcript variant 2, mRNA. (from RefSeq NM_016201)
Z1958	0	-0.823	NM_016541	uc002ckh.4	GNG13	Homo sapiens guanine nucleotide binding protein (G protein), gamma 13 (GNG13), mRNA. (from RefSeq NM_016541)
Z452	0	-0.8207	NM_145019	uc001vff.3	FAM124A	Homo sapiens family with sequence similarity 124A (FAM124A), transcript variant 1, mRNA. (from RefSeq NM_145019)
Z828	0	0.8212	NR_036096	uc021yoz.1	MIR3143	Homo sapiens microRNA 3143 (MIR3143), microRNA. (from RefSeq NR_036096)
Z1188	0	0.8219	NM_152317	uc001thi.4	DEPDC4	Homo sapiens DEP domain containing 4 (DEPDC4), mRNA. (from RefSeq NM_152317)
Z700	0	0.8225	NR_029476	uc004aui.4	MIRLET7A1	Homo sapiens microRNA let-7a-1 (MIRLET7A1), microRNA. (from RefSeq NR_029476)
Z1541	0	0.8243	NM_003419	uc002oex.4	ZNF345	Homo sapiens zinc finger protein 345 (ZNF345), transcript variant 1, mRNA. (from RefSeq NM_003419)
Z1629	0	0.8246	NM_001204403	uc001jkz.5	ANK3	Homo sapiens ankyrin 3, node of Ranvier (ankyrin G) (ANK3), transcript variant 3, mRNA. (from RefSeq NM_001204403)
Z2687	0	0.8254	NR_046383	uc003eiq.6	ALDH1L1-AS2	Homo sapiens ALDH1L1 antisense RNA 2 (ALDH1L1-AS2), long non-coding RNA. (from RefSeq NR_046383)
Z3657	0	0.8284	NR_022008	uc059guh.1	PWAR5	Homo sapiens Prader Willi/Angelman region RNA 5 (PWAR5), long non-coding RNA. (from RefSeq NR_022008)
Z3620	0	0.8286	NM_001172682	uc010sls.3	ZNF641	Homo sapiens zinc finger protein 641 (ZNF641), transcript variant 3, mRNA. (from RefSeq NM_001172682)
Z3469	0	0.8291	NM_001195831	uc021omk.2	CFAP57	Homo sapiens cilia and flagella associated protein 57 (CFAP57), transcript variant 5, mRNA. (from RefSeq NM_001195831)
Z4297	0	0.8334	NM_001008391	uc001mtv.5	CCDC73	Homo sapiens coiled-coil domain containing 73 (CCDC73), mRNA. (from RefSeq NM_001008391)
Z1903	0	0.8375	NM_001089584	uc003jea.7	C5orf49	Homo sapiens chromosome 5 open reading frame 49 (C5orf49), mRNA. (from RefSeq NM_001089584)
Z3223	0	0.8454	NM_018084	uc010yoz.2	CCDC88A	Homo sapiens coiled-coil domain containing 88A (CCDC88A), transcript variant 2, mRNA. (from RefSeq NM_018084)
Z3520	0	0.8495	NM_000928	uc001tyd.3	PLA2G1B	Homo sapiens phospholipase A2, group IB (pancreas) (PLA2G1B), mRNA. (from RefSeq NM_000928)
Z2901	0	0.8501	NM_181789	uc002aba.4	GLDN	Homo sapiens gliomedin (GLDN), mRNA. (from RefSeq NM_181789)
Z3997	0	0.8516	NM_001282748	uc004ald.5	TLE4	Homo sapiens transducin-like enhancer of split 4 (TLE4), transcript variant 1, mRNA. (from RefSeq NM_001282748)
Z1567	0	0.8531	NM_002242	uc002vtp.4	KCNJ13	Homo sapiens potassium channel, inwardly rectifying subfamily J, member 13 (KCNJ13), transcript variant 1, mRNA. (from RefSeq NM_002242)
Z3048	0	0.8534	NM_024587	uc001cmc.4	TMEM53	Homo sapiens transmembrane protein 53 (TMEM53), transcript variant 1, mRNA. (from RefSeq NM_024587)
Z3479	0	0.8539	NM_001082533	uc002itx.5	CA10	Homo sapiens carbonic anhydrase X (CA10), transcript variant 1, mRNA. (from RefSeq NM_001082533)
Z600	0	0.8565	NM_181897	uc003eqw.3	PPP2R3A	Homo sapiens protein phosphatase 2, regulatory subunit B'', alpha (PPP2R3A), transcript variant 2, mRNA. (from RefSeq NM_181897)
Z3837	0	0.8572	NM_001256099	uc031tbz.2	CTHRC1	Homo sapiens collagen triple helix repeat containing 1 (CTHRC1), transcript variant 2, mRNA. (from RefSeq NM_001256099)
Z4366	0	0.8576	NM_001003801	uc003wjs.4	SMARCD3	Homo sapiens SWI/SNF related, matrix associated, actin dependent regulator of chromatin, subfamily d, member 3 (SMARCD3), transcript variant 3, mRNA. (from RefSeq NM_001003801)
Z110	0	0.8582	NR_031649	uc021sdw.1	MIR1247	Homo sapiens microRNA 1247 (MIR1247), microRNA. (from RefSeq NR_031649)
Z4464	0	0.8618	NM_144627	uc001foo.4	TSACC	Homo sapiens TSSK6 activating co-chaperone (TSACC), transcript variant 2, mRNA. (from RefSeq NM_144627)
Z3737	0	0.8622	NM_003049	uc001xlr.3	SLC10A1	Homo sapiens solute carrier family 10 (sodium/bile acid cotransporter), member 1 (SLC10A1), mRNA. (from RefSeq NM_003049)
Z3816	0	0.8634	NR_038848	uc003jgy.3	LINC01021	Homo sapiens long intergenic non-protein coding RNA 1021 (LINC01021), long non-coding RNA. (from RefSeq NR_038848)
Z3733	0	0.8713	NM_001193513	uc002rof.3	SLC30A6	Homo sapiens solute carrier family 30 (zinc transporter), member 6 (SLC30A6), transcript variant 1, mRNA. (from RefSeq NM_001193513)
Z2437	0	0.8723	NM_152259	uc002boe.4	TICRR	Homo sapiens TOPBP1-interacting checkpoint and replication regulator (TICRR), transcript variant 2, mRNA. (from RefSeq NM_152259)
Z2157	0	0.8728	NR_121586	uc064rxm.1	RFX3-AS1	Homo sapiens RFX3 antisense RNA 1 (RFX3-AS1), long non-coding RNA. (from RefSeq NR_121586)
Z1219	0	0.8731	NM_152762	uc031xsf.2	TSGA10IP	Homo sapiens testis specific, 10 interacting protein (TSGA10IP), mRNA. (from RefSeq NM_152762)
Z4308	0	0.8802	NR_036197	uc021spk.1	MIR4312	Homo sapiens microRNA 4312 (MIR4312), microRNA. (from RefSeq NR_036197)
Z3617	0	0.8812	NR_037605	uc021pfa.1	GAS5-AS1	Homo sapiens GAS5 antisense RNA 1 (GAS5-AS1), long non-coding RNA. (from RefSeq NR_037605)
Z3588	0	0.889	NM_175744	uc001ecq.2	RHOC	Homo sapiens ras homolog family member C (RHOC), transcript variant 1, mRNA. (from RefSeq NM_175744)
Z1771	0	0.8996	NM_152343	uc002iis.1	SPATA32	Homo sapiens spermatogenesis associated 32 (SPATA32), mRNA. (from RefSeq NM_152343)
Z2160	0	0.9049	NM_001080532	uc059mlt.1	TMC3	Homo sapiens transmembrane channel-like 3 (TMC3), mRNA. (from RefSeq NM_001080532)
Z3795	0	0.9086	NM_024657	uc004emu.4	MORC4	Homo sapiens MORC family CW-type zinc finger 4 (MORC4), transcript variant 1, mRNA. (from RefSeq NM_024657)
