# Supplementary material for: Antagonistic Interactions in Mitochondria ROS Signaling Responses to Manganese
Source: Antioxidants (Basel). 2023 Mar 25;12(4):804. doi: 10.3390/antiox12040804 (PMC10134992; doi:10.3390/antiox12040804)
Supplement: Supplementary file 1 [file antioxidants-12-00804-s001.zip › Table S8.xlsx]

## Sheet: Sheet1
Supplemental Table S8: Annotation of metabolic features associated with Community 3 (mtOCR-mitochondrial oxygen consumption rate) at |r|>0.8 (P<0.05).
note: Value of r below correlation threshold <0.8 is denoted as 0
Annotations are from xMSannotator with 10 ppm tolerance using HMDB and KEGG database. Many of the common metabolites have been previously confirmed by coelution and MS/MS relative to authentic standards but are considered here as annotations because MS/MS of adduct forms have not been confirmed.
Features without annotations deemed useful by the authors are listed as "unknown".
ID	|r| bOCR	|r| pOCR	m/z	RT (sec)	Annotation	Formula	Adduct	Chemical_ID	Annotation Score
Y1988	0.8612	0.8819	570.666	117.6	Hydroxytetracosahexaenoyl-CoA	C45H70N7O18P3S	M+H+Na[2+]	CE4825	4
Y146	0	-0.8356	116.053	206.1	Pyrroline-carboxylate	C5H9NS	M(Cl37)+H[1+]	C03912	4
Y1070	0	0.8548	263.236	34.3	Retinyl palmitate	C36H60O2	M+2H[2+]	C03455	4
Y1797	-0.8312	0	469.329	86.7	13-Carboxy-gamma-tocopherol	C28H46O4	M+Na	HMDB12557	4
Y1731	0	0.899	441.298	85.1	13-Carboxy-gamma-tocotrienol	C28H40O4	M+H	HMDB12558	3
Y1446	-0.8914	-0.9202	354.285	417.6	Hydroxyhexadecanoic acid	C16H31O3	M+2ACN+H	HMDB06294	4
Y868	0.8368	0	223.154	527.2	Hexenoylcholine	C11H22NO2	M+Na	HMDB13162	4
Y2	0	0.8748	85.0285	176.8	Butynoate	C4H4O2	M+H[1+]	C06144	4
Y282	0	0.8321	135.117	52.9	Decenoic acid	C10H18O2	M+H-2H2O	HMDB31002	4
Y829	0	0.8369	215.165	554	Oxododecanoic acid	C12H22O3	M+H	HMDB10727	3
Y1305	0	-0.8339	317.194	175.5	Oxooctanoic acid	C8H14O3	2M+H	HMDB10721	4
Y798	0.844	0	210.936	166.9	Bromophenol epoxide	C6H5BrO2	M+Na[1+]	C14845	4
Y2737	0.9894	0.9497	989.29	109.1	Methylepicatechin glucuronide	C23H26O12	2M+H	HMDB29180	4
Y1796	-0.9076	-0.8901	469.066	242	Adenosine diphosphate	C10H15N5O10P2	M+ACN+H	HMDB00061	4
Y2038	-0.8815	0	601.43	187.7	Retinoic acid	C20H28O2	2M+H	HMDB01852	4
Y2188	0.8729	0.9584	685.281	293.1	Aquacobalamin	C62H90CoN13O15P	M+H+Na[2+]	C00992	4
Y2214	0.8679	0	702.46	122.7	Arginyl-arginine	C12H26N8O3	2M+ACN+H	HMDB28703	4
Y529	0.8286	0	169.08	549.9	Aspartyl-tryptophan	C15H17N3O5	M+H+NH4	HMDB28764	4
Y997	0	0.8935	247.114	282.1	Dimethylarginine	C8H18N4O2	M+2Na-H	HMDB01539	4
Y1960	0	-0.8703	557.817	307	CDP-DG (16:0, 22:3)	C50H87N3O15P2	M+2ACN+2H	HMDB06975	4
Y2905	0.8578	0.8809	1235.13	325.6	CE (14:0)	C41H72O2	2M+ACN+H	HMDB06725	4
Y1574	-0.9001	-0.8773	391.284	315.2	Cholic acid	C24H40O5	M+H-H2O	HMDB00619	4
Y2231	-0.8674	0	705.518	182	CL (16:0, 16:0, 18:0, 18:0)	C77H150O17P2	M+2H	HMDB56398	4
Y2548	0	-0.8931	848.556	179.9	CL (18:2, 22:5, 22:5, 22:5)	C94H150O17P2	M+2ACN+2H	HMDB58893	4
Y510	0.8599	0	167.022	199.2	Dihydrothymine	C5H8N2O2	M+K[1+]	C00906	4
Y708	0.8287	0	195.097	290.2	FAPy-adenine	C5H7N5O	M+ACN+H	HMDB04816	4
Y2617	0	-0.8201	888.313	121.7	Ferricytochrome c	C42H44FeN8O8S2R4	M(C13)+H[1+]	C00125	4
Y88	0	-0.8269	104.071	515.5	Aminobutyric acid	C4H9NO2	M+H	HMDB00112	3
Y686	0.8749	0.8905	192.052	50.6	Carboxyglutamic acid	C6H9NO6	M+H	HMDB41900	3
Y758	0.8406	0	204.098	273.5	Glutamyl-glycine	C7H13N3O4	M+H	HMDB29149	3
Y1431	0	-0.826	350.987	537.6	Glutamyl-Se-methylselenocysteine	C9H16N2O5Se	M+K[1+]	C05695	4
Y2485	0.8466	0	817.436	107.4	Ganglioside GD2 (18:0, 12:0)	C73H129N3O34	M+ACN+2H	HMDB11837	4
Y814	0	-0.9174	213.146	243	Geranylgeranylcysteine	C23H37NO3S	M+H+NH4	HMDB11678	4
Y1489	0.868	0.8345	364.809	127.6	Glucosylceramide (18:1, 18:0)	C42H81NO8	M+2H	HMDB04972	4
Y1022	0	0.8527	252.189	480	Glucosylsphingosine	C24H47NO7	M+ACN+2H	HMDB00596	4
Y1052	0	0.8696	259.108	296.9	Glutamylphenylalanine	C14H18N2O5	M+H-2H2O	HMDB00594	4
Y494	0.8212	0	163.067	206.4	Guanosine	C10H13N5O5	M+ACN+2H	HMDB00133	4
Y1432	0	0.8327	351.939	119.7	Iodotyrosine	C9H10INO3	M+2Na-H	HMDB00021	4
Y216	0.8583	0	126.091	531.1	Carnitine	C7H15NO3	M+H-2H2O	HMDB00062	4
Y1681	0.8451	0	424.342	76.7	Linoelaidyl carnitine	C25H45NO4	M+H	HMDB06461	3
Y111	0	0.8684	111.092	112.9	Lysine	C6H14N2O2	M+H-2H2O	HMDB00182	4
Y1526	-0.8837	-0.8719	372.175	46.6	Octanoylcarnitine	C15H29NO4	M+HCOOK[1+]	C02838	4
Y1102	0	0.8527	272.113	286.7	Phosphoarginine	C6H15N4O5P	M+NH4	HMDB29438	4
Y817	0.822	0	213.185	528.5	Methyl dodecenoate	C13H24O2	M+H	HMDB31028	3
Y1107	0.9056	0	273.011	255.2	Mevalonic acid-5P	C6H13O7P	M+2Na-H	HMDB01343	4
Y1000	0	-0.883	247.227	482.7	Acetylspermine	C12H28N4O	M(S34)+H[1+]	C02567	4
Y243	0.8873	0	131.09	260.7	Acetylaminobutanal	C6H11NO2	M(C13)+H[1+]	C05936	4
Y1176	0.8603	0.8779	287.068	295.9	Acetylcystathionine	C9H16N2O5S	M+Na	HMDB02381	4
Y2897	0.9067	0.8631	1225.14	108.5	Acetyl-ADP-ribose	C17H25N5O15P2	2M+Na	HMDB59656	4
Y183	0.9064	0	120.041	183.7	Orotic acid	C5H4N2O4	M+2ACN+2H	HMDB00226	4
Y2235	0	-0.8962	707.534	182.3	PC (14:1, 15:0)	C37H72NO8P	M+NH4	HMDB07901	4
Y1717	0.9523	0.8881	436.299	489.8	PC (18:2, 22:6)	C48H80NO8P	M+ACN+2H	HMDB08156	4
Y2467	0	-0.8839	810.54	181.6	PC (18:3, 22:6)	C48H78NO8P	M+H-H2O	HMDB08189	4
Y2377	0.8564	0.9173	772.524	181	PE (18:1, 22:6)	C45H76NO8P	M+H-H2O	HMDB09045	4
Y1524	0.8402	0	371.656	290.9	Pentacarboxyl porphyrinogen III	C37H40N4O10	M+ACN+2H	HMDB01957	4
Y2724	0	0.9105	979.518	89.8	PGP (18:3, 22:6)	C46H74O13P2	M+2ACN+H	HMDB13576	4
Y44	0	0.897	94.0652	184	Phenylamine	C6H7N	M+H[1+]	C00292	4
Y2376	0.9604	0.882	771.499	114	PS (14:0, 18:3)	C38H68NO10P	M+ACN+H	HMDB12337	4
Y2604	0	-0.9223	877.571	179.2	PS (18:0, 22:6)	C46H78NO10P	M+ACN+H	HMDB10167	4
Y2169	0	-0.8372	671.515	326.9	SM (18:0, 14:1)	C37H73N2O7P	M+H-H2O	HMDB13462	4
Y779	0.8828	0.866	207.159	450.9	Sphingosine phosphate	C19H42NO5P	M+H+NH4	HMDB60062	4
Y1165	0.9258	0.9931	285.279	544.8	Stearic acid	C18H36O2	M+H	HMDB00827	3
Y1285	0.8383	0	313.178	269.3	Tetradecanoic acid	C14H28O2	M+HCOOK[1+]	C06424	4
Y2625	0	0.8986	896.797	176.3	TG (15:0, 18:1, 18:0)	C54H104O5	M+ACN+Na	HMDB43249	4
Y1762	0	0.8216	452.916	138.9	TG (16:0, 16:0, 20:0)	C55H106O6	M+ACN+2H	HMDB05358	4
Y1804	0.8758	0.8833	474.969	178.4	TG (16:0, 24:1, 18:0)	C61H118O5	M+H+NH4	HMDB44248	4
Y2693	-0.8551	-0.8573	950.714	329.1	TG (20:4, 15:0, 20:5)	C58H94O6	M+ACN+Na	HMDB55542	4
Y519	-0.8542	-0.8222	168.092	167.3	Tryptophanamide	C11H13N3O	M+H-2H2O	HMDB13318	4
Y64	0.9682	0.8409	98.7157	150.4	Unknown	Unknown	Unknown	Unknown	Unknown
Y92	0	0.8378	105.104	176.9	Unknown	Unknown	Unknown	Unknown	Unknown
Y106	0.8448	0	109.712	137.8	Unknown	Unknown	Unknown	Unknown	Unknown
Y171	0	-0.8794	118.963	535.5	Unknown	Unknown	Unknown	Unknown	Unknown
Y293	0.8883	0	137.041	227.5	Unknown	Unknown	Unknown	Unknown	Unknown
Y311	0	0.8763	141.139	309.6	Unknown	Unknown	Unknown	Unknown	Unknown
Y478	0.8466	0	161.014	235.8	Unknown	Unknown	Unknown	Unknown	Unknown
Y485	0.8735	0	161.483	318.4	Unknown	Unknown	Unknown	Unknown	Unknown
Y521	0	-0.8431	168.535	245.9	Unknown	Unknown	Unknown	Unknown	Unknown
Y533	0	-0.8402	169.544	46.1	Unknown	Unknown	Unknown	Unknown	Unknown
Y605	-0.8696	-0.943	179.092	543.3	Unknown	Unknown	Unknown	Unknown	Unknown
Y612	0	0.8486	182.002	227.8	Unknown	Unknown	Unknown	Unknown	Unknown
Y657	0	-0.8893	188.525	241.6	Unknown	Unknown	Unknown	Unknown	Unknown
Y764	0	0.889	205.086	531.5	Unknown	Unknown	Unknown	Unknown	Unknown
Y770	0.8457	0.8902	205.928	224.2	Unknown	Unknown	Unknown	Unknown	Unknown
Y776	0.8232	0	207.059	296.7	Unknown	Unknown	Unknown	Unknown	Unknown
Y797	0	-0.8503	210.933	539.3	Unknown	Unknown	Unknown	Unknown	Unknown
Y832	0.9136	0.9601	215.957	283.4	Unknown	Unknown	Unknown	Unknown	Unknown
Y873	0.8645	0	223.989	240.1	Unknown	Unknown	Unknown	Unknown	Unknown
Y918	0.8607	0	232.993	283.3	Unknown	Unknown	Unknown	Unknown	Unknown
Y931	-0.8615	0	235.92	84	Unknown	Unknown	Unknown	Unknown	Unknown
Y938	0	0.8491	237.17	496	Unknown	Unknown	Unknown	Unknown	Unknown
Y1062	0	0.8859	261.784	292.3	Unknown	Unknown	Unknown	Unknown	Unknown
Y1063	0.8743	0	261.888	278.6	Unknown	Unknown	Unknown	Unknown	Unknown
Y1099	0	0.8485	271.511	280.4	Unknown	Unknown	Unknown	Unknown	Unknown
Y1119	-0.9039	-0.8449	274.874	138.3	Unknown	Unknown	Unknown	Unknown	Unknown
Y1167	0.8695	0	285.894	338.6	Unknown	Unknown	Unknown	Unknown	Unknown
Y1172	0.931	0.8659	286.907	163.3	Unknown	Unknown	Unknown	Unknown	Unknown
Y1184	0	-0.8761	289.469	362.8	Unknown	Unknown	Unknown	Unknown	Unknown
Y1188	-0.8778	-0.8694	290.036	197	Unknown	Unknown	Unknown	Unknown	Unknown
Y1254	-0.916	-0.911	306.892	551.6	Unknown	Unknown	Unknown	Unknown	Unknown
Y1257	-0.8249	-0.8608	307.144	308.4	Unknown	Unknown	Unknown	Unknown	Unknown
Y1310	0	0.8725	318.985	233.7	Unknown	Unknown	Unknown	Unknown	Unknown
Y1361	-0.8387	0	333	536.6	Unknown	Unknown	Unknown	Unknown	Unknown
Y1362	0	0.8434	333.994	240.6	Unknown	Unknown	Unknown	Unknown	Unknown
Y1369	0.8942	0	335.871	169.1	Unknown	Unknown	Unknown	Unknown	Unknown
Y1387	-0.8523	-0.9193	339.345	44.5	Unknown	Unknown	Unknown	Unknown	Unknown
Y1477	-0.8782	0	360.201	308.9	Unknown	Unknown	Unknown	Unknown	Unknown
Y1540	-0.8509	0	375.605	296.6	Unknown	Unknown	Unknown	Unknown	Unknown
Y1589	0	-0.8554	394.751	124.6	Unknown	Unknown	Unknown	Unknown	Unknown
Y1612	0.9738	0.8984	402.803	102.3	Unknown	Unknown	Unknown	Unknown	Unknown
Y1631	-0.8242	0	407.901	107.7	Unknown	Unknown	Unknown	Unknown	Unknown
Y1690	0	-0.8276	426.652	122.5	Unknown	Unknown	Unknown	Unknown	Unknown
Y1724	0.9199	0	437.884	175.2	Unknown	Unknown	Unknown	Unknown	Unknown
Y1743	-0.95	-0.889	446.899	87.8	Unknown	Unknown	Unknown	Unknown	Unknown
Y1751	0.832	0	449.756	172.2	Unknown	Unknown	Unknown	Unknown	Unknown
Y1794	0.9033	0.9194	468.726	122.4	Unknown	Unknown	Unknown	Unknown	Unknown
Y1819	0	0.9127	484.658	123.1	Unknown	Unknown	Unknown	Unknown	Unknown
Y1823	0.8255	0	486.787	123.7	Unknown	Unknown	Unknown	Unknown	Unknown
Y1858	0.9119	0.848	505.871	175.5	Unknown	Unknown	Unknown	Unknown	Unknown
Y1893	0.9303	0.9164	519.278	406.2	Unknown	Unknown	Unknown	Unknown	Unknown
Y1927	0.9615	0.8747	537.326	83.8	Unknown	Unknown	Unknown	Unknown	Unknown
Y1938	0	0.9022	543.676	292.7	Unknown	Unknown	Unknown	Unknown	Unknown
Y1964	-0.8252	0	560.303	328.6	Unknown	Unknown	Unknown	Unknown	Unknown
Y1973	-0.8321	-0.8355	564.674	116.4	Unknown	Unknown	Unknown	Unknown	Unknown
Y1975	0	-0.853	565.982	174.1	Unknown	Unknown	Unknown	Unknown	Unknown
Y1976	0	-0.8204	566.405	183.5	Unknown	Unknown	Unknown	Unknown	Unknown
Y1987	0	0.8469	570.62	117.5	Unknown	Unknown	Unknown	Unknown	Unknown
Y2007	0	0.8747	580.863	171.9	Unknown	Unknown	Unknown	Unknown	Unknown
Y2009	0.8855	0	581.365	176.4	Unknown	Unknown	Unknown	Unknown	Unknown
Y2013	0	-0.928	584.798	91.1	Unknown	Unknown	Unknown	Unknown	Unknown
Y2041	-0.8617	0	604.034	154.9	Unknown	Unknown	Unknown	Unknown	Unknown
Y2047	-0.8513	0	606.921	376.1	Unknown	Unknown	Unknown	Unknown	Unknown
Y2097	0	-0.845	634.966	173.5	Unknown	Unknown	Unknown	Unknown	Unknown
Y2108	0.8916	0.8307	642.804	93.2	Unknown	Unknown	Unknown	Unknown	Unknown
Y2112	0.9064	0	643.835	175.3	Unknown	Unknown	Unknown	Unknown	Unknown
Y2125	0.8519	0	651.979	175.1	Unknown	Unknown	Unknown	Unknown	Unknown
Y2128	0.903	0.8409	654.046	81.9	Unknown	Unknown	Unknown	Unknown	Unknown
Y2201	0.8728	0.9246	696.611	117.6	Unknown	Unknown	Unknown	Unknown	Unknown
Y2206	0.8376	0.893	698.765	94.3	Unknown	Unknown	Unknown	Unknown	Unknown
Y2248	0.8696	0	712.008	346.8	Unknown	Unknown	Unknown	Unknown	Unknown
Y2255	0	0.8969	713.785	330.8	Unknown	Unknown	Unknown	Unknown	Unknown
Y2296	0.9455	0.9374	736.857	172.5	Unknown	Unknown	Unknown	Unknown	Unknown
Y2298	0.9246	0.8894	737.859	177	Unknown	Unknown	Unknown	Unknown	Unknown
Y2310	0.9664	0.866	745.817	176	Unknown	Unknown	Unknown	Unknown	Unknown
Y2317	0	0.8557	750.829	176.7	Unknown	Unknown	Unknown	Unknown	Unknown
Y2384	0.9462	0.9282	775.281	343.5	Unknown	Unknown	Unknown	Unknown	Unknown
Y2514	-0.9585	-0.9085	828.924	335	Unknown	Unknown	Unknown	Unknown	Unknown
Y2569	0	-0.8653	856.874	346.4	Unknown	Unknown	Unknown	Unknown	Unknown
Y2582	-0.8426	0	862.21	301.8	Unknown	Unknown	Unknown	Unknown	Unknown
Y2613	0.8965	0.8406	886.325	120.1	Unknown	Unknown	Unknown	Unknown	Unknown
Y2645	0	0.8487	910.053	341.6	Unknown	Unknown	Unknown	Unknown	Unknown
Y2720	0.8537	0	977.284	117	Unknown	Unknown	Unknown	Unknown	Unknown
Y2727	0.9019	0	982.342	98.1	Unknown	Unknown	Unknown	Unknown	Unknown
Y2732	-0.8288	-0.8616	988.114	330.7	Unknown	Unknown	Unknown	Unknown	Unknown
Y2747	0	0.8598	995.301	111.8	Unknown	Unknown	Unknown	Unknown	Unknown
Y2748	0	0.8938	996.254	111.7	Unknown	Unknown	Unknown	Unknown	Unknown
Y2769	0.894	0.8471	1026.48	92.4	Unknown	Unknown	Unknown	Unknown	Unknown
Y2794	0.9164	0.8381	1045.26	108.9	Unknown	Unknown	Unknown	Unknown	Unknown
Y2801	0	0.8551	1053.26	108.8	Unknown	Unknown	Unknown	Unknown	Unknown
Y2830	0.9466	0.8893	1092.2	116.5	Unknown	Unknown	Unknown	Unknown	Unknown
Y2838	-0.8928	0	1106.86	85.5	Unknown	Unknown	Unknown	Unknown	Unknown
Y2851	0	-0.8568	1123.66	327.7	Unknown	Unknown	Unknown	Unknown	Unknown
Y2896	0.834	0	1223.12	108.8	Unknown	Unknown	Unknown	Unknown	Unknown
Y2912	0.8203	0.8828	1247.11	109.5	Unknown	Unknown	Unknown	Unknown	Unknown
Y2914	0.8381	0	1251.1	109.6	Unknown	Unknown	Unknown	Unknown	Unknown
Y2916	0	0.8872	1255.12	108.7	Unknown	Unknown	Unknown	Unknown	Unknown
Y2922	-0.8353	0	1270.08	116.5	Unknown	Unknown	Unknown	Unknown	Unknown
