# Supplementary material for: Antagonistic Interactions in Mitochondria ROS Signaling Responses to Manganese
Source: Antioxidants (Basel). 2023 Mar 25;12(4):804. doi: 10.3390/antiox12040804 (PMC10134992; doi:10.3390/antiox12040804)
Supplement: Supplementary file 1 [file antioxidants-12-00804-s001.zip › Table S9.xlsx]

## Sheet: Sheet1
Supplementary Table S9: Detailed information on significant metabolites from pathways associated with MCPs from figures 2,3,4,5
						MCP correlation, |r|>0.8, P< 0.05
Community	Metabolite	KEGG ID	m/z	RT (sec)	Adduct	Mn	thiols	mtROS	mtH2O2	SOD2	bOCR	pOCR
1.Mn	N-acetyl glutamate	C00624	190.071	48	M+H	-0.87	x	x	x	x	x	x
	Hexose bisphosphate	C01231	341.003	370.1	M+H	-0.97	0.87	-0.92	-0.91	-0.95	x	x
	Imidazole acetate	C02835	127.05	536	M+H	-0.88	0.85	-0.88	-0.94	-0.85	x	x
	Reduced riboflavin	C01007	401.141	288.3	M+Na	-0.87	x	x	x	x	x	x
2a.mtOx	Glycerophosphoinositol	C01225	335.074	204.1	M+H	x	-0.87	0.86	0.82	x	x	x
	Dopamine sulfate	C13690	256.025	245.7	M+Na	x	x	-0.82	-0.85	x	x	x
	Lipoamide	C00248	206.067	318	M+H	x	x	-0.86	-0.83	x	x	x
	Linolenic acid	C06427	279.232	44.1	M+H	x	0.97	-0.93	-0.92	-0.89	x	x
2b.Thiols	AMP	C00020	348.07	262.7	M+H	x	-0.86	x	x	x	x	x
	dIMP	C06196	165.019	52.5	M-2H	x	0.88	x	x	x	x	x
	Aminoadipate	C00956	162.076	45.4	M+H	x	0.88	-0.83	x	x	x	x
3.mtOCR	GABA	C00334	104.071	515.5	M+H	x	x	x	x	x	x	-0.83
	Asparagine	C00152	131.046	23.9	M-H	x	x	x	x	x	x	0.87
	Ketoglutaramic acid	C00940	144.03	99	M-H	x	x	x	x	x	0.88	x
	Stearic acid	C01530	285.279	544.8	M+H	x	x	x	x	x	0.93	0.99
